# Supplementary material
Source: PubMed Central journal article supplement (PMC8278674)
Supplement: 12977_2021_564_MOESM3_ESM.pdf [file 12977_2021_564_MOESM3_ESM.pdf]

>XtERV-S2 (Xt-S2) NC\_030680.2:c12439548-12431540 *Xenopus tropicalis* strain Nigerian chromosome 4, UCB\_Xtro\_10.0, whole genome shotgun sequence  
TGTAGTGCAGTAGGTTTCTTTTACTATGATTTGTATGATTTACAATTTATACATGCTTTAATATGTGTAT  
GTATATATATATATATATATATGTTTAGTTAGTAAAGTTTAAATCAAGCAATTTCTAGAGATAAGGGGAGTCCA  
GTGTCCTTGACATATATTTGTTGGGTAACAATACCTGCGTTTTATTTATGTAACAATAAACAAATGACTATAG  
ACTGTTTACCCAGCAAATACAACAAGCGGACGGCAGGCAGACAATGTCCAATGTATTTAAATAAGAACTT  
GAGGTATAAAAGTTTGGTATCTGATCAGACACAATGGCTGACCATTTGTTAAACAATATTTGTTCAAGTCAA  
TAGTTGGGCTTGGGGTTTTTTCCCTAAGAACTTTTGGCATAAAAAGAACGGCCTCTGCCTTGGGTCAGAAAGC  
TTCGCTTAGGACTCCTGAACGAGTGCCAGGATATTGGATCATCGCATGGTTATCGGGAACCTGAAGGTTT  
TGCACCAAAGGTTGAGGGGCTCCCGAGTTTGGCTGGATTAATGCTGAACTGGCTATCTTTGTAACCACAA  
AACCGTACGAAGCTAAATAAATGTTTTAAATTTCTATTACTATGTGTGTGTGTAAAGTTATTGCTCATTTAA  
TAGTTTTTCATCAGAAGGTTTAAATCATTGATCCTGTTAATAATAAATAATATTGATAAAGGTTAACCCCT  
TTATTACATTTGGCGTAGTCGGCAGGATTAACCCTTTTGGTGCTGTTAAATGCTGCAATAGCTTGTGCGAG  
GAATTTGAGAATTTATGTTTTAGTTTTGTTATGGTAGTGTAGAAGCAGTATTGTTAGTGGCTTGTGCGAGGCA  
TACATACTGTTTTAACAGATAGCAATAATGTTCTGCTGGTTAAAAACAAGGTTAGAGGGGTAGATGATCA  
AACGAGCACCTTCCCACGTGGGCTAGTTCCGGACCCTGGACCCACGTTGCTCGTGAGTTGGTTAAGTAT  
CAGCAACCTTTTCAAGTGACGAACCCCGGTCACCAGTTGCTGAATTTGGATTTGTCTCGGTATTCCAAAA  
AAGAGCAGAAAGCTGCAGCACAAAGTGGGTTGGTTGTGTTTTTCAGGCGCTCATGGAGGAGACAATCAAAAG  
GGAGTCAGTTGAGCTTGAAGTGCAGGCAGTTAAAGATCAACTGGTTGTGTTAAGAGAATGTTTTCGCTCC  
TCAGAAAAGTATCGTGAGGAGATGCAACAGAGTTTTCAAATATGTAGTAAAAACAGTAAATAAACAGC  
ACAGAAAAGAAAGGGAGGAAATCACCAGGAAATGGTGCAAAAAGTTAAAGTAAGGGCTCTTGTAAATAAAGG  
AGACTGGGGGAGTTAGCCCAATTTGTCAAGCGCAGACTCAGATGAAGAGATTGAGATAGGAGATGATATA  
GAAGAAGAAGAAATTAAGACCAATTTGTAACCTACCAACAAGGAGAGAAGTCACACAAAGAGCAGGCACTG  
ATAATAGAGATCAGGATTTATAGAGGAAGTGCAGAAGCAGCAGAACAGCAATATACAGAGGAAACTCGGTC  
ATATACTGCAGGAGAAATTAACAGAAATTTGGGTCAGAAAATTTGCCAGAAAAGGTGGTGAAGTATTCTAGAA  
TGGGTTTTGAGAGTGTGGGATTTGGGTTGGGATGGTATCATGCTCACTAGCAGGGAGGCAATAGGACTGG  
GGAGTATTGCAAAAAGACCCAAGGGTACGGCTTTATCTCAGGAGAGCCCGTGATACTACTGTGGCTTTTTTC  
CCTGTTACATTTGATCAGGGATTCAGTCTTACAAGTATATGATACCCCACTGAAATGATGGATTCTACC  
TCATGGCATACTATAGGGGAGGGGATACAGAGGTTAAGGGAGTATGGATGTGTGAGTGGTTTTGATTGCTG  
ATCCATTAGCTTCAGCACCCCAATAAACCTACTGTAAAAAGAGACATGGTCAGGACCAGACATGGCTCC  
CTTCACTGCACACATGAAAAATAAGCTGCTAGCAGGATCTCCACCCATTTGAAAAGCTCCATTGTTTCA  
ATGTTAAGTGCTTTAGATGCCAAGCAGGGTGTAAATACATGAAGCTGCAACATTTGCTGGGACATTTGGGAG  
AGTTAGAACGTATAGGGGAAAAAGTATCTAGACACCGTGTAAATTCAGAAAAGGGGTACAGAAAAGATTAAA  
AATTAGTCGGAGACAGTTGTTTTTTGATTTACTTCAAAGTGGAGTACCAAAGCCTGAAATTTGATGGTATG  
CCCACAGTTGATTTGTTGAAACTCTGGAAAACAATAAAAACACAAGGGGAGGCTGAAATCAACCCAAACAA  
AAAAGGTGGCAACCAGTGATATAGAGGATGTCCCTGTTACTCTTTCAGCTCCTCCTAATAAAGGGAAATTT  
TAACCCATACAGGGAAGTGGCTGAGGAATTTGGCAAGACATAAGGAGAGGAGTTGGGAGGTGCCAGTCTCT  
ATAGATTGACAGGATGGCAGATCCTCTGTGCCACTGGTAAAAATTAACACAATGAAACCAGGGGATCAAC  
GCCATATATATCAGTGGCAATATATTTGGCAGGGACAGTCAAAACCACAAACGGTTACTGCCTTCTAGA  
TACAGGGGCTGAAGTAACTTTGTTTCATGGAAATCAAAAACGACAGAGTGCAGGAATAGTAGCTATAGAG  
GGATTTGGGAGGTCAACATACACTGGCTCACAAAGTTCACTGCAGATTACAGATTTGAAAAGGGTCCCATTT  
TTAAAGCACGTGTGTTAATATCTGAGCTACCTGATAACATACTAGGAATGGATATTTTAAAGGGGCCAGAC  
TATCCATACTGATGCAGGCATGTATGTATTTGGTACCTCAGTTTCGTTCTTTTTCTGTTTCTGCAGTTAAA  
CCAATTTTAAAGGGGACATGCCAAGTGGACACCAGTGTACATCCCTCCGCCAAGCACCCCTGTCAATCTCA  
AGCAGTATCGCATACCCGGAGGCCACAAAGAAATTTACTGAAACAATTTCAAGCTTTGCTAGAGGTTGGAGT  
ATTTTCGGCCAGCAGTAAAGTCCATTTAATGCTCCAGTAAAGAAAAAGGATGGAAGCTGGAGAATGACTGTG  
GACTATCGTGGGTTAAACAAAGCAGCTCCACCTCTTGCAGCTGCTGTTCCAGATATAGTATCTATTGTGG  
AGGACATTTGCACAAACTGCTGGAGATTTGGCATGCAGTATTGGATTTAGCAAATGCTTTCTTTTCCATTCC  
TATTGCTGAGGAATCTCAAGATCAGTTTGCATTTCACTGGGAGGGAAAAACAATACACATTTAACTGTAGTA  
CCACAGGGTACATGCATTTCTCCACATTTATGTCATGGATTGGTGGCTAGGGATCTGGCCATGCTGCCTA  
ACATGGACTGTAAGTTTTATCACTACATTTGATGATGTTATGATCTCAGGCAGCTCAGAGGAACAAGTGAG  
AAAAGACTTACAAACAGTGGTGACATATATGCAGAAAAGAGGGTGGGCTATAAAACCCAGAAAAAATCCAA  
GGACCAGCAACTAGTGTGAGATTTCTTTGGAATGATCTGGGCTGGACCAGTCAAACTATCCCACAGCCTG  
TGTTGGATTCAAATGCTGCCCTTAAACCACCAAAAAATGTGAAAAGAGCTCAGAGTTTGTGGGTTCTGCT  
TGGATTTTGGAGGCTTTTTATTCCACACCTGGGCTCATTTCTCAGACCTATCTACAATATAACTAGGAAA  
AAGACTGAGTTTACCTGGGGTCTGAGCAGCAATTTGGCACTTGACACAGCCAAAGAACTGTAAGAACC  
ATCATTCACTAGGCTCTATACATCCAGATAAGCCATTTTTCTTAGATGTAGCAGTAACAGACCATGGAAT

GTCTTGGGGACTGTGGCAAAAAGGGCCTAATCCCAGGGATCGAAAAATACCTTTGGGTTTTTGGTCTAAG  
CAATTTTCAACTGCTCAGAAAAATACAGCCATTAGAGAAGCAATTGTTAGCTGCTTATACTGCCTTAC  
AACATGTTGAGCCAACACTACAAAGCAGCAATCTGTGACAGTAAGGACTGATTTACCTATTGCTGGATGGGT  
CAGACAAGAGGGCTACAATCCCGCACAGGTGTGGCCAGAAACAGACTTTGCAGAAATGGAAATGGTAT  
CTGAGTGAAGAGGGGGGAATATCTTCCCAAGACCCTAGTCAGCTATCGCAACAAATGCTGGTTTTGTTA  
ACTTTGAATCTAATGTAAATCAATTGCCCCACTGCATGCAGAGGAGTCACTATTCAAGGAAGCCCCACC  
ATGGATAGAGTTATCAGCAGAAAGATAAACTACGAGCATGGTTTACAGATGGCTCAGCTAAAAGTACTTAC  
AAGGGGCGGATATGGACTGCAGCAGCTTTTCAGCCTAGTTCAGAGACTATAATTCATCAGACGGGAGAAG  
GAGGTTCTAGTCAATATGCTGAACTACAAGCTGTTTATATGGTTGTCCAAGAGACCTCAGGCGACTTGAT  
TATCTATACAGATAGCTGGGCTGTATTTAAAGGTCTCACAACATGGCTTTGTATTTGGAAAAAGATAAC  
TGGCAAGTAAATGGAAAAGAGTTATGGGGCGGGCCTCAAGTATGGGATTTCTTATGGTGTCAAGGAAAA  
AGAGATGTATACAAGTAGGCCATGTTAATGCTCACACTGGAATCTGAACAATGAAATAGTAGATGGTCT  
GGACAAGTCTCTACTGCACAACAAGAGGAACTACCTTGGAAAGTGTGGGCAAAATGGGCCACAGTCAA  
ACTGGGCACAAAAGGAGTTCAAGGTACCTGGCAGTGGGCACAGCAGAGGGGAATACCTCTAACACAAATCC  
AAGTGAAGGACATAATGCTAAATGTCTGTATGTGTCAGGAAGCCAAGAAAGTGGCCACCTTTGACCCCAT  
GCCTGGAAAAATTCATCGAGGACAAAAGCCAGGACAAGTCTGGCAAGTGGATTATATTGGACCTTGCCCT  
GGAGGAAGGGTGGTTTTAAAAATATTGTGCGACTGCTGTGGACACATACAGTGGACTAGTACAAGTATTT  
CAACAAAAAGTGCAGATCAAAAAACAACCTAAGATTGATGCAACTGCTAATACAACATTATGGAATGCC  
TCAAGAAGTACAGTCAGATAATGGCACACATTTTACTGGACAGACCGTAAAGCAATGGGCGGAGGATAAT  
GGTGTATACTGGGTGTTCCACATTCCTGATTTATCTCAAGGGGCAGCGTTGATTGAGAGAATGAATGGTC  
TCTTAAAGGAACAAATGCGCAAACCTTACACCTACTCACACACTACGGGGATGGGATAAGGTGTTACAAGA  
GGCAGTATATTTATTAATAATAGATCAGTTGGACATTTCACTCCTATTCAAAGAAATGCTGGGAGAAAGT  
GGGAGAAATAGTTTCAAGTTGGGTAGTAACAGTTACTACAAAAGTTCAACAGTCCCTTTATCTCAGTCTA  
TTCTGTATTTATACACAAAAGATTTAGTTGTAGGAGGTGAAGAAGAACATACTATGTTACAAATTCATC  
CATATCAGTACCAACAGGAATTTTAGACATAGATCCAACATGTGACTTGAATTCATCCCAGATTTTGAT  
TTAACCCTCAGTGTGACTGGGATGTTGACGTTAGAAAAAGATGAATTTGGGGGAATATTTGTGTCACTATT  
TTCTTTTGGTTCGGGCACAGTTTAAAGAAAGGACAAAAAATAGGACAAAATAGTGAATTTTACAAAACGTTT  
GCAAGTGAAGGGAAATATTTATTCACACAGTTAGGAACAAAAGGTATGGATAGCTCCAAGTGTAAACAGAC  
AGGGGTAGAAAAACAGGTAGAAAAGGAGAAATTTGTGGCCTGGGGTCCCTGGGTCAACAGCATTAGTTTTAA  
TAGATGCTGAAGATCAGCCTGTTTTATGTTCCCTCTTACAGATTATTACCACCTACCATGAGGAGTTTGCCT  
TGCTACTGATGCTCGCGATATGCTGATGAAAGTGACTGCGGAAAGGAATTTTTATCATGAAACGCTGA  
AAGCTACTGCTGCAGTATTTAATGTAACAACTGTTGGATATGTGGCAAAATCCACATGCGACTGAAGA  
AGGAATTCCACTTTATGGACTGCCATTTAATATGAGTTGGATAAAACAGAACCAGCCCTGAGTGGAACTTT  
TTTTTCAATATGACTACAAAACAATGTGCTATTTGCTAGATATGCAGGTACAGAAAAAGAGCAACAGTTGA  
AGTTAACCCGGAAATCAACAGGGATTTTGTGTGTCCAGAAAAATCAAACCACTGAGACTGTGTGGTTAGG  
AAAAAGTCAATGTGACTATGTTGTCAACACAGTTAACAACACACATGTAATGGTGACAGGAAAAGGGGAA  
ATGTTTTATATGTTTTATGTTAAGCAATGTTTCAATTTGATTTTAGAGTTACTACAAATGATACGCATATTT  
GCGAAAGATCAAGTACAAGCTCTCTGGTATGCTGTAATACTTACCATCTAATAGTACCAGGGTAGGAAT  
ATACTGGCAATATCAGTTATATCTAGCAACTTGTTCCTCATTGCCAATCAGTTGTACTTTATTTGTGGG  
AATAATGTTTTATAAGTGGCTACCATATAATTTGGGAGGAAATGTTATATAGGAAATATAGACCAAAAT  
TTAGAGTATTTATTTGAGAACCACAAAAGGGCATGTGAGAAATTTGAAACGGCATTTTGCCTCTTCTCATGT  
TAATGAATTACCCGAAGAGTGGGATACTTCAGAAGAAAAACAGATTTGTTATGATTTTAAATACCCCATAT  
GGAGTAGCAAAAAGCTGTGCAAAATGATGAGAAGAAATGCTAGAAATAATGAAACATGCTTTAAACAACACAT  
TAGATGGCTTGACTAGTCTTACCAGGAAAGTCAGACAAATGAGGTTAGTGGTTCTGCAAAATAGAGCATC  
GCTAGATTATATCTTAGCTTCAAAGGGAGGTGATGTGCTCTGATTGGAGATGAATGTTGCACATATATC  
TCAGATAAAAAGTCTGGAAGTAGAGGATGACATCTCTGAAGCTCGAAAGTCAGTAGCCAAATTCATGCCC  
AAAATACTGGTAGTTGGTTATTTAGTTGGTTGGGGCAATGGGGACAACAATGTTTATGTATATAACATC  
ATTTATTTATATTCATTTAGGAATTTTTCTTGTGATAAAAAATAATCAGTGTCTGTATCAGTAAGTATACT  
ACATCTGCAATAGAAATCATTACCTATACGCAAAAAGTGAATAATATATTAATAATTTCTCAATCAGTAT  
TTTTGTAATCAAAGGGTGGAAATGTAGTGCAAGTAGGTTTCTTTTACTATGATTTGTATGATTTACAATTTA  
TACATGCTTTAATATGTGTATGTATATATATATATATATATATATATATATATATATATATATATATAT  
TCTAGAGATAAGGGGAGTCCAGTGTCTTGTACATATATTTGTTGGGTAACAATACCTGCGTTTTATTTATGT  
AACAAATAAACAATGACTATAGACTGTTTACCCAGCAAAATACAACAAGCGGACGGCAGGCAGACAATGTCC  
AATGTATTTTAAATAAGAACTTGAGGTATAAAAGTTTGGTATCTGATCAGACACAATGGCTGACCATTTGTT  
AAACAATATTTCAAGTCAATAGTTGGCTTGGGGTTTTTCTTAAAGAACTTTTGGCATAAAAAGAACGG  
CCTCTGCCTTGGGTGAGAAGCTTCGCTTAGGACTCTGAACGAGTGCCAGGATATTGGATCATCGCATGG  
TTATCGGGAACCTGAAGTTTTTGCACCAAAGTTGAGGGCTCCCCGAGTTTGTGGATTAATGCTGAAC

TGGCTATCTTTGTAACCACAAAACCGTACGAAGCTAAGTAAATGTTTTAAATCTATTACTATGTGTGTG  
TGTAAGTTATTGCTCATTTAATAGTTTTTCATCAGAAGTTTTAATCATTGATCCTGTTAATATAAATAAT  
ATTGATAAAGGTTAACCCCTTTATTACA

>XtERV-S3(Xt-S3)NC\_030680.2:c11872885-11864925 *Xenopus tropicalis* strain

Nigerian chromosome 4, UCB\_Xtro\_10.0, whole genome shotgun sequence  
TGTAGTGCAGTAGGTTTCTTTTACTATGATTTGTATGATTTACAATTTATACATGCTTTAAAATATGTGTA  
TGATATATATATATATATATATGGTTTAGTTAGTAAAGTTAATCAAGCAATTTCTAGAGATAAGGGGAGTCC  
AGTGTCCTTGACATATATTTGTTGGGTAACAATACCTGCGTTTATTATGTAACAATAAACAATGACTATA  
GACTGTTTACCCAGCAAAACAACAAGCGGACGGCAGGCAGACAATGTCCAATGTATTTAAAATAAGA  
TGAGGTATAAAGTTTGGTATCTGATCAGACACAATGGCTGACCATTTGTTAAACAATATTTGTTCAAGTCA  
ATAGTTGGGCTTGGGGTTTTTCCTAAGAACTTTTGGCATAAAAAGAACGGCTCTGCCTTGGGTGAGAAG  
CTTCGCCTAGGACTCCTGAACGAGTGCCAGTATTGGATCATCGCATGGTTATCGGGAACCTGAAGGTTT  
TGCACCAAAGGTGAGGGGCTCCCGAGTTTGGCTGGATTAATGCTGAACTGGCTATCTTTGTAACCACAAA  
ACCGTACGAAGCTAAAATAATGTTTTAAATTTCTATTACTATGTGTGTGTGTAAGTTATTGCTCATTTAAT  
AGTTTTTTTCATCAGAAGGTTTAATCATTGATCCTGTTTAATATAAATAAATATTGATAAAGGTTAACCCCT  
TTTATTACATTTGGCGTAGTCGGCAGGATTAACCCCTTTTGGTGTGTTAAATGCTGCAATAGCTTTGTGCA  
GGAATTTGTAGAATTTATGTTTAGTTTGTATGGTAGTGTAGAAGCAGTATTGTAGTGGCTTTGTGCAGGGCA  
TACATACTGTTTAAACAGATAGCAATAATGTTCTGCTGGTTAAAAACAAGGTTAGAGGGGGTAGATGATC  
AAACGAGCACCTTCCCACGTGGGCTAGTTCCGGACCTGGACCCACGTTGCTCGTGAGTTGGTTAAGTA  
TCAGCAACCTTTTCAAGTGACGAACCCCGTACCAGTTGCTGAATTTGGATTTGTCTCGGTTTCCAAAA  
AAGAGCAGAAAGCTGCAGCACAAGTGGGTTGGTTGTGTTTTTCAGGCGCTCATGGAGGAGACAATCAAAAG  
GGAGTCAGTTGAGCTTGAACGAGGACGTTAAAGATCAACTGGTTGTGTTAAGAGAATGTTTTCGCTCC  
TCAGAAAAGTATCGTGAGGAGATGCAACAGAGTTTTCAAATTTATGTAGTAAAAACAGTAAATAAACAGC  
ACAGAAAAGAAAGGGAGGAAATCACCAGGAAATGGTGCAAAAAGTTAAAGTAAGGGCTCTTTGTAATAAAGG  
AGACTGGGGGAGTTAGCCCAATTTGTCAGCGCAGACTCAGATGAAGAGATTGAGATAGGAGATGATATAG  
AAGAAGAAGAAATTAAGACCAATTTGTAACACAAAACAAGGAGAGAAAGTCACACAAAAGAGCAGGCACTGA  
TAATAGAGATCAGGATTTATAGAGGAAGTGCAGAAGCAGCAGAACAGCAATATACAGAGGAAACTCGGTCA  
TATACTGCAGGAGAATTAACAGAATTTGGGTGAGAAATTTGCCAGAAAGGTGGTGAAACTATTTCTAGAAT  
GGGTTTTGAGAGTGTGGGATTTGGGTGGGGATGGTATCATGCTCACTAGCAGGGAGGCAATAGGACTGGG  
GAGTATGCAAAAAGACCCGAGGGTACGGCTTTATCTCAGGAGAGCCCGTGATACTACTGTGGCTTTTTTTTC  
CCTGTTACATTTGATCAGGGATTCAGTCCCTACAAGTATATGATAACCCCACTGAAATGATGGATTCTACC  
TCATGGCATACTATAGGGAGGGGATACAGAGGTTAAGGGAGTATGGATGTGTGTGGTTTTGATTGCTGATC  
CATTAGCTTCAGCACCCCCAAAATAAACCTACTGTA AAAAGAGACATGGTCAGGACCAGACATGGCTCCCTT  
CACTGCACACATGAAAAATAAGCTGCTAGCAGGATCTCCACCCATTTGAAAAGCTCCATTGTTTCACAATG  
TTAAGTGTCTTAGATGCCAAGCAGGGTGTAAATACATGAAGCTGCAACATTTGCTGGGACAGTTGGGAGAGT  
TAGAACGTATAGGGGAAAAAGTATCTAGACACCGTGTAAATTCAGAAAAGGGGTACAGAAAAGATTAATAAT  
TAGTCGGAGACAGTTGTTTTTTGATTTACTTCAAAGTGGAGTACCAAAGCCTGAAATTTGATGGTATGCC  
ACAGTTGATTTGTTGAACTCTGGAACAATAAAACAAGGGGAGGCTGAAATCAACCAACCAAAAA  
AGGTGGCAACCAGTATATAGAGGATGTCCCTGTTACTCCTTCAGTCCCTCCTAATAAAGGGAAATTTAA  
CCCATACAGGGAAAGTGGCTGAGGAATTTGCCAAGACATAAGGAGAGGAGTTGGGAGGTGCCAGTCTATA  
GATTGACAGGATGGCAGATCCTCTGTGCCACTGGTAAAAATTAACACAATGAAACCAGGGGATCAACGCC  
CATATATATCAGTGGCAATATATTGGCAGGGACAGTCAAAAACCACAAAACGGTTACTGCACTTCTAGATAC  
AGGGGCTGAAGTAACTTTGTTTTCATGGAAATCAAAAACGACAGAGTGCAGGAATAGTAGCTATAGAGGGA  
TTGGGAGGTCAACATACACTGGCTCACAAGGTTCACTGCAGATTACAGATTGGAAAAGGGTCCCATTTTTTA  
AAGCACGTGTGTTAATATCTGAGCTACCTGATAACATACTAGGAATGGATATTTTAAGGGGCCAGACTAT  
CCATACTGATGCAGGCATGTATGTATTTGGTACCTCAGTTCTGTTCTTTTTCTGTTTCTGCAGTTAAACCA  
ATTTTAAGGGGACATGCCAAGTGGACACCAGTGTACATCCCTCCGCCAAGCACCTGTCAATCTCAAGC  
AGTATCGCATACCCGGAGGCCACAAAGAAATTAAGTAAACAATTCAGGCTTTGCTAGAGGTTGGAGTAT  
TCGGCCAGCAGTAAGTCCATTTAATGCTCCAGTAAAGAAAAAGGATGGAAGCTGGAGAATGACTGTGGAC  
TATCGTGGGTTAAACAAGCAGCTCCACCTCTTGACAGTGTGTTCCAGATATAGTATCTATTGTGGAGG  
ACATTGCACAAAAGTGTGGAGATTGGCATGCAGTATTGGATTTAGCAAATGCTTTCTTTTCCATTCCCTAT  
TGCTGAGGAATCTCAAGATCAGTTTGCATTCACCTGGGAGGGAAAAACAATACACATTAAGTGTAGTACCA  
CAGGGGTACATGCATTTCTCCACATTTATGTCATGGATTGGTGGCTAGGGATCTGGCCATGCTGCCTAACA  
TGGACTGTAAGTTTTTACTACTACATTTGATGATGTTATGATCTCAGGCAGCTCAGAGGAACAAGTGGAGAA  
AGACTTACAAACAGTGGTGACATATATGCAGAAAAGAGGGGTGGGCTATAAACCAGAAAAAATCCAAGG  
ACCAGCAACTAGTGTGATTTCTTGAATGATCTGGGCTGGACCAGTCAATCTATCCACAGCTGTG

TTGGATTCAATTGCTGCCCTTAAACCACCAAAAAATGTGAAAGAAGCTCAGAGTTTGTGGGTCTGCTTG  
GATTTTGGAGGCCTTTTATTTCCACACCTGGGCCTCATTCTCAGACCTATCTACAATATAACTAGGAAAA  
GACTGAGTTTACCTGGGGTCTGAGCAGCAATTGGCAGTTGACACAGCCAAAGAACTGTAAGAACCCAT  
CATTCAGTAGGTCCTATACATCCAGATAAGCCATTTTCTTAGATGTAGCAGTAACAGACCATGGAATGT  
CTTGGGGACTGTGGCAAAAAAGGCCTAATCCCAGGGATCGAAAAATACCTTTGGGTTTTTGGTCTAAGCA  
ATTTTCAACTGCTCAGAAAAATACAGCCCATTAGAGAAAGCAATTGTTAGCTGCTTATACTGCCTTACAA  
CATGTTGAGCCAACTACAAAAGCAGCAATCTGTGACAGTAAGGACTGATTTACCTATTGCTGGATGGGTCA  
GACAAGAAAGGGCTACAATCCCGCACAGGTGTGGCCCAGAAAACAGACTTTGCAGAAAATGGAAAATGGTATCT  
GAGTGAAGAGGGGGGAATATCTTCCCAAGACCCTAGTCAGCTATCGCAACAAAATGCTGGTTTTGTTAAC  
TTTTGAATCTAATGTAAATCAATTGCCCCACTGCATGCAGAGGAGTCACTATTCAAGGAAGCCCCACCAT  
GGATAGAGTTATCAGCAGAAGATAAACTACGAGCATGGTTTACAGATGGCTCAGCTAAAGTGACTTACAA  
GGGGCGGATATGGACTGCAGCAGCTTTTCAGCCTAGTTTCAGAGACTATAAATTCATCAGACGGGAGAAGGA  
GGTTCTAGTCAATATGCTGAACCTACAAGCTGTTTATATGGTTGTTCCAAAGAGACCTCAGGGGACTTGATTA  
TCTATACAGATAGCTGGGCAAAAAGTGGCTAAAATGGAAAAGAGTTATGGGGCGGGCCTCAAGTATGGGATT  
TCTTATGGTGTCAAGGAAAAAAGAGATGTATACAAGTAGGCCATGTTAATGCTCACACTGGAAAATCTGAA  
CAATGAAAATAGTAGATGGTCTGGCACAAGTCTCTACTGCACAACAAGAGGAAAACCTTTGGAAAGTGTG  
GGCAAAATGGGCCACAGTCAAACTGGGCACAAAAGGAGTTCAAGGTACCTGGCAGTGGGCACAGCAGAGGG  
GAATACCTCTAACACAAAATCCAAGTGAAGGACATAAATGCTAAAATGTCCTGTATGTCAGGAAGCCAAGAA  
GTGGCCACCTTTGACCCATTTGCCCTGGAAAAATTCATCGAGGACAAAAGCCAGGACAAGTCTGGCAAGTG  
GATTATATTGGACCTTTGCCCTGGAGGAAGGGTGGTTTTAAAAATTTGTGCGACTGCTGTGGACACATACA  
GTGGACTAGTACAAGTATTTCCAAAAAAGTGCAGATCAAAAAACAACCTTAAGATTGATGCAACTGCT  
AATACACATTATGGAAATGCCCAAGAGTACAGTCAGATAATGGCACACATTTTACTGGACAGACCGTA  
AAGCAATGGGCGGAGGATAATGGTGTATACTGGGTGTTCCACATTTCCGTAATATCCTCAAGGGGCAGCGT  
TGATTGAGAGAAATGAATGGTCTCTTAAAGGAACAAAATGCGCAAACTTACACCTACTCACACACTACGGGG  
ATGGGATAAGGTGTTACAAGAGGCAGTATATTTATTAATAATAGATCAGTTGGACATTTCACTCCTATT  
CAAAGAAATGCTGGGAGAAAAGTGGGGAGAAATAGTTTCAGATTTGGGTAGTAACAGTTACTACAAAAAGTTCAA  
CAGTCCCTTTATCTCAGTCTATTTCTGTATTTATACACAAAAGATTTAGTTGTAGGAGGTGAAGAAGAACA  
TACTATGTTACAAAATACATCCATATCAGTACCAACAGGAATTTTGTAGACATAGATCCAACATGTGACTT  
GCAATTCATCCCAGATTTTGTATTTAACCACTCAGTGTGACTGGGATGTTGACGTTAGAAAAGATGAATG  
GGGAAATATTGTGTCACTATTGTTCTTTTGGTTCGGGCACAGTTTAAAGAAAGGACAAAAATAGGACAAAT  
AGTGATTTTACCAAAACGTTTTTGCAGTGAAGGGAAATATTTATTTCCACACAGTTAGGAACAAAAGGTATG  
GATAGCTCCAAGTGTAACAGACAGGGGTAGAAAAACAGGTAGAAAAGGAGAAAATTTGTGGCCTGGGGTCT  
GGGTCAACAGCATTAGTTTTAATAGATGCTGAAGATAAGCCTGTTTATGTTTCTTCCACAGATTATTAC  
CACTACCATGAGGAGTTTGCCTTGTCTACTGATGCTCGCGATATGTCTGATGAAAAGTACTGCGGAAAAG  
AATTTTTATCATGAAACGCTGAAAGCTACTGCTGCAGTATTTAATGTAACAAAATGTTGGATATGTGGCA  
AAATCCACATGCGACTGAAGAAGGAATTCACCTTTATGGACTGCCATTTAATATGAGTTGGATAAACAG  
AACCGACCTGAGTGGAACTTTTTTTTTCAATATGACTACAAAACAATGTGCTATTGCTAGATATGCAGGT  
ACAGAAAAAGAGCAACAGTTGAAGTTAACCGGAAATCAACAGGATTTTGTGTGTCCAGAAAAATCAA  
CCACTGAGACTGTGTGGTTAGGAAAAAGTCAATGTGACTATGTTGTCAACACAGTTAACACACACATGT  
AATGGTGCAGGAAAAGGGGAAATGTTTTATATGTTTTTATGTTAAGCAATGTTCAATTTGATTTTAGAGT  
TACTACAAATGATACGCATATTTGCGAAAGATCAAGTACAAGCTCTCTGGTATGCTGTAAAATCTTACCA  
TCTAATAGTACCAGGGTAGGAATATACTGGCAATATCAGTTTATATCTAGCAACTTGTTCCTTCCCATTTGCCCA  
ATCAGTTGTACTTTATTTGTGGGAATAATGTTTATAAGTGGCTACCATATAAATGGGCAGGAAAATGTTA  
TATAGGAAATATAGCACCAAAATTTAGAGTATTTATTTGAGAACCCAAAAGGGCATGTGAGAAAATGGAAA  
CGGCATTTTGCCTCTTCTCATGTTAATGAATTACCCGAAGAGTGGGATACTTTCAGAAGAAAACAGATTTG  
TTATGATTTTAAATACCCCATTTATGGAGTAGCAAAAAGCTGTGCAAAATGATGAGAAGAATGTCTAGAATAAT  
TGAACATGCTTTAAACAACACATTTAGATGGCTTGACTGACTTTACCGAGGAAGTCAGACAAAATGAGGTTA  
GTGGTTCTGCAAAATAGAGCATCGCTAGATTATATCTTAGCTTCAAAGGGAGGTGTATGTGCTCTGATTG  
GAGATGAATGTTGCACATATATCTCAGATAAAAGTCTGGAAGTAGAGGATGACATCTCTGAAGCTCGAAA  
GTCAGTAGCCAAATTCATGCCCCAAAATACTGGTAGTTGGTTATTTAGTTGGTTGGGGCAATGGGGACAA  
CAATTTGTTATGTATATAACATCATTTTATTATATTCATTTCTAGGAATTTTTCTTGTGATAAAAAATAATCA  
GTGTCTGTATCAGTAAGTATACTACATCTGCAATAGAATCATTACCTATACGCAAAAATGGAAATAATATA  
TTAAATATTTCTCAATCAGTATTTTTGTAAATCAAAGGGTGGAAATGTAAGTGCAGTAGGTTTCTTTTACTA  
TGATTTGTATGATTTACAATTTTATACATGCTTTAATATGTGTATGTATATATATATATATATATGTTTTAG  
TTAGTAAGTTTAAATCAAGCAATTTCTAGAGATAAGGGGAGTCCAGTGTCTTGTACATATATTTGTTGGGTA  
ACAATACCTGCGTTTTATTATGTAAACAATAAACAATGACTATAGACTGTTTACCCAGCAAAATACAACAAGC  
GGACGGCAGGCAGACAATGTCCAATGTATTTAAATAAGAACTTGAGGTATAAAGTTTGGTATCTGATCAG

ACACAATGGCTGACCATTTGTTAAACAATATTGTTCAAGTCAATAGTTGGGCTTGGGGTTTTTCCTAAG  
AACTTTTGGCATAAAAAGAACGGCCTCTGCCTTGGGTCAGAAGCTTCGCCTAGGACTCCTGAACGAGTGCC  
AGGATATTGGATCATCGCATGGTTATCGGGAACCTGAAGGTTTTGCACCAAAGGTTGAGGGCTCCCCGA  
GTTTGCCTGGATTAATGCTGAACTGGCTATCTTTGTAACCACAAAACCGTACGAAGCTAAGTAAATGTTTT  
AAATCTTACTATGTGTGTGTGTAAGTTATTGCTCATTTAATAGTTTTTTCATCAGAAGGTTTAAATCAT  
TGATCCTGTTAATAATAAATAATATTGATAAAGGTTAACCCCTTTATTACA

>Xt-S4\_CM004449.2:75962155-75966160\_ *Xenopus tropicalis* strain Nigerian  
chromosome 7, whole genome shotgun sequence

TGTAGCACGGTAGATTTTCTATTGATTTTATGATTTACAATATATACATCTGCTTTGACATATGAATCAAATC  
TTAGGTTTGGAGTCAAGTAAAAGCAGCAGATTTTGGGACAGCTATTGTCTAGTGTTCGAAGGTACAATGTTTTTG  
TTCTATGTATATTGCTGGGTAAACAGTAAACACAGGTATTGTTACCCAGCAAATATCCTTGGAATAAACAAAC  
AGACAGCATATAGACAATACACTTTATGTACAACATATTTGAGCAACAAATAAGGCCTTCTAAGTCTAGTTAA  
TAGGTTTTGTTTCATGACAAAAGTTTGTACACAAGTCAGCACTTGGTGTGGGGGTTTTGCTAAGAACTCTACTA  
TAAAAGGAGCCTCCACCATGTGTCGGGAGCTTCGCCTAGGACTCCTGAATGAGTGCCGGGACATTTGGATCA  
TCGCTTGGTTATCGGGAACCTGAAGGTCTTGCGCCAAAGGTTGTGGGGCTCCCCGATTGTGCTGAATTGTGCA  
GAACTGGCTATACTTGTAACTAATCATACTAAGATAAGTAAATCTATTTAATTCTATTATTACTTGTGTGTGT  
GTAAGTTATTGCTCACTAACAGTCTATCAGAAGGTTAATCATTGATCCTGCATATTTATTAATATTTGTCAT  
TAATGTCAATTAATAACAAATTTAATAATTAATAAAGGTTACCCCTTTTATTACATTTGGTGTAGTCGGCAG  
GATTAACCCTTTTGTATGCTGGGAAGTGCAGTAATAACTTGTATAGAAATTGTAGAATTTATAGTGCAGCTTTG  
TATGGTAGTGTAGTGGCAGTATTGTAGTGGCTTGTGCAGGGCAAACATACTGTTGAAAGTTAGCAATAATGTT  
CTGTTGGTTGAAAAACAAAGTTAGAGGGGTAGATGATCAAACGAGCAACCTTCCCACATGGGCTAGTTCGGGA  
CCCTGGACCCATGTTGCTCGGGATGTGATAGGAGATCAGCAACTCTCTCAGGTGACTCAACCCCATCACCTGT  
TGCTGAATTTGGATTTGTCTATGTGTTCCAAGGAGCTGAAGTCCCTCAGCACAAATTGGGTTGGTGTGTTTTCA  
GGCGCTCAGGGAGGAGACAGTCCAAAGGGAGGCAGTTGAGCTTGAGCTGCAGGCAGTTAAAGATCAACTAGCC  
ACAATGAGAGAATGTTTGTCTCCTCATTAGCACACAATGAGGAGTTGGAGATAGAATTTACAAAATATGTGG  
TAAGAACTATGAGTAAAAGCACCATAGAAAAGGGACAGAACAAGCAGAAAATGGTGTAAAGAGTAAGAACTCT  
TGTAAGTAAAAGAGACTAAGGGTGTGATTTATTTCTCAAGATAGAGAAAACAAAATAAATGTTACATTGTGTTA  
AATTGTACTGTATGTTAATGTCATATGTTTTTCTGTTTCAGGATTTAAGAATCTGATTATTTTGGAGTTAATAT  
GGTTTTTGATAACAGGCATCAAGAGTTGATGGATCCATTATTTTTGACACTTTTTGTTTTGTTTTTAAAGTGC  
ACAAATTTGTGCGTAAAGGCCTTAAGACATGTCTGTTTTGTTAAAAAAAAGTTTAACAATGAAACTTGAA  
AGTTTTTAAACACTTTTTGTTGTATGTTTTCTGAGAATGTGTGGGCCACATGCATGTTGTTATGGTTTTGCTTG  
TCTTAATTGTGACAATGACTTAAATGTGACAGTGAAGTAAATTTGACAAAAGTAATACAAAATTAAGAAA  
GTTGTTAAAGTTGACTAAACAGATGTTAAATGCTAAGAAGTATGTTGCCTTGATCTTTGTTTTTATAGTATC  
TTATCAAGTGCATTAACAAATGGGTTAATAGCAAAAACAATTGACAGCAACAAGGATTTGGACATTGTTAATC  
TTGAATGGACATCAGTACAAAGTATTGAAGAACCTGGAATTCAGTTGAATGGTGACTTGAAACTTAAATGGA  
CATTGGTTTTGGACTTTATAAATGAATACTTATGTTTTGTTCAACTGTTTCTACAGACTGAAATTAGCATTGC  
ATACACTATTGTACTAATGGTAATAGGAATGTTACATGAAGTGTAAAGTGTAGTTAGTGGGTTTTAGAGCAC  
AGGCAGCACAGCTGAACGTATATCTCCTATGGTATATAAATTTGTGCAGTGAACCTGCAGTATAGAGCAGGC  
CCTGGCTGACAATCTGTAGATTTAGGCCAAATGCCAGAGTGTCTGCTGTAAGATGCCATAGACAGTCACTATTT  
ATTGGGCTGGTGGGGTCTGTTTTGGGTCTCTGTGTATTGAAATGCCAGGGTCTATTTTGAATTAGTGTCAAC  
AAAACCTTTTGATAAAAACAGAAAGAGTGAATTTATTATCTGAGGGAGAAATTTGTTATGTGAAACTAACAAAT  
GTCTGTAGACAAGCAATATGGTATAAATTGTTGTAAGTGTGAATAGGGTAATGTCATTTTATGAGTTAGTACTA  
TGATATCAATGGAGTTAGCTGAATGTTGGCTGTAAGAGAGTTTGGACAACCTCTATATGATTGAAGTGAAGCT  
TTTTAAAGACTACAAGTTAATACACAATTCTGCTGAGGGACACAGTTGTTTTATAAGAAGTCACTATTAGACTT  
GATAGTATCATCCAAGTGATTTGAATGCCCTGGGTGATTTGTGGCCTTATGGGTGGAATTTGTGGCTACTAG  
TGATAGACTGATATTTTAGAAAAGCATTGGCAGAATGTGTATTGAGGTTAAAACCTCTGCTGAAAGGAATTCAG  
TTGTCAATTTGGTCTATAAGAGGGGGTAAGGTAGAAAACAAAGTGCATGGCAGATACATAAATATAGTAAACATA  
TTGCTTATCAAAGAGGCACTGTTTAACTATGTGAGCTGTAAAGCCTGCAATGAAACCTGCCCTTGGCCTAATT  
GATTTGAGCAGCTGATAGCCTATAATGAAAATGCAGAGCAAGAGGGATGCCTATACATGTTTGCCTCATGTTT  
GCCCAAGATATGTATCTACAAGTAGACACAGATTTTCTCACTGGACAGAAATCATTATAGAGGTGTTTTATGA  
CTTGGGATGTAGGTGAGATTTGTTTAACTTTTTGTTAAATGTAGTGTCTTTCAGTCAGAATTTACAGTAATTA  
TTGTTTTATTTGTTTGGGTAATGGGACAACCAGTGAATGCATATATTGCATTGAATGCAGCATTGTATGTTA  
TCTGTATTAGAGGACTTACCAATTTGTATACTGTTGGTTATTATTATCAAATCAGTATATTTTGTAAATCAAG

GGGTGGAATGTAGCACGGTGGATTTTCTATTGATTTTATGATTTACAATATATACATCTGCTTTGACATATGA  
ATCAAATCTTAGGTTTGGAGTCAAGTAAAAGCAGCAGATTTTGGGACAGCTATTGTCTAGTGTTC AAGGTACAA  
TGTTTTTGTCTATGTATATTGCTGGGTAAACAGTAAACACAGGTATTGTTACCCAGCAAATATCCTTGGAAT  
AAACAAACAGACAGCATATAGACAATACACTTTATGTACAACATATTTGAGCAACAAATAAGGCCTTCTAAGT  
CTAGTTAATAGGTTTTGTCATGACAAAAGTTTGTACACAAGTCAGCACTTGGTGTGGGGGTTTGCTAAGAA  
CTCTACTATAAAAAGGAGCCTCCACCATGTGTGCGGAGCTTCGCCTAGGACTCCTGAATGAGTGCCGGGACAT  
TTGGATCATCGCTTGGTTATCGGGAACCTGAAGGTCTTGCGCCAAAGGTTGTGGGGCTCCCGATTGTGCTGA  
ATTGTGCAGAACTGGCTATACTTGTAACTAATCATACTAAGATAAGTAAATCTATTTAATTCTATTATTACTT  
GTGTGTGTGTAAGTTATTGCTCACTAACAGTCTATCAGAAGGTTTAATCATTGATCCTGCATATTTATTAATA  
TTTGTCAATTAATGTCAATTAATACAAATTATTAATATTAATAAAGGTTTACCCCTTTATTACA

>Xt-S5\_CM004447.2:144579405-144575357\_ *Xenopus tropicalis* strain Nigerian  
chromosome 5, whole genome shotgun sequence

TGTAGCACGGTGGATTTTATTTTGGATTTTATAATGATTTACATTATATATCTGCTTTGACATATGAATCAAAT  
CTTAGGTTTGGAGTCAAGTAAAAGCAGCAGATTTTGGGACAGTTATTGTCCAGTGTTC AAGGTACAATGTCTTT  
GTTCTATGTATATTGCTGGGTAAACAGTAAACACAGGTATTGTTAGCAAATATCCTTGGAATAAACAAACAGA  
CAGCATATAGACAATACACTTTATGTACAACCTTATTTGAGAAACAAATAAGGCCTTCTACAAAGTTAGTAAAC  
TGTCTAGTTAATAGGTTTTGTTTCATGACAAAAGTTTGTACACAAGTCAGCACTTGGTGTGGGGGTTTTGCTA  
AGAACTCTAGTATAAAAAGGAGCCTCCACCATATGTCAGTAGCTTCGCCTAGGACTCCTGAACGAGTGCCGGG  
ACAATTGGATCATCGCTTGGTTATCGGGAACCTGAAGGTCTTGCGCCAAAGGTTGTGGGGCTCCCGATTGTG  
CTGAATTGTGCAGAACTGGCTATACTTGTAACTAATCATACTAAGATAAGTAAATCTATTTAATTCTATTATT  
ACTTGTGTGTGTGTAAGTTATTGCTCACTAACAGTCTATCAGAAGGCTTAATCATTGATCCTGCATATTTATT  
AATATTTGTCATTAATGTCAATAAATACAAATTATTAATATTAATAAAGGTTTACCCCTTTATTACACTTGG  
CGTAGTCGGCAGGATTAACCTTTTGGATGCTGGGAAGTGCAGTAATAACTTGTATAGAAATTTGTAGAATTTAT  
AGTGCAGCTTTGTATGGTAGTGTAGTGGCAGTATTGTAGTGGCTTGTGCAGGGCAAACATACTGTTGAAAGTT  
AGCAATAATGTTCTGTTGGTTGAAAAACAAAGTTAGAGGGGTAGATGATCAAACGAGCAACCTTCCCACATGG  
GCTAGTTCGGGACCCTGGACCCATGTTGCTCGGGATGTGATAGGAGATCAGCAACTCTCTCAGGTGACTCGCC  
CCCATCACCTGTTGCTGAATTTGGATTTGTCTATGTGTTCCAAGGAGCAGAAGTCCCTCAGCACAATTGGGTTG  
GTTGTGTTTTTTCAGGCGCTCAGGGAGGAGACAGTCCAAAGGGAGGCAGTTGAGCTTGTAGCTGCAGGCAGTTAAA  
GATCAACTAGCCACAATGAGAGAATGTTTTCGCTCCTCATTAGCACACAATGAGGAGTTGGAGATAGAATTTA  
CAAATATGTGGTAAAGAACTATGAGTAAAAGCACCATAGAAAAGAGACAGAACAAGCAGAAAATGGTGTATT  
AGTTAAAGTAAGAACTCTTGTAAAGTAAAAGAGACTAAGGGAGTGATTTATTTCTCAAGATAGAGAAACAAAT  
AAATGTTACATTGTGTTAATTGTACTGTATGTTAATGTCATATGTTTTCTGTTTTCAGGATTTAAGAATCTGA  
TTATTTTGGATTAATATGGTTTTTAAATAACAGGCATCAAGAGTTGATGGATCCATTATTTTTGACACTTTTTG  
TTTTGTTTTTTTTAGTGCACAAATTTGTGCGTAAAGGCCTTAAGACATGTCTGTTTTTGTAAAAAAAAGT  
TTAACAATGAACTTGAAAAGTTTTTAACTTTTTTGTGTATGTTTCTGAGAATGTGTGGGCCCACATGCATG  
TTGTTATGGTTTTGCTTGTCTTAATTGTGACAATGACTTAAATGTGACAGTGACTGAAGAATTTCTTGACAAAG  
TAATACAAAATTAAGAAAAGTTGTTAAAGTTGACAAAAACAGATCTTAAATGCTAAGAACTGATGTTGCCTTGA  
TCTTTTGTTTTATAGATGTTTATCAAGTGCATTAACAAATGGGTTAATAGCAAAAACAAATGGACAGCAAAACAAG  
GATTTGGACATTGTTTATCTTCAATGGACATCAGTACAAAAGTATTGAAGAACCTGGAATTCATTTGAATGGTG  
ACCTGGAAACTTAAATGGACATTGGTTTTGGACTTTATAAATGAATATTTATGTTTTGTCAACTGTTTCTAC  
CGGCTGAAATTAGCATTGCATACACTATTGTACTAATGGTAATAGGAATGTTATGGCTTGTACATGAACTGT  
AAAGTGCTAGTTAGTGGGTTCTAGAGCACAGGCAGCACAGCTGAACTGTATATCTCTTATGGTATATGATATT  
GTGCAGTGAACCTGCAGTATAGAGCAGGCCCTGGCTGACAATCTGTAGATTTAGGCAAAATGCCAGAGGGGCTG  
CTGTAAGATGCCATAGACAGTCACTATTTATTGGGCTGGTGGGGTCTGTTTGGGTCTCTGTGTATTTGAAATG  
CCAGGGTCTATTTTGAATTAGTGTCAACAAAACCTCTTTGATAAAACAGAAAGAGTGAAATTTAATATTCTGA  
GGGAGAAATTTGTTATGTGAACTAACAAATGTCTGTAGACAAGCATTATGGTATAATTTGTTGTAAGTGTGAATA  
GGGTAATGTAATTTTATGAGTTAGTACTATGATATCAATGGAGTTAGCTGAATGTTGGCTGTAAGAGAGTTTG  
GACAACTCTATATGATTGAAGTGAAGCTTTTTAAAGACTACAAGTTAATACACAATTTCTGCTGAGGGACACG  
TTAGTTTACAAGAAGTCACTGTTAGACTTGATAGTATCATCCCAAGTGATTTGAATGCCCTGGGTGATTTGTG  
GCCTTATGGGTGGAATTTGTGGCTACTGGTGATAGACATATTTTGGAAAAGCATTGGCAGAATGTGTACTGAG  
GCTAAAACCTCTGCTGAAAGGAATTCAGTTGCCATTTGGTCTATAAGAGGGGGGTTAGGTAGAAACAAAGTGCA  
TGGCAGATACATAATATAGTAAACATATTGCTTATCAAAGAAGCACTGTTTAACTATGTGAGCTGTAAAGCCT  
GCAATGAAACCTGCCCTTGGCCTAATTGTTTTGAGCAGCTGATAGTCTGTAATGAAAATGCAGAGCAAGAGGG

ATTCCTATACATGTTTGCCACATGATTGCCCATGATATGTATCTACAAGTAGACACAGATTTTCTCACTGGAC  
AGAAATCATTATAGAGATGTTTTATGACTTGGGATGTAGGTGAGATTTGTTAATCTTTTGTTAAATCTAGTG  
TCCTTCAGTCAGTATTACAGTCATTAATTGTTTATTTGTTTATGGTAATGGGGACAACCAGTGAATGCATATA  
TTGCATTGAATGCAGCATTGTATGTTATCTGTATTAGAGGACTTACCAATTTGTATACTGTTGGTTATTATTA  
TCAAATCAGTATATTTTGTAAATCAAGGGGTGGAATGTAGCACGGTGGATTTTATTTTGATTTTATAATGATT  
TACATTATATATCTGCTTTGACATATGAATCAAATCTTAGGTTTGAGTCAAGTAAAAGCAGCAGATTTTGGGA  
CAGTTATTGTCCAGTGTCAAGGTACAATGTCTTTGTTCTATGTATATTGCTGGGTAAACAGTAAACACAGGT  
ATTGTTACCCAGCAAATATCCTTGAATAAAACAAACAGACAGCATATAGACAATACACTTTATGTACAACCTTA  
TTTGAGAAACAAATAAGGCTTTCTACAAAGTTAGTAAACTGTCTAGTTAATAGGTTTTGTTTCATGACAAAAGT  
TTGTACACAAGTCAGCACTTGGTGTGGGGGTTTTGCTAAGAACTCTAGTATAAAAAGGAAGCCTCCACCATGT  
GTCAGTAGCTTCGCCTGGGACTCCTGAACGAGTGCCGGGACAATTGGATCATCGCTTGGTTATCGGGAACCTG  
AAGGTCTTGCGCCAAAGGTTGTGGGGCTCCCCGATTGTGCTGAATTGTGCAGAAGTGGCTATACTTGTAACTA  
ATCATACTAAGATAAGTAAATCTATTTAATTCTATTATTACTTGTGTGTGTGTAAGTTATTGCTCACTAACAG  
TCTATCAGAAGGCTTAATCATTGATCCTGCATATTTATTAATATTTGTCATTAATGTCAATTAATACAAATTA  
TTAATATTAATAAAGGCTCACCCCTTTATTACA

>Xt-S6\_CM004450.2:74753455-74757497\_ *Xenopus tropicalis* strain Nigerian  
chromosome 8, whole genome shotgun sequence

TGTAGCACGGTGGATTTTATTTTTATTTTATAATGATTTACATTATATATCTGCTTTGACATATGAATCAAAT  
CTTAGGTTTGGAGTCAAGTAAAACCAGCAGATTTTGGGACATCTATTGTCCAGTGTTCAGGTACAATGTCTTT  
GTTCTATGTATATTGCTGGGTAAACAGTAAACACAGGTATTGTTACCCAGCAAATATCCTTGAATAAAACAA  
CAGACAGCATATAGACAATACACTTTATGTACAACCTTATTGAGAAACAAATAAGGCTTTCTACAAAGTTAGT  
AAACTGTCTAGTTAATAGGTTTTGTTTCATGACAAAAGTTTGTACACAAGTTAGCACTTGGTGTGGGGGTTG  
CTAAGAACTCTAGTATAAAAAAGGAGCCTCCACCATGGGTGAGTAGCTTCGCCTAGGACTCCTGAACGAGTGC  
CGGGATATTTGGATCATCGCTTGGTTATCGGGAACCTGAAGGTCTTGCGCCAAAGGTTGTGGGGCTCCCCGAT  
TGTGCTGAATTGTGCAGAAGTGGCTACACTTGTAACTAATCATACTAAGATAAGTAAATCTATTTGATTCTAT  
TATTACTTGTGTGTGTGTAAGTTATTGCTCACTAACAGTCTATCAGAAGGCTTAATCATTGATCCTGCATATT  
TATTAATATTTGTCATTAATGTCAATTAATACAAATTATTAATATTAATAAAGGTTTACCCCTTTATTACAT  
TTGGCGTAGTCGGCAGGATTAACCCTTTTGATGCTGGGAAGTGCAGTAATAACTTGTATAGAAATTGTAGAAT  
TTATAGTGCAGCTTTGTATGGTAGTGTAGTGGCAGTATTGTAGTGGCTTGTGCAGGGCAAACATACTGTTGAA  
AGTTAGCAATAATGTTCTGTTGGTTGAAAAACAAAGTTAGAGGGGTAGATGATCAAACGAGCAACCTTCCCAC  
ATGGGCTAGTTCGGGACCTGGACCCATGTTGCTCGGGATGTGATAGGAGATCAGCAACTCTCTCAGGTGACT  
CACCCCATCACCTGTTGCTGAATTTGGATTTGTCTATGTGTTCCAAGGAGCTGAAGTCCCTCAGCACAATTGG  
GTTGGTTGTGTTTTTACAGGCGCTCAGGGAGGAGACAGTCCAAAGGGAGGCAGTTGAGCTTGAGCTGCAGGCAGT  
TAAAGATCAACTAGCCACAATGAGAGAATGTTTGCCTCCTCATTAGCACACAATGAGGAGTTGGAGATAGAA  
TTTACAAAATATGTGGTAAAGAACTATGAGTAAAAAGCACCATAGAAAAGGGACAGAACAAGCAGAAAATGGTG  
TATTAGTTAAAGTAAGAACTCTTGTAAAGTAAAGAGACTAAGGGAGTGATTTATTTCTCAAGATAGAGAAACA  
AAGTAAATGTTACATTGTGTTAAATTTGACTGTATGTTAATGTCATATGTTTTTCTGTTTACAGGATTAAGAA  
TCTGATTATTTTGGAGTAAATATGGTTTTTGGATAACAGGCATCAAGAGTTGATGGATCCATTATTTTTGACACT  
TTTTGTTTTGTTTTTAAAGTGCACAAATTTGTGCGTAAAGGCCCTTAAGACATGTCTGTTTTTGTAAAAAAA  
AGTTTAACAATGAAACTTGAAAGTTTTTAACTTTTTGTTGTATGTTTCTGAGAATGTGTGGGCCACATGC  
ATGTTGTTATGGTTTTGCTTGTCTTAATTTGTGACAATGACTTAAATGTGACAGTGAAGTAAATTTCTTGACA  
AAGTAATACAAAATTAAGAAAAGTTGTTAAAGTTGACAAAACAGATCTTAAATGCTAAGAAGTGAATGTTGCCTT  
GATCTTTTGTTTTATAGATGTTTATCATGGATATAACAAGTGCATTAACAAATGGGTTAATAGCAAACAATG  
GACAGCAAACAAGGATTTGGACATTGTTAATCTTGAATGGACATCAGTACAAAGTATTGAAGAACCTGGAATT  
CATTGAATGGTGACCTGGAACTTAAATGGACATTGGTTTTTGGACTTTATAAATGAATACCTTATGTTTTGTT  
CAACTGTTTCTACAGACTGAAATTAGCATTGCATACACTATTGTACTAATGGTAATAGGAATGTTATGGCTTG  
TTACATGAACTGTAAAGTGTAGTTAGTGGGTTTTAGAGCACAGGCAGCACAGCTGAACTGTATATCTCCTAT  
GGTATATAATATTGTGCAGTGAACCTGCAGTATAGAGAAGGCCCTGGCTGACAATCTGTAGATGCAGGCAAT  
GCCAGAGGTAAGTGTAAAGTGCAGACAGTCACTATCTATTGGGCTGGTGGGGGCTGTTTGGGTCTTTGTG  
TATTTGAAATGCCAGGGCTATTTTGAATTTAGTGTCAACGAACTCTTTGATAAAAACAGAAAGAGTGAATTT  
TATTATTCTGAGGGAGAAAATATTATGTGAAACTGACAATGTCTGTAGACAAGTATTATGGTATAAGTAATTA  
TTGTAAGTGTGAATACGGTAATGTTATTTTGTGAGTTAGTACTGTGATGTCAATGGGGTTGGCTGAAGGAGAG  
TTTAGACAACCTATATGATTGAAGTTAAAGACTACAACCTAATATACAATTCTGTTGAGGGACACAGTAGTT

TATAAGAAGTCACTGTTAGACTTGATAGTATCATCCCAAGTGATTTGAATGCCCTGTGTGATTTGTGGCCTTA  
TGGGTGGAATTTGTGGCTACTAGTGATAGACATATTTTGGAAAAGCATTGGCAGAATGTGTACTGAGGCTAAA  
ACTCTGCTGAAAGGAATTCAGTTGCCATTTGGTCTATAAGAGGGGGTTAGGTAGAAAACAAAGTGCATGGCAG  
ATACATAATATAGTAAACATATTGCTTATCAAAGAAGCACTGTTTACCTAAGTGAGCTGTAAAGCCTGCAATG  
AAACCTGCCCTTGGCCTAATTGTTTTGAGCAGCTGATAGTCTGTAATGAAAATGCAGAGCAAGAGGGATTCCCT  
ATACATGTTTGGCACATGATTGCCCATGATATGTATCTACAAGTAGACACAGATTTTCTCACTGGACAGAAAT  
CATTATAGAGATGTTTTATGACTTGGGATGTAGGTGAGATTTGTTAATCTTTTGTAAATCTAGTGTCCCTC  
AGTCAGAATTACAGTCATTAATTGTTTATTTGTTTATGTAATGGGGACAACCAGTGAATGCATATATTGCAT  
TGAATGCAGCATTGTATGTTATCTGTATTAGAGGACTTACCAATTTGTATACTGTTGGTTATTATTATCAAAAT  
CAGTATATTTTGTAAATCAAGGGGTGGAATGTAGCACGGTGGATTTTATTTTTATTTTATAATGATTTACATT  
ATATATCTGCTTTGACATATGAATCAAATCTTAGGTTTGAGTCAAGTAAAACCAGCAGATTTTGGGACATCTA  
TTGTCCAGTGTTC AAGGTACAATGTCTTTGTTCTATGTATATTGCTGGGTAAACAGTAAACACAGGTATTGTT  
ACCCAGCAAATATCCTTGGAAATAAACAAACAGACAGCATATAGACAATACACTTTATGTACAACCTATTTGAG  
AAACAAATAAGGCTTTCTACAAAGTTAGTAAACTGTCTAGTTAATAGGTTTTGTTTCATGACAAAAGTTTGTAC  
ACAAGTTAGCACTTGGTGTGGGGGTTTGTCTAAGAACTCTAGTATAAAAAAGGAGCCTCCACCATGGGTGAGT  
AGCTTCGCCTAGGACTCCTGAACGAGTGCCGGGATATTTGGATCATCGCTTGGTTATCGGGAACCTGAAGGTC  
TTGCGCCAAAGGTTGTGGGGCTCCCCGATTGTGCTGAATTGTGCAGAACTGGCTACACTGTAACCTAATCATA  
CTAAGATAAGTAAATCTATTTGATTCTATTATTACTTGTGTGTGTGTAAGTTATTGCTCACTAACAGTCTATC  
AGAAGGCTTAATCATTGATCCTGCATATTTATTAATATTTGTCATTAATGTCAATTAATACAAATTATTAATA  
TTAATAAAGGTTACCCCTTTATTACA

>Xt-S7\_CM004451.2:78972808-78976805\_ *Xenopus tropicalis* strain Nigerian  
chromosome 9, whole genome shotgun sequence

TGTAGCACGGTGGATTTTATTTGATTTTATAATGATTTACAATATACATCTGCTTTGACATATGAATCAAAT  
CTTAGGTTTTGAGTCAAGTTAAAGCAGCAGATTTTGGGACAGCTATTGTCCAGTGTTC AAGGTACAATGTCTTT  
GTTTTTTTTGTATATTGCTGGGTAAACAGTAAACACAGGTATTGTTACCCAGCAAATATCCTTGGAAATAACAA  
ACAGACAGCATATAGACAATACACTTTAGGTACAACCTATTTGAGCAACAAATAAGGCCCTTAGTTAATAGATT  
TTGTTTCATGACAAAAGTTTGTACACAAGTCAGCACTTGGTGTGGGGGTTTTGCTAAGAACTCTAGTATAAAA  
AGGAGCCTCCACCATGGGTGAGTAGCTTCGCCTAGGACTCCTGAACGAGTGCCGGGACAATTGGATCATCGCT  
TGGTTATCGGGAACCTGAAGGTCCTGCGCCAAAGGTTGTGGGGCTCCCCGATTGTGCTGAATTGTGCAGAACT  
GGCTATACTTGTAACTAATCATACTAAGATAAGTAAATCTATTTGATTCTATTATTACTTGTGTGTGTGTAAG  
TTATTGCTCTATCAGAAAGGCTTAATCATTGATCCTGCATATTTATTAATATTTGTCATTAATGTCAATTAATA  
CAAATTATTAATATTAATAAAGGTTACCCCTTTATTACATTTGGCGTAGTCGGCAGGATTAACCTTTTTTGA  
TGCTGGGAAGTGCAGTAATAATTTGTATAGAAATTTGAGAATTTATAGTGTAGCTTTGTATGGTAGTGTAGTG  
GCAGTATTGTAGTGGCTTGTGCAGGGCAAACATACTGTTGAAAGTTAGCAATAATGTTTTGTTGGTTGAAAAA  
CAAATTAGAGGGGTAGATGATCAAACGAGCAACCTTCCCACATGGGCTAGTTCGGGACCTGGACCCATGTT  
GCTCGGGATGTGATAGGAGATCAGCAACTCTCTCAGGTGACTCACCCCATCACCTGTTGCTGAATTTGGATT  
TGTCTATGTGTTCCAAGGAGCTGAAGTCCTCAGCACAAATGGGTTGGTTGTGTTTTCAGGCGCTCAGGGAGGA  
GACAGTCCAAAGGGAGGCAGTTGAGCTTGAAGTCAACTAGCCACAATGAGAGAATGT  
TTGCGCTCCTCATTAGCACACAATGAGGAGTTGGAGATAGAATTTACAAAATATGTGGTAAGAACTATGAGTA  
AAAAGCACCATAGAAAAGGGACAGAACAAGCAGAAAAATGGTGTATTAGTTAAAGTAAGAACTCTTGTAAAGTAA  
AAGAGACTAAGGGAGTGATTTATTTCTCAAGATAGAGAAAACAAATAAATGTTACATTGTGTTAAATTTGACT  
GTATGTTAATGTCAATATGTTTTCTGTTTCAGGATTTAAGAATCTGATTATTTTGAAGTTAATATGGTTTTTGA  
TAACAGGCATCAAGAGTTGATGGATCCATTATTTTTGACACTTTTTGTTTTGTTTTTAAAGTGCACAAATTTG  
TGCGTAAAGGCCTTAAGACATGTCTGTTTTGTTAAAAAAAAGTTAACAATGAAACTTGAAAGTTTAAACA  
CTTTTTGTTGTATGTTTCTGAGAATGTGTGGGCCACATGCATGTTGTTATGGTTTTGCTTGTCTTAATTTGTG  
ACAATGACTTAAATGTGACAGTGACTGAAGAATCTTGACAAAGTAATACAAAATTAAGAAAGTTGTTAAAT  
TGACAAAACAGATCTTAAATGCTAAGAATTGATGTTGCCCTTGATCTTTTGTTTTATAGATGTTTATCATGGAT  
ATAACAAGTGCATTAACAAATGGGTTAATAGCAAAAACAAATGGACAGCAACAAGGATTTGGACATTGTTAATC  
TTGAATGGACATCAGTACAAAGTATTGAAGAACCTGGAATTCATTTGAATGGTGACCTGGAACTTAAATGGA  
CATTGGTTTTGGACTTTATAAATTAATATTTATGTTTTGTTCAATTGTTTCTACCGGCTGAAATTAGCATTGC  
ATACACTATTGTACTAATGGTAATAGGAATGATATGGCTTGTACATGAACTGTAAAGTGTAGTAAAGTGGGT  
TTTAGAGCACAGGCAGCACAGCTGAACTGTATATCTCCTATGGTATATAATATTGTGCAGTGAACCTGCAGTA  
TAGAGCAGGCCCTGGCTGACAATCTATAGATTTAGGCAAATGCCAGAGGGGCTGCTGTAAGATGCCATAGACA



GTCACTATTTATTGGGCTGGTGGGGTCTGTTTGGGTCTCTGTGTATTTGAAATGCCAGGGTCTATTTTGAAT  
TAGTGTCAACAAAACCTCTTTGATAAAAACAGAAAGAGTGAAATTTATTATTCTGAGGGAGTAATTGTTATGTGA  
AACTAACAATGTCTGTAGACAAGCATTATGGTATAAATTGTTGTAAGTGTGAATAGGGTAATGTAATTTTATGA  
GTTAGTACTATGATATCAATGGAGTTAGCTGAATGTTGGCTGTAAGAGAGTTTGGACAATGCTATATGATTGA  
ATTGAAAGCCTTTTAAAGACTACAAGTTAATATACAACCTGCTGAGGGACACGTTAGTTTACAAGAAGTCAC  
TGTTAGACTTGATAGTATCATCCCAAGTGATTTGAATGCCCTGGGTGATTTGTGGCCTTATGGGTGGAATTTG  
TGGCTACTGGTGATAGACATATTTTGGAAAAGCATTGGCAGAATGTGTACTGAGGCTACAATTCTGCTGAAAG  
GAATTCAGTTGCCATTTGGTATATAAAAAGGGGGTTAGGTACAAACAAAGTGCATGGCAGATACATAATATAGT  
AAACATTTTGTCTTATCAAAGAAGCACTGTTTAACTATGTGAGCTGTAAAGCCTGCAAGGTAACCTGCCCTTGG  
CCTAATTGTTTTGAGCAGCTGATGGTCTATAATGAAAATGCAGAGCAAGAGGGGTGCCTATACATGTTTGCCA  
CATGTTTGGCCAAGATATGTATCTACAAGTAGACACAGATTTTCTCACTGGACAGAAATCATTTTAGAGGTGT  
TTTATGACTTGGGATGTAGGTGAGATTTGTTTAACTCTTTGTTAAATGTAGTGTCTTCAGTCAGAATTACAG  
TAATTAATTGTTTATTTGTTTAGGGTAATGGGGACAACCAGTAAATGCATATATTGCATTGAATGCAGCATTG  
TATGTTATCTGTATTAGAGGACTTACCAATTTGTATACTGTTGGTTATTATTATCAAATCAGTATATTTTGT  
AATCAAGGGGTGGAATGTAGCACGGTGGATTTTATTTTGAATTTTATAATGATTTACAATATACATCTGCTTTG  
ACATATGAATCAAATCTTAGGTTTGTAGTCAAGTTAAAGCAGCAGATTTTGGGACAGCTATTGTCCAGTGTTC  
AGGTACAATGTCTTTGTTTTTTTGTATATTGCTGGGTAAACAGTAAACACAGGTATTGTTACCCAGCAAATAT  
CCTTGGAAATAAAACAAACAGACAGCATATAGACAATACACTTTAGGTACAACCTTATTTGAGCAACAAATAAGGC  
CTTAGTTAATAGATTTTGTTCATGACAAAAGTTTGTACACAAGTCAGCACTTGGTGTGGGGGTTTTGCTAAG  
AACTCTAGTATAAAAAGGAGCCTCCACCATGGGTGAGTAGCTTCGCCTAGGACTCCTGAACGAGTGCCGGGAC  
AATTGGATCATCGCTTGGTTATCGGGAACCTGAAGGTCTTGCGCCAAAGGTTGTGGGGCTCCCGATTGTGCT  
GAATTGTGCAGAAGTGGCTATACTTGTAACTAATCATACTAAGATAAGTAAATCTATTTGATTCTATTATTAC  
TTGTGTGTGTGAAGTTATTGCTCTATCAGAAGGCTTAATCATTGATCCTGCATATTTATTAATATTTGTCAT  
TAATGTCAATTAATACAAATTTATTAATATTAATAAAGGTTACCCCTTTATTACA

>Xt-S8\_CM004452.2:5826453-5822436\_ *Xenopus tropicalis* strain Nigerian  
chromosome 10, whole genome shotgun sequence

TGTAGCACGGTGGATTTTATTTGATTTTATAATGATTTACAATATACATCTGCTTTGACATATGAATCAAAT  
CTTAGGTTTGTAGTCAAGTTAAAGCAGCAGATTTTGGGACAGCTATTGTCCAGTGTTCAGGTACAATGTCTTT  
GTTTTTTTGTATATTGCTGGGTAAACAGTAAACACAGGTATTGTTACCCAGCAAATATCCTTGGAAATAACAA  
ACAGACAGCATATAGACAATACACTTTAGGTACAACCTTATTTGAGCAACAAATAAGGCCCTTAGTTAATAGATT  
TTGTTTCATGACAAAAGTTTGTACACAAGTCAGCACTTGGTGTGGGGGTTTTGCTAAGAAGTCTAGTATAAAA  
AGGAGCCTCCACCATGGGTGAGTAGCTTCGCCTAGGACTCCTGAACGAGTGCCGGGACAATTGGATCATCGAT  
TGGTTATCGGGAACCTGAAGGTCTTGCGCCAAAGGTTGTGGGGCTCCCGATTGTGCTGAATTTATACAGAAC  
TGGCTATACTTGTAACTAATCATACTAAGATAAGTAAATCTATTTGATTCTATTATTACTTGTGTGTGTGTAA  
GTTATTGCTCACTAACAGTTTATCAGAAGGTTAATCATTGATCCTGCATATTTATTAATATTTGTCATTAAT  
GTCAATTAATACAAATTTATTAATATTAATAAAGGTTCCCCCTTTATTACATTTGGCGTAGTCGGCAGGATTA  
ACCTTTTTGATGCTGGGAAGTGCAGTAATAATTTGTATAGAAATTTGTAGAATTTATAGTGTAGCTTTGTATGG  
TAGTGTAGTGGCAGTATTGTAGTGGCTTGTGCAGGGCAACATACTGTTGAAAGTTAGCAATAATGTTCTGTT  
GGTTGAAAACAAAATTAGAGGGGTAGATGATCAAACGAGCAACCTTCCCACATGGGCTAGTTCCGGACCCTG  
GACCCATGTTGCTCGGGATGTGATAGGAGATCAGCAACTCTCTCAGGTGACTCACCCCATCACCTGTTGCTG  
AATTTGGATTTGTCTATGTGTTCCAAGGAGCTGAAGTCTCAGCACAATTGGGTTGGTTGTGTTTTTCAGGCGC  
TCAGGGAGGAGACAGTCCAAGGGAGGCAGTTGAGCTTGCAGGTCAGGCAAGTAAAGATCAACTAGCCACAAT  
GAGAGAATGTTTGCCTCCTCATTAGCACACAATGAGGAGTTGGAGATAGAATTTACAAAATATGTGGTAAGA  
ACTATGAGTAAAAGCACCATAGAAAAGGGACAGAACAAGCAGAAAATGGTGTATTAGTTAAAGTAAGAAGTCT  
TTGTAAGTAAAAGAGACTAAGGGAGTGATTTATTTCTCAAGATAGAGAAAACAAAATAAATGTTACATTGTGTT  
AAATTGTACTGTATGTTAATGTCATATGTTTTCTGTTTTCAGGATTTAAGAATCTGATATTTTGTAGTTAATA  
TGGTTTTTGTATAACAGGCATCAAGAGTTGATGGATCCATATTTTTGACACTTTTTGTTTTGTTTTTAAAGTG  
CACAAATTTGTGCGTAAAGGCCTTAAGACATGTCTGTTTTGTTAAAAAAAAGTTTAAACAATGAACTTGAAA  
GTTTTAAACACTTTTTGTTGTATGTTTCTGAGAATGTGTGGGCCACATGCATGTTGTTATGGTTTTGTCTTGT  
CTTAATTGTGACAATGACTTAAATGTGACAGTGACTGAAGAATCTTGACAAAGTAATACAAAATTAAGAAAG  
TTGTTAAAATTGACAAAACAGATCTTAAATGCTAAGAATTTGATGTTGCCTTGATCTTTTGTTTTTATAGATGTT  
TATCATGGATATAACAAGTGCATTAACAAATGGGTAAATAGCAAACAATGGACAGCAAACAAGGATTTGGAC  
ATTGTTAATCTTGAATGGACATCAGTACAAAGTATTGAAGAACCCTGGAATTCATTTGAATGGTGCCTGGAAA

CTTAAATGGACATTGGTTTTGGACTTTATAAATTAATATTTATGTTTTGTTCAATTGTTTCTACCGGCTGAAA  
TTAGCATTGCATACACTATTGTACTAATGGTAATAGGAATGATATGGCTTGTACATGAACTGTAAAGTGCTA  
GTAAGTGGGTTTTAGAGCACAGGCAGCACAGCTGAACTGTATATCTCCTATGGTATATAATATTGTGCAGTGA  
ACCTGCAGTATAGAGCAGGCCCTGGCTGACAATCTATAGATTTAGGCAAATGCCAGAGGTGCTGCTGTAAGAT  
GCCATAGACAGTCACTATTTATTGGGCTGGTGGGGTCTGTTTGGGTCTCTGTGTATTTGAAATGCCAGGGTCT  
ATTTTGAATTAGTGTCAACAAAACCTTTTGATAAAAACAGAAAGAGTGAATTTTATTATCTGAGGGAGTAAT  
TGTTATGTGAAACTAACAATGTCTGTAGACAAGCATTATGGTATAATTGTTGTAAGTGTGAATAGGGTAATGT  
AATTTTATGAGTTAGTACTATGATATCAATGGAGTTAGCTGAATGTTGGCTGTAAGAGAGTTTGGACAATGCT  
ATATGATTGAATTGAAAGCCTTTTAAAGACTACAAGTTAGTATACAACTCTGCTGAGGGACACGTTAGTTTAC  
AGAAGTCACTGTTAGACTTGATAGTATCATCCCAAGTGATTTGAATGCCCTGGGTGATTTGTGGCCTTATGG  
GTGGAATTTGTGGCTACTGGTGATAGACATATTTTGGAAAAGCATTGGCAGAATGTGTACTGAGGCTACAATT  
CTGCTGAAAGGAATTCAGTTGCCATTTGGTATATAAAAAGGGGTTAGGTACAAACAAAGTGCATGGCAGATAC  
ATAATATAGTAAACATTTTGCCTTATCAAAGAAGCACTGTTTAACTATGTGAGCTGTAAAGCCTGCAAGGTAAC  
CTGCCCTTGGCCTAATTGTTTTGAGCAGCTGATGGTCTATAATGAAAATGCAGAGCAAGAGGGGTGCCTATAC  
ATGTTTGGCCACATGTTTGCCTAAGATATGTATCTACAAGTAGACACAGATTTTCTCACTGGACAGAAATCATT  
TTAGAGGTGTTTTATGACTTGGGATGTAGGTGAGATTTGTTTAACTTTTTGTTAAATGTAGTGTCCCTTCAGTC  
AGAATTACAGTAATTAATTGTTTATTTGTTTGGGTAATGGGGACAACCAGTAAATGCATATATTGCATTGAA  
TGCAGCATTGTATGTTATCTGTATTAGAGGACTTACCAATTTGTATACTGTTGGTTATTATTATCAAATCAGT  
ATATTTTGTAAATCAAGGGGTGGAATGTAGCACGGTGGATTTTATTTTGTATTTTATAATGATTTACAATATAC  
ATCTGCTTTGACATATGAATCAAATCTTAGGTTTGTAGTCAAGTTAAAGCAGCAGATTTTGGGACAGCTATTGT  
CCAGTGTTCAGGTACAATGTCTTTGTTTTTTTGTATATTGCTGGGTAACAGTAAACACAGGTATTGTTACC  
CAGCAAATATCCTTGAATAAACAACAGACAGCATATAGACAATACACTTTAGGTACAACCTATTTGAGCAA  
CAAATAAGGCCTTAGTTAATAGATTTTGTTCATGACAAAAGTTTGTACACAAGTCAGCACTTGGTGTGGGGG  
TTTTGCTAAGAAGCTAGTATAAAAAGGAGCCTCCACCATGGGTGAGTAGCTTCGCCCTAGGACTCCTGAACGA  
GTGCCGGGACAATTGGATCATCGATTGGTTATCGGGAACCTGAAGGTCTTGCGCCAAAGGTTGTGGGGCTCCC  
CGATTGTGCTGAATTTATACAGAAGCTGGCTATACTTGTAACTAATCATACTAAGATAAGTAAATCTATTTGAT  
TCTATTATTACTTGTGTGTGTGTAAGTTATTGCTCACTAACAGTTTATCAGAAGGTTTAAATCATTGATCCTGC  
ATATTTATTAATATTTGTCATTAATGTCAATTAATACAAAATTTATTAATATTAATAAAGGTTCCCCCTTTATT  
ACA

>Xt-S9\_CM004445.2:116537647-116541655\_ *Xenopus tropicalis* strain

Nigerian chromosome 3, whole genome shotgun sequence

TGTAGCACGGTGGATTTTATTTTGTATTTATAATGATTTACAATATACATCTGCTTTGACATATGAATCAAAT  
CTTAGGTTTTGAGTCAAGTTAAAGCAGCAGATTTTGGGACAGCTATTGTCCAGTGTTCAGGTACAATGTCTTT  
GTTTTTTTTGTATATTGCTGGGTAACAGTAAACACAGGTATTGTTACCCAGCAAATATCCTTGAATAAACA  
ACAGACAGCATATAGACAATACACTTTAGGTACAACCTATTTGAGCAACAAATAAGGCCTTAGTTAATAGATT  
TTGTTTCATGACAAAAGTTTGTACACAAGTCAGCACTTGGTGTGGGGGTTTTGCTAAGAAGCTAGTATAAAA  
AGGAGCCTCCACCATGGGTGAGTAGCTTCGCCCTAGGACTCCTGAACGAGTGCCGGGACAATTGGATCATCGAT  
TGGTTATCGGGAACCTGAAGGTCTTGCGCCAAAGGTTGTGGGGCTCCCCGATTGTGCTGAATTGTGCAGAACT  
GGCTATACTTGTAACTAATCATACTAAGATAAGTAAATCTATTTAATTCTATTATTACTTGTGTGTGTGTAAG  
TTATTGCTCACTAACAGTCTATCAGAAGGCTTAATCATTGATCCTGCATATTTATTAATATTTGTCATTAATG  
TCAATTAATACAAATTAATTAATTTGATAAAGGTTAACCCCTTTATTACATTTGGCGTAGTCGGCAGGATTA  
ACCCTTTTGTGCTGGGAAGTGCAGTAATAACTTGTATAGAAATTTGTAGAATTTATAGTGCAGCTTTGTATGG  
TAGTGTAGTGGCAGTATTGTAGTGGCTTGTGCAGGGCAAACATACTGTTGAAAGTTAGCAATAATGTTCTGTT  
GGTTGAAAAACAAAGTTAGAGGGGTAGATGATCAAACGAGCAACCTTCCCACATGGGCTAGTTCCGGACCCTG  
GACCCATGTTGCTCGGGATGTGATAGGAGATCAGCAACTCTCTCAGGTGACTCACCCGATCACCTGTTGCTG  
AATTTGGATTTGTCTATGTGTTCCAAGGAGCAGAAGTCTCAGCACAATTGGGTGGTTGTGTTTTTCAGGCGC  
TCAGGGAGGAGACAGTCCAAGGGAGGCAGTTGAGTTTGTAGCTGCAGGCAGTTAAAGATCAACTAGCCACAAT  
GAGAGAATGTTTGCCTCCTCATTAGCACACAATGAGGAGTTGGAGATAGAATTTACAAAATATGTGGTAAGA  
ACTATGAGTAAAAGCACCATAGAAAAGAGACAGAACAAGCAGAAAATGGTGTATTAGTTAAAGTAAGAAGCTC  
TTGTAAGTAAAAGAGACTAAGGGAGTGATTTATTTCTCAAGATAGAGAAAACAAAATAAATGTTACATTGTGTT  
TAATTGTAAGTGTATGTTAATGTCATATGTTTTCTGTTTCAGGATTTAAGAATCTGATTAATTTTGTAGTTAATAT  
GGTTTTTAATAACAGGCATCAAGAGTTGATGGATCCATTAATTTTGTACACTTTTTGTTTTTTTTTAAAGT  
GCACAAATTTGTGCGTAAAGGCCTTAAGACATGTCTGTTTTTGTAAAAAAAAGTTTAAACAATGAAACTTGA

GAGTTTTTAACACTTTTTGTTGTATGTTTCTGAGAATGTGTGGGCCACATGCATGTTGTTATGGTTTTGTCTT  
GTCTTAATTGTGACAATGACTTAAATGTGACAGTACTGAAAAATTCCTGACAAAGTAATACAAAATTAAGAA  
AGTTGTTAAAGTTGACAAAACAGATCTTAAATGCTAAGAACTGATGTTGCCTTGATCTTTTGTTTTATAGATG  
TTTATCAAGTGCATTAACAAAATGGGTTAATAGCAAAAACAATTGACAGCAAACAAGGATTTGGACATTGTTAAT  
CTTCAATGGACATCAGTACAAAGTATTGAAGAACCTGGAATTCAGTTGAATGGTACTTGGAAACTTAAATGG  
ACATTGGTTTTGGACTTTATAAATGAATACTTATGTTTTGTTCAATTGTTTCCACAGACTGAAATTAGCATTG  
CATACTATTGTACTAATGGTAATAGGAATGTTATGGCTTGTACATGAAGTGTAAAGTGCCAGTTAGTGGG  
TTTTATAGCACAGGCAGCACAGCTGAAGTGTATATCTCCTATGGTATATAATATTGTGCAGTGAACCTGCAGT  
ATAGAGCAGGCCCTGGCTGACAATCTGTAGATTTAGGCAAATGCCAGAGGTGCTGCTGTAAGATGCCATAGAC  
AGTCACTATTTATTGGGCTGGTGGGGTCTGTTTGGGCTCTGTGTATTTGAAATGCCAGGGTCTATTTTGAAA  
TTAGTGTCAACAAAACCTTTGATAAAAACAGAAAGAGTAAAATTTATTATTCTGAGGGAGTAATTGTTATGTG  
AACTAACAATGTCTGTAGACAAGCATTATGGTATAATTGTTGTAAGTGTGAATAGGGTAATGTAATTTTATG  
AGTTAGTACTATGATATCAATGGAGTTAGCTGAATGTTGGCTGTAAGAGAGTTTGGACAATGCTATATGATTG  
AATTGAAAGCCTTTTAAAGACTACAAGTTAGTATACAACTCTGCTGAGGGATACGTTAGTTTACAAGAAGTCA  
CTGTTAGACTTGATAGTATCATCCAAGTGATTTGAATGCCCTGGGTGATTTGTGGCCTTATGGGTGGAATTT  
GTGGCTACTGGTGATAGACATATTTTGGAAAAGCATTGGCAGAATGTGTACTGAGGCTACAATTCCTGCTGAAA  
GGAATTCAGTTGCCATTTGGTATATAAAAAGGGGGTTAGGTACAAACAAAGTGCATGGCAGATACATAATATAG  
TAAACATTTTGCTTATCAAAGAAGCACTGTTTAACTATGTGAGCTGTAAAGCCTACAAGGTAACCTGCCCTTG  
GCCTAATTGTTTTGAGCAGCTGATGGTCTATAATGAAAATGCAGAGCAAGAGGGGTGCCATACATGTTTGCC  
ACATGTTTGCCCAAGATATGTATCTACAAGTAGACACAGATTTTCTCACTGGACAGAAAATCATTTTAGAGGTG  
TTTTATGACTTGGGATGTAGGTGAGATTTGTTTAACTCTTTTGTAAATGTAGTGTCTTCAGTCAGAATTACA  
GTAATTAATTGTTTATTTGTTTAGGGTAATGGGGACAACCAGTAAATGCATATATTGCATTGAATGCAGCATT  
GTATGTTATCTGTATTAGAGGACTTACCAATTTGTATACTGTTGGTTATTATTATCAAAATCAGTATATTTTGT  
AAATCAAGGGGTGGAATGTAGCACGGTGGATTTTATTTGATTTTATAATGATTTACAATATACATCTGCTTT  
GACATATGAATCAAATCTTAGGTTTGAGTCAAGTTAAAGCAGCAGATTTTGGGACAGCTATTGTCCAGTGTTT  
AAGGTACAATGTCTTTGTTTTTTTGTATATTGCTGGGTAAACAGTAAACACAGGTATTGTTACCCAGCAAATA  
TCCTTGAATAAAACAAACAGACAGCATATAGACAATACACTTTAGGTACAACCTTATTTGAGCAACAAATAAGG  
CCTTAGTTAATAGATTTTGTTCATGACAAAAGTTTGTACACAAGTCAGCACTTGGTGTGGGGGTTTTGCTAA  
GAACTCTAGTATAAAAAGGAGCCTCCACCATGGGTGAGTACTTGCCTAGGACTCCTGAACGAGTGCCGGGA  
CAATTGGATCATCGATTGGTTATCGGGAACCTGAAGGTCTTGCGCCAAAGGTTGTGGGGCTCCCCGATTGTGC  
TGAATTGTGCAGAACTGGCTATACTTGTAACTAATCATACTAAGATAAGTAAATCTATTTAATTCTATTATTA  
CTTGTGTGTGTGTAAGTTATTGCTCACTAACAGTCTATCAGAAGGCTTAATCATTGATCCTGCATATTTATTA  
ATATTTGTCATTAATGTCAATTAATACAAATTATTAATATTGATAAAGGTTAACCCCTTTATTACA

>Xt-S10\_CM004447.2:151155029-151151033\_ *Xenopus tropicalis* strain  
Nigerian chromosome 5, whole genome shotgun sequence

TGTAGCACGGTGGATTTTATTTGATTTTATAATGATTTACAATATACATCTGCTTTGACATATGAATCAAAT  
CTTAGGTTTGTAGTCAAGTTAAAGCAGCAGATTTTGGGACAGCTATTGTTCAAGGTACAATGTCCTTTGTTTTTT  
TGTATATTGCTGGGTAAACAGTAAACACAGGTATTGTTACCCAGCAAATATCCTTGGAAATAACAAACAGACA  
GCATATAGACAATACACTTTTTAGGTACAACCTTATTTGAGCAACAAATAAGGCCTTCTACAAAGTCTAGTTAA  
TAGATTTTGTTCATGACAAAAGTTTGTACACAAGTCAGCACTTGGTGTGGGGGTTTTGCTAAGAACTCTAGTA  
TAAAAGGAGCCTCCACCATGGGTGAGTACTTGCCTAGGACTCCTGAACGAGTGCCGGGACAATTGGATCA  
TCGATTGGTTATCGGGAACCTGAAGGTCTTGCGCCAAAGGTTGTGGGGCTCCCCGATTGTGCTGAATTGTGCA  
GAACTGGCTATACTTGTAACTAATCATACTAAGATAAGTAAATCTATTTAATTCTATTATTACTTGTGTGTGT  
GTAAGTTATTGCTCACTAACAGTCTATCAGAAGGCTTAATCATTGATCCTGCATATTTATTAATATTTGTCAT  
TAATGTCAATTAATACAAATTAATTAATATTGATAAAGGTTAACCCCTTTATTACATTTGGCGTAGTCGGCAG  
GATTAACCCTTTTGTATGCTGGGAAGTGCAGTAATAACTTGTATAGAAATTGTAGAATTTATAGTGCAGCTTTG  
TATGGTAGTGTAGTGGCAGTATTGTAGTGGCTTGTGCAGGGCAAACATACTGTTGAAAGTTAGCAATAATGTT  
CTGTTGGTTGAAAAACAAAGTTAGAGGGGTAGATGATCAAACGAGCAACCTTCCCACATGGGCTAGTTCGGGA  
CCCTGGACCCATGTTGCTCGGGATGTGATAGGAGATCAGCAACTCTCTCAGGTGACTCACCCGATCACCTGT  
TGCTGAATTTGGATTTGTCTATGTGTTCCAAGGAGCAGAAGTCCCTCAGCACAATTTGGGTTGGTTGTGTTTTCA  
GGCGCTCAGGGAGGAGACAGTCCAAAGGGAGGCAGTTGAGTTTGTAGCTGCAGGCAGTTAAAGATCAACTAGCC  
ACAATGAGAGAATGTTTGCCTCCTCATTAGCACACAATGAGGAGTTGGAGATAGAATTTACAAAATATGTGG  
TAAGAACTATGAGTAAAAAGCACCATAGAAAAGAGACAGAACAAGCAGAAAATGGTGTATTAGTTAAAGTAAG

AACTCTTGTAAGTAAAAGAGACTAAGGGAGTGATTTATTTCTCAAGATAGAGAAACAAAATAAATGTTACATT  
GTGTTTAATTGACTGTATGTTAATGTCATATGTTTTCTGTTTCAGGATTTAAGAATCTGATTATTTTGAGTT  
AATATGGTTTTTAATAACAGGCATCAAGAGTTGATGGATCCATTATTTTTGACACTTTTTGTTTTGTTTTTT  
AAGTGCACAAATTTGTGCGTAAAGGCCTTAAGACATGTCTGTTTTTGTAAAAAAGTTTAAACAATGAAAC  
TTGAGAGTTTTTAACACTTTTTGTTGTATGTTTCTGAGAATGTGTGGGCCACATGCATGTTGTTATGGTTTG  
TCTTGTCTTAATTGTGACAATGACTTAAATGTGACAGTACTGAAAAATTCTTGACAAAAGTAATACAAAATTA  
AGAAAGTTGTTAAAGTTGACAAAACAGATCTTAAATGCTAAGAACTGATGTTGCCCTGATCTTTTTGTTTTATA  
GATGTTTATCAAGTGCATTAACAAATGGGTTAATAGCAAAAACAATTGACAGCAAAACAAGGATTTGGACATTGT  
TAATCTTCAATGGACATCAGTACAAAGTATTGAAGAACCCTGGAATTCAGTTGAATGGTGACTTGGAACTTAA  
ATGGACATTGGTTTTGGACTTTATAAATGAATACTTATGTTTTGTTCAATTGTTTCCACAGACTGAAATTAGC  
ATTGCATACACTATTGTACTAATGGTAATAGGAATGTTATGGCTTGTTACATGAACTGTAAAGTGCTAGTTAG  
TGGGTTTTTATAGCACAGGCAGCACAGCTGAACTGTATATCTCCTATGGTATATAATATTGTGCAGTGAACCTG  
CAGTATAGAGCAGGCCCTGGCTGACAATCTGTAGATTTAGGCAAATGCCAGAGGTGCTGCTGTAAGATGCCAT  
AGACAGTCACTATTTATTGGGCTGGTGGGGTCTGTTGGTCTCTGTGTATTTGAAATGCCAGGGTCTATTTT  
GAAATTAGTGTCAACAAAACCTTTTGATAAAAACAGAAAGAGTGAATTTATTATTCTGAGGGAGAAATTGTTA  
TGTGAAACTAACAATGTCTGTAGACAAGCATTATGGTATAATTGTTGTAAGTGTGAATAGGGTAATGTAATTT  
TATGAGTTAGTACTGTGATGTCAATGGGGTTGGCTGAAGGAGAGTTTAGACAACCTCTATATGATTGAAGTTAA  
AGACTACAACCTAATACACAATTCTGTTGAGGGACACAGTAGTTTACAAGAAGTCACTGTTAGACTTGATAGT  
ATCATCCCAAGTGATTTGAATGCCCTGGGTGATTTGTGGCCTTATGGGTGGAATTTGTGGCTACTGGTGATAG  
ACATATTTTGGAAAAGCATTGGCAGAATGTGTACTGAGGCTACAATCTGCTGAAAGGAATTCAGTTGCCATT  
TGGTATATAAAAAGGGGTTAGGTACAAACAAAGTGCATGGCAGATACATAATATAGTAAACATTTTGCTTATC  
AAAGAAGCACTGTTTAACTATGTGAGCTGTAAAGCCTGCAAGGTAACCTGCCCTTGGCCTAATGTTTTGAGC  
AGCTGATGGTCTATAATGAAAATGCAGAGCAAGAGGGATGCCATACATGTTTGGCCACATGTTTGGCCGAGAT  
ATATATCTACAAGTAGACACAGATTTTCTCACTGGACAGAAATCATTATAGAGGTGTTTTATGACTTGGGATG  
TAGGTGAGATGTGTTAATCTTTTGTTAAATGTAGTGTCCCTCAGTCAGAATTACAGTCATTAATTGTTTTATT  
TGTTTAGGGTAATGGGGACAACCAGTAAATGCATATATTGCATTGAATGCAGCATTGTATGTTATCTGTATTA  
GAGGACTTACCAATTTGTATACTGTTGGTTATTATTATCAAATCAGTATATTTTTGTAATCAAGGGGTGGAAT  
GTAGCACGGTGGATTTTATTTGATTTTATAATGATTTACAATATACATCTGCTTTGACATATGAATCAAATC  
TTAGGTTTGAGTCAAGTTAAAGCAGCAGATTTTGGGACAGCTATTGTTCAAGGTACAATGTCTTTGTTTTTT  
GTATATTGCTGGGTAAACAGTAAACACAGGTATTGTTACCCAGCAAATATCCTTGGAAATAAACAAACAGACAG  
CATATAGACAATACACTTTTTAGGTACAACCTTATTTGAGCAACAATAAGGCCTTCTACAAAGTCTAGTTAAT  
AGATTTTGTTCATGACAAAAGTTTGTACACAAGTCAGCACTTGGTGTGGGGGTTTTGCTAAGAACTCTAGTAT  
AAAAGGAGCCTCCACCATGGGTGAGTAGCTTCGCCTAGGACTCCTGAACGAGTGCCGGGACAATTGGATCAT  
CGATTGGTTATCGGGAACTGAAGGTCTTGCGCCAAAGGTTGTGGGGCTCCCCGATTGTGCTGAATTGTGCAG  
AACTGGCTATACTTGTAACTAATCATACTAAGATAAGTAAATCTATTTAATTCTATTATTACTTGTGTGTGTG  
TAAGTTATTGCTCACTAACAGTCTATCAGAAGGCTTAATCATTGATCCTGCATATTTATTAATATTTGTCATT  
AATGTCAATTAATACAAATTAATTAATATTGATAAAGGTTAACCCCTTTATTACA

>Xt-S11\_CM004447.2:28728451-28724434\_Xenopus tropicalis strain Nigerian  
chromosome 5, whole genome shotgun sequence  
TGTAGCACGGTGGATTTTATTTGATTTTATAATGATTTACAATATACATCTGCTTTGACATATGAATCAAAT  
CTTAGGTTTGAGTCAAGTTAAAGCAGCAGATTTTGGGACAGCTATTGTTCAAGGTACAATGTCTTTGTTTTTT  
TTGTATATTGCTGGGTAAACAGTAAACACAGGTATTGTTACCCAGCAAATATCCTTGGAAATAAACAAACAGAC  
AGCATATAGACAATACACTTTAGGTACAACCTTATTTGAGCAACAATAAGGCCTTCTACAAAGTCTAGTTAAT  
AGATTTTGTTCATGACAAAAGTTTGTACACAAGTCAGCACTTGGTGTGGGGGTTTTGCTAAGAACTCTAGTA  
TAAAAGGAGCCTCCACCATGGGTGAGTAGCTTCGCCTAGGACTCCTGAACGAGTGCCGGGACAATTGGATCA  
TCGCTTGGTTATCGGGAACTGAAGGTCTTGCGCCAAAGGTTGTGGGGCTCCCCGATTGTGCTGAATTGTGCAG  
AACTGGCTATACTTGTAACTAATCATACTAAGATAAGTAAATCTATTTAATTCTATTATTACTTGTGTGTGTG  
TAAGTTATTGCTCACTAACAGTCTATCAGAAGGCTTAATCATTGATCCTGCATATTTATTAATATTTGTCATT  
AATGTCAATTAATACAAATTAATTAATTAATAAAGGTTACCCCTTTATTACATTTGGCGTAGTCGGCAGG  
ATTAACCCTTTTGATGCTGGGAAGTGCAGTAATAACTTGTATAGAAATTGTAGAATTTATAGTGTAGCTTTGT  
ATGGTAGTGTAGTGGCAGTATTGTAGTGGCTTGTGCAGGGCAAACATACTGTTGAAAGTTAGCAATAATGTTT  
TGTTGGTTGAAAACAAAGTTAGAGGGGTAGATGATCAAACGAGCAACCTTCCACATGGGCTAGTTCCGGAC  
CCTGGACCCATGTTGCTCGGGATGTGATAGGAAATCAGCAACTCTCTCAGGTGACTCACCCCATCACCTGTT

GCTGAATTTGGATTTGTCTATGTGTACCAAGGAGCTGAAGTCCTCAGCACAATTGGGTTGGTTGTGTTTTTCAG  
GCGCTCAGGGAGGAGACAGTCCAAAGGGAGGCAGTTGAGCTTGAGCTGCAGGCAGTTAAAGATCAACTAGCCA  
CAATGAGAGAATGTTTTGCGCTCCTCATTAGCACACAATGAGGAGTTGGAGATAGAATTTGCAAAATATGTGGT  
AAGAACTATGAGTAAAAAGCACCATAGAAAAGGGACAGAACAAGCAGAAAATGGTGTATTAGTTAAAGTAAGA  
ACTCTTGTAAGTAAAAGAGACTAAGGGAGTGATTTATTTCTCAAGATGGAGAAAACAAAATAAATGTTACATTG  
TGTTAAATTTGACTGTATGTTAATGTCATATGTTTTTCTGTTTCAGGATTTAAGAATCTGATTATTTTTGAGTT  
AATATGGTTTTTTGATAACAGGCATCAAGAGTTGATGGATCCATTATTTTTGACACTTTTTGTTTTGTTTTTTA  
AGTGCACAAAATTTGTGCGTAAAGGCCTTAAGACATGTCTGTTTTTGTAAAAAAGTTTAACTATTAA  
CTTGAAAGTTTTTAACACTTTTTGTTGTATGTTTTTGAGAATGTGTGGGCCACATGCATGTTGTTATGGTTT  
GTCTTGTCTTAATTTGTGACAATGATTTAAATGTGACAGTGACTGAAAAATCCTTGACAAAATAATACAAAATT  
AAGAAAGTTGATAAAGTTGACAAAACAGATCTTAAATGCTAAGAAGTATGTTGCCTTGATCTTTTTGTTTTAT  
AGATGTTTTATCAAGTGCATTAACAAATGGGTTAATAGCAAAAACAATGGACAGCAAAACAAGGATTTGGACATTG  
TTATCTTCAATGGACATCAGTACAAAGTATTGAAGAACCCTGGAATTCATTTGAATGGTGACCTGGAAACTTAA  
ATGGACATTGGTTTTGGACTTTATAAATGAATACTTATGTTTTGTTCAACTGTTTCTACAGACTGAAATAAGC  
ATTGCATACACTATTGTACTAATGGTAATAGGAATGTTATGGCTTGTTACATGAACTGTAAAGTGCTAATAAG  
TGGGTTTTAGAGCACAGGCAGCACAGCTGAACTGTATATCTCCTATGGTATATAATATTGTGCAGTGAACCTG  
CAGTATAGAGCAGGCCCTGGCTGACAATCTAAAGATTTAGGCAATGCCAGAGGTGCTGCTGTAAGATGCCAT  
AGACAGTCACTATTTATTGGGCTGGTGGGGTCTGTTGGTCTCTGTGTATTTGAAATGCCAGGGTCTATTTT  
GAAATTAGTGTCAACAAAACCTTTTGATAAAAACAGAAAGAGTGAATTTATTATTCTGAGGGAGAAATTGTTA  
TGTGAAACTAACAATGTCTGTAGACAAGCATTATGGTATAATTGTTGTAAGTGTGAATAGGGTAATGTAATTT  
TATGAGTTAGTACTATGATATCAATGGAGTTAGCTGAATGTTGGCTGTAAGAGAGTTTGGACAACCTCTATATG  
ATTGAAGTGAAGCCTTTTAAAGACTACAAGTTAATACACAATCTCTGCTGAGGGACACGTTAGTTTACAAGAA  
GTCACTGTTAGACTTGATAGTATCATCCAAGTGATTTGAATGCCCTGGGTGATTTGTGGCCTTATGGGTGGA  
ATTTGTGGCTACTGGTGATAGACATATTTTGGAAAAGCATTGGCAGAATGTGTACTGAGGCTACAATCTGCT  
GAAAGGAATTCAGTTGCCATTTGGTATATAAAAAGGGGGTTAGGTACAAACAAAAGTGCATGGCAGATACATAAT  
ATAGTAAACATTTTGCTTATCAAAGAAGCACTGTTTAACTATGTGAGCTGTAAAGCCTGCAAGGTAACCTGCC  
CTTGGCCTAATTTGTTTTGAGCAGCTGATGGTCTATAATGAAAATGCAGAGCAAGAGGGATTCTTATACATGTT  
TGCCACATGTTTGCCCAAGATATGTATCTACAAGTAGACACAGATTTTCTCACTGGACAGAAATCATTATAAAA  
GGTGTTTTTATGACTTGGGATGTAGGTGAGATTTGTTTAAATCTTTTGTTAAATGTAGTGTCCCTCAGTCAGAAT  
TACAGTCATTAATTTGTTTATTTGTTTAGGGTAATGACAACCAGTAAATGCATATATTGCATTGAATGCAGCAT  
TTTATGTTATCTGTATTAGAGGACTTACCAATTTGTATACTGTTGGTTATTATTATCAAATCAGTATATTTTG  
TAAATCAAGGGGTGGAATGTAGCACGGTGGATTTTATTTTGATTTTATAATGATTTACAATATATATACATCT  
GCTTTGACATATGAATCAAATCTTAGGTTTGTAGTCAAGTTAAAGCAGCAGATTTTGGGACAGCTATTGTTCAA  
GGTACAATGTCTTTGTTTTTTTTGTATATTGCTGGGTAAACAGTAAACACAGGTATTGTTACCCAGCAAATAT  
CCTTGGAATAAAACAAACAGACAGCATATAGACAATACACTTTAGGTACAACCTTATTTGAGCAACAAATAAGGC  
CTTCTACAAAGTCTAGTTAATAGATTTTGTTCATGACAAAAGTTTGTACACAAGTCAGCACTTGGTGTGGGG  
GTTTTGCTAAGAAGTCTAGTATAAAAAGGAGCCTCCACCATGGGTGAGTACTTCCGCTAGGACTCCTGAACG  
AGTGCCGGGACAATTTGGATCATCGCTTGGTTATCGGGAACCTGAAGGTCTTGCGCCAAGGTTGTGGGGCTCCC  
CGATTGTGCTGAATTTGTGCAGAACTGGCTATACTTGTAACTAATCATACTAAGATAAGTAAATCTATTTAATT  
CTATTATTACTTGTGTGTGTGTAAGTTATTGCTCACTAACAGTCTATCAGAAGGCTTAATCATTGATCCTGCA  
TATTTATTAATATTTGTCATTAATGTCAATTAATACAAATTTATTAATATTAATAAAGGTTACCCCTTTATT  
ACA

>Xt-s12\_CM004445.2:51361566-51357539\_Xenopus tropicalis strain Nigerian  
chromosome 3, whole genome shotgun sequence  
TGTAGCACAGTGGATTTTATTTGATTTTATAATGATTTACAATATACATCTGCTTTGACATATGAATCAAAT  
CTTAGGTTTGTAGTCAAGTTAAAGCAGCAGATTTTGGGACATCTATTGTCCAGTGTCAAGGTACAATGTCTTT  
GTTTTTTGAATATTGCTGGGTAAACAGTAAACACAGGTATTGTTACCCAGCAAATATCCTTGGAATAAAACAA  
CAGACAGCATATAGACAATACACTTTAGGTACAACCTTATTTGAGCAACAAATAAGGCCTTCTACAAAGTCTAG  
TTAATAGATTTTGTTCATGACAAAAGTTTGTACACAAGTCAGCACTTGGTGTGGGGGTTTTGCTAAGAAGTCT  
TAGTATAAAAAGGAGCCTCCACCATGGGTGAGTACTTCCGCTAGGACTCCTGAAAGAGTGCCGGGACAATTTG  
GATCATCGCTTGGTTATCGGGAACCTGAAGGTCTTGCGCCAAGGTTGTGGGGCTCCCCGATTGTGCTGAATT  
GTGCAGAACTGGCTATACTTGTAACTAATCATACTAAGATAAGTAAATCTATTTAATTCTATTATTACTTGTG  
TGTGTGTAAGTTATTGCTCACTAACAGTCTATCAGAAGGTTAATCATTGATCCTGCATATTTATTAATATTT

GTCATTAATGTCAATTAATAACAAATTATTAATATTAATAAAGGTTACCCCCCTTTATTACATTTGGCGTAGTC  
GGCAGGATTAACCTTTTTGATGCTGGGAAGTGCAGTAATAATTTGTATAGAAATTGTAGAATTTATAGTGTAG  
CTTTGTATGGTAGTGTAGTGGCAGTATTGTAGTGGCTTGTGCAGGGCAAACATACTGTTGAAAGTTAGCAATA  
ATGTTCTGTTGGTTGAAAAACAAAATTAGAGGGGTAGATGATCAAACGAGCAACCTTCCACATGGGCTAGTT  
CCGGACCCTGGACCCATGTTGCTCGGGATGTGATAGGAGATCAGCAACTCTCTCAGGTGACTCACCCCATCA  
CCTGTTGCTGAATTTGGATTTGTCTATGTGTTCCAAGGAGCTGAAGTCTCAGCACAATTGGGTTGGTTGTGT  
TTTCAGGGCGCTCAGGGAGGAGACAGTCCAAAGGGAGGCAGTTGAGCTTGAGCTGCAGGCAGTTAAAGATCAAC  
TAGCCACAATGAGAGAATGTTTGCCTCCTCATTAGCACACAATGAGGAGTTGGAGATAGAATTTACAAAATA  
TGTGGTAAGAACTATGAGTAAAAGCACCATAGAAAAGGGACAGAACAAGCAGAAAATGGTGTATTAGTTAA  
GTAAGAACTCTTGTAAGTAAAAGAGACTAAGGGAGTGATTTATTTCTCAAGATAGAGAAAACAAAATAAATGTT  
ACATTGTGTTAAATTTGACTGTATGTTAATGTCATATGTTTTTCTGTTTCAGGATTTAAGAATCTGATTATTT  
TGAGTTAATATGGTTTTTGTAAACAGGCATCAAGAGTTGATGGATCCATTATTTTTGACACTTTTTGTTTTGT  
TTTTTAAGTGCACAAAATTTGTGCGTAAAGGCCCTTAAGACATGTCTGTTTTTGTAAAAAAAAGTTTTACAATG  
AACTTGAAAGTTTTAAACACTTTTTGTTGTATGTTTCTGAGAATGTGTGGGCCACATGCATGTTGTTATGG  
TTTGTCTTGTCTTAATTGTGACAATGACTTAAATGTGACAGTGAAGTGAAGTGAAGTGAAGTGAAGTGAAGT  
ATTAAGAAAGTTGATAAAGTTGACAAAACAGATCTTAAATGCTAAGAAGTGAAGTGAAGTGAAGTGAAGTGAAGT  
TATAGATGTTTATCAAGTGCATTAACAAATGGGTTAATAGCAAACAATGGACAGCAAACAAGGATTTGGACA  
TTGTTATCTTCAATGGACATCAGTACAAAGTATTGAAGAACCCTGGAATTCATTTGAATGGTGACCTGGAACT  
TAAATGGACATTTGGTTTTGGACTTTATAAATGAATACTTATGTTTTGTTCAACTGTTTCTACAGACTGAAATT  
AGCATTGCATACACTATTGTACTAATGGTAATAGGAATATTATGGCTTGTAAATGAAGTGAAGTGAAGTGAAGT  
TAGTGGGTTTTATAGCACAGGCAGCACAGCTGAAGTGTATATCTCCTATGGTATATGATATTGTGCAGTGAAC  
CTGCAGTATAGAGCAGGCCCTGGCTGACAATCTGTAGATTGAGCAAATGCCAGAGGGGCTGCTGTAAGATGC  
CATAGACAGTCACTATTTATTTGGGCTGGTGGGGTCTGTTTGGGTCTCTGTGATTTGAAATGCCAGGGTCTAT  
TTTGAAATTAGTGTCAACAAAACCTTTTGATAAAAACAGAAAGAGTGAAGTGAAGTGAAGTGAAGTGAAGTGAAGT  
TTATGTGAAACTTAAACAATGTCTGTAGACAAGCATTATGGTATAATTGTTGTAAGTGTGAATAGGGTAATGTA  
ATTTTATGAGTTAGTACTATGATATCAATGGAGTTAGCTGAATGTTGGCTGTAAGAGAGTTTGGACAACGCTA  
TATGATTGAAGTGAAGGCCCTTTTAAAGACTACAAGTAAATACACAATTCTGCTGAGGGACACAGTTGTTTTACA  
AGAAGTCACTGTTAGACTTGATAGTATCATCCCAAGTGATTTGAATGCCCTGGGTGATTTGTGGCCTTATGGG  
TGGAATTTGTGGCTACTGGTGATAGACATATTTTGGAAAAGCATTGGCAGAATGTGTACTGAGGCTAAAACCTC  
TGCTGAAAGGAATTCAGTTGCCATTTGGTCTATAAGAGGGGGTAAGGTAGAAAACAAAGTGCATGGCAGATAC  
ATAATATAGTAAACATATTGCTTATCAAAGAAGCATTGTTTAACTATGTGAGCTGTAAAGCCTGCAAGGTAAC  
CTGCCCTTGGCCTAATTTGTTTTGAGCAGCTGATGGTCTATAATGAAAATGCAGAGCAAGAGGGGTGCCTATAC  
ATGTTTGCCTCATGTTTGGCCAAAGATATGTATCTATAAGTAGACACAGATTTTCTCACTGGACAGAAATCATT  
ATAGAGGTGTTTTATGACTTGGGATGTAGGTGAGATTTGTTTAACTTTTTGTTAAATCTAGTGTCTTTCAGTC  
AGAATTACAGTCATTAATTTGTTTATTTGTTTGGGTAATGGGGACAACCAGTGAATGCATATATTGCATTGAA  
TGCAGCATTGTATGTTATCTGTATTAGAGGACTTACCAATTTGTATACTGTTGGTTATTATTATCAAATCAGT  
ATATTTTGTAAATCAAGGGGTGGAATGTAGCACAGTGGATTTTATTTTGAATTTTATAATGATTTACAATATAC  
ATCTGCTTTGACATATGAATCAAATCTTAGGTTTGGAGTCAAGTTAAAGCAGCAGATTTTGGGACATCTATTGT  
CCAGTGTTCAGGTACAATGTCTTTGTTTTTTGAATATTGCTGGGTAAACAGTAAACACAGGTATTGTTACCC  
AGCAAATATCCTTGGAAATAACAAACAGACAGCATATAGACAATACACTTTAGGTACAACCTTATTGAGCAAC  
AAATAAGGCCTTCTACAAAAGTCTAGTTAATAGATTTTGTTCATGACAAAAGTTTGTACACAAGTCAGCACTTG  
GTGTTGGGGGTTTTGCTAAGAAGTCTAGTATAAAAAGGAGCCTCCACCATGGGTGAGTACTTCCGCTAGGAC  
TCCTGAAAGAGTGCCGGGACAATTGGATCATCGCTTGGTTATCGGGAACCTGAAGGTCTTGCGCCAAAGGTTG  
TGGGGCTCCCCGATTGTGCTGAATTGTGCAGAACTGGCTATACTTGTAACTAATCATACTAAGATAAGTAAAT  
CTATTTAATTCTATTATTAATTTGTTGTTGTTGTTGTTGTTGTTGTTGTTGTTGTTGTTGTTGTTGTTGTTGTT  
TGATCCTGCATATTTATTAATATTTGTCATTAATGTCAATTAATAACAAATTATTAATATTAATAAAGGTTAC  
CCCCTTTATTACA

>Xt-s13\_CM004444.2:89086660-89090623\_ Xenopus tropicalis strain Nigerian  
chromosome 2, whole genome shotgun sequence  
TGTAGCACGGTGGATTTTCTATTGATTTTATGATTTACAATATATACATCTGCTTTGACATATGAATCAAATC  
TTAGGTTTGGAGTCAAGTAAAAGCAGCAGATTTTGGGACAGCTATTGTCTAGTGTTCAGGTACAATGTTTTTG  
TTCTATGTATATTGCTGGGTAAACAGTAAACACAGGTATTGTTACCCAGCAAATATCCTTGGAAATAACAAAC  
AGACAGCATATAGACAATACACTTTAGGTACAACCTTATTGAGCAACAATAAGGCCCTTCTACAAAGTCTAGT

TAATAGATTTTGTTCATGACAAAAGTTTGTACACAAGTCAGCACTTGGTGTGGGGGTTTTGCTAAGAACTCT  
AGTATAAAAAGGAGCCTCCACCATGGGTCAGTAGCTTCGCCTAGGACTCCTGAACGAGTGCCGGGACAATTGG  
ATCATCGCTTGGTTATCGGGAACCTGAAGGTCTTGCGCCAAAGGTTGTGGGGCTCCCCGATTGTGCTGAATTG  
TGCAGAACTGGCTATACTTGTAACTAATCATACTAAGATAAGTAAATCTCTTTGATTCTATTATTACTTGTGT  
GTGTGTAAGTTATTGCTCACTAACAGTCTATCAGAAGGTTAATCATTGATCCTGCATATTTATTAATATTTG  
TCATTAATGTCAATTAATACAAATTATTAATATTAATAAAGGTTACCCCCCTTTATTACATTTGGCGTAGTCG  
GCAGGATTAACCCTTTTGTATGCTGGGAAGTGCAGTAATAACTTGTATAGAAATTGTAGAATTTATAGTGCAGC  
TTTGTATGGTAGTGTAGTGGCAGTATTGTAGTGGCTTGTGCAGGGCAAACATACTGTTGAAAGTTAGCAATAA  
TGTTCTGTTGGTTGAAAAACAAAGTTAGAGGGGTAGATGATCAAACGAGCAACCTTCCCACATGGGCTAGTTC  
CGGACCCTGGACCCATGTTGCTCGGGATGTGATAGGAAATCAGCAACTCTCTCAGGTGACTCACCCCATCAC  
CTGTTGCTGAATTTGGATTGTCTATGTGTTCCAAGGAGCTGAAGTCTCAGCACAATTTGGGTTGGTTGTGTT  
TTCAGGCGCTCAGGGAGGAGACAGTCCAAAGGGAGGCAGTTGAGCTTGAGCTGCAGGCAGTTAAAGATCAACT  
AGCCACAATGAGAGAATGTTTGCCTCCTCATTAGCACACAATGAGGAGTTGGAGATAGAATTTGCAAAATAT  
GTGGTAAGAACTATGAGTAAAAAGCACCATAGAAAAGGGACAGAACAAGCAGAAAATGGTGTATTAGTTAAAG  
TAAGAACTCTTGTAAAGTAAAAGAGACTAAGGGAGTGATTTATTTCTCAAGATGGAGAAAACAAAATAAATGTTA  
CATTGTGTTAAATTGACTGTATGTTAATGTCAATATGTTTCTGTTTCAGGATTTAAGAATCTGATTATTTT  
GAGTTAATATGGTTTTTGTATAACAGGCATCAAGAGTTGATGGATCCATTATTTTTGACACTTTTTGTTTTGTT  
TTTTAAGTGCACAAATTTGTGCGTAAAGGCCTTAAGACATGTCTGTTTTTGTAAAAAATAAATGTAACATA  
TTAACTTGAAGTTTTTAAACACTTTTTGTTGTATGTTTTGAGAATGTGTGGGCCACATGCATGTTGTTAT  
GGTTTGTCTTGTCTTAATTGTGACAATGACTTAAATGTGACAGTGAAGTAAATTTCTGACAAAGTAATACA  
AAATTAAGAAAGTTGTTAAAGTTGACAAAACAGATCTTAAATGCTAAGAACTGATGTTGCCTTGATCTTTTGT  
TTTATAGATGTTTATCAAGTGCATTAACAAATGAGTTAATAGCAAAACAATTGACAGCAACAAGGATTTGGA  
CATTGTTAATTTTGAATGGACATCAGTAACAAAGTCAACAAACGAAGTATTGAAGAACATGGAATTCATTTGA  
ATGGTGACCTGGAAACTTAAATGGACATTGGTTTTGGACTTTATAAATTAATACTTATGTTTTGTTCAACTGT  
TTCTACAGGCTGAAATTAGCATTGCATACATTATTGACTAATGGTAATAGGAATGTAATGGCTTGTTACATG  
AACTGTAAAGTGTAGTTAGTGGGTTTTATAGCACAGGCAGCACAGCTGAACTGTATACTCCTATGGTATAT  
AATATTGTGCAGTGAACCTGCAGTATAGAGCAAGCCACTGGCAATCTGTGAATTTAGGTAAATGCCAGAGGGG  
CTGCTGTAAGATACCACAGACACTCACTATTTATTGGCCGGGTGGGGGCTGTTTGGGGCTCTGTGTACTTGAA  
ATATCAGGGCCTATTTTGTATAAACAGAAAGAGTGAAATTTATTATTCTGAGGGAGAAAATTATTATGTGAAAC  
TGACAATGTCTGTAGACAAGTATTATGGTATAAGTAATTTATTGTAAGTGTGAATACGGTAATGTTATTTTGTG  
AGTTAGTACTGTGATGTCAATGGGGTTGGCTGAAGGAGAGTATAGACAACCTCTATATGATTGAAGTTAAAGAC  
TACAACCTAATATACAATCTGTTGAGGGACACAGTAGTTTATAAGAAGTCACTGTTAGACTTGATAGTATCA  
TCCAAGTGAATTTGAATGCCCTGTGTGATTTGTGGCCTTATGGGTGGAATTTGTGGCTACTGGTGATAGACAT  
ATTTTGGAAAAGCATTGGCAGAATGTGTACTGAGGCTAAAACCTGCTGAAAGGAATTCAGTTGCCATTTGGT  
CTATAAGAGGGGGGTTAGGTAGAAAACAAAGTGCATGGCAGATACATAATATAGTAAACATATTGCTTATCAAA  
GAAGCACTGTTAACTATGTGAGCTGTAAAGCCTGCAATGAAACCTGCCCTTGGCCTAATTTGTTTTGAGCAGC  
TGATAGTCTGTAATGAAAATGCAGAGCAAGAGGGATTCTATACATGTTTGCCACATGATTGCCCATGATATG  
TATCTACAAGTAGACACAGATTTTCTCACTGGACAGAAAATCATTATAGAGATGTTTTATGACTTGGGATGTAG  
GTGAGATTTGTTTAACTTTTTGTTAAATGTAGTGTCCCTCAGTCAGAATTACAGTCATTAATTGTTTATTTGT  
TTAGGGTAATGGGGACAACCAGTGAATGCATATATTGCATGAAATGCAGCATTGTATGTTATCTGTATTATTA  
TCAAATCAGTATATTTTGTAAATCAAGGGGTGGAATGTAGCACGGTGGATTTTCTATTGATTTTATGATTTAC  
AATATATACATCTGCTTTGACATATGAATCAAATCTTAGGTTTGTAGTCAAGTAAAAGCAGCAGATTTTGGGAC  
AGCTATTGTCTAGTGTCAAGGTACAATGTTTTTGTCTATGTATATTGCTGGGTAAACAGTAAACACAGGTA  
TTGTTACCCAGCAAAATATCCTTGGAAATAACAAACAGACAGCATATAGACAATACACTTTAGGTACAACCTTAT  
TTGAGCAACAAATAAGGCCCTTCTACAAAGTCTAGTAAATAGATTTTGTTCATGACAAAAGTTTGTACACAAGT  
CAGCACTTGGTGTGGGGGTTTTGCTAAGAACTCTAGTATAAAAAGGAGCCTCCACCATGGGTCAGTAGCTTC  
GCCTAGGACTCCTGAACGAGTGCCGGGACAATTGGATCATCGCTTGGTTATCGGGAACCTGAAGGTCTTGCGC  
CAAAGGTTGTGGGGCTCCCCGATTGTGCTGAATTGTGCAGAAGTGGCTATACTTGTAACTAATCATACTAAGA  
TAAGTAAATCTCTTTGATTCTATTATTACTTGTGTGTGTGTAAGTTATTGCTCACTAACAGTCTATCAGAAGG  
TTTAAATCATTGATCCTGCATATTTATTAATATTTGTCATTAATGTCAATTAATACAAATTTATTAATATTAATA  
AAGGTTACCCCCCTTTATTACA

>Xt-s14\_CM004452.2:20863848-20859955\_Xenopus tropicalis strain Nigerian chromosome 10, whole genome shotgun sequence

TGTAGCACGGTGGATTTTATTTTGGATTTTATAATGATTTACAATATACATCTGCTTTGACATATGAATCAAAT  
CTTAGGTTTTGAGTCAAGTAAAAGCAGCAGATTTTGGGACAGCTATTGTCCAGTGTTCAAGGTATATTGCTGGG  
TAAACAGTAAACACAGGTATTGTTACCCAGCAAATATCCTTGAATAAAACAAACAGACAGCATATAGACAATA  
CACTTTATGTACAACCTATTTGAGCAACAAATAAGGCCTTCTACAAAGTCTAGTTAATAGGTTTTGTTTCATGA  
CAAAAGTTTTGTACACAAGTCAGCACTTGGTGTGGGGGTTTTGCTAAGAAGTCTAGTATAAAAGGGAGCCTCC  
ACCATGGGTCTAGTCTTCGCCTAGGACTCCTGAACGAGTGCCGGGACATTTGGATCATCGCTTGGTTATCGG  
GAACCTGAAGGTCTTGCGCCAAAGGTTGTGGGGCTCCCAATTGTGCTGAATTGTGCAGAACTGGCTACACTT  
GTAACATAATCATAACCAAGATAAGTAAATCTATTTGATTTCTATTATTACTTGTGTGTTATTGCTCACTAACA  
GTTTATCAGAAGGCTTAATCATTGATCCTGCATATTTATTAATATTTGTCATTAATGTCAATTAATTATTAAT  
ATTAATAAAGGTTACCCCCCTTTATTACATTTGGCGTAGTCGGCAGGATTAACCCCTTTGATGCTGGGAAGTG  
CTGTAATAAATTGTATAGAAAATTGTAGAATTTATAGTGCAGCTTTGTATGGTAGCGTAGTGGCAGTATTGTAG  
TGGCTTGTGCAGGGCAAACATACTGTTGAAAGTTAGCAATAATGTTCTGTTGGTTGAAAAACAAAGTTAGAGG  
GATAGATGATCAAACGAGCAACCTTCCCACATGGGCTAGTTCGGGACCCTGGACCCATGTTGCTCGGGATGTG  
ATAGGAGATCAGCAACTCTCTCAGGTGACTCACCCCGATCACCTGTTGCTGAATTTGGATTTGCTCTATGTGTT  
CCAAGGAGCAGAAGTCTCAGCACAATTGGGTTGGTTGTGTTTTTCAGGCGCTCAGGGAGGAGACAGTCCAAG  
GGAGGCAGTTGAGCTTGGAGATAGAATTTACAAAATATGTGAGCAGAAAATGGTGTATTAGTTAAAGTA  
TGGAGTCTTGTAAAGTAAAAGAGACTAAGGGAGTGATTTATTTCTCAAGATAGAGAAAACAAAATAAATGTTACA  
TTTTGTTTTAATTGTACTGTATGCTAATGTATATGTTTTTCTGTTTCAGGATCTAAGAATCTGATTATTTTGA  
GTTAATATGGTTTTTAATTACAGACATCAAGAGTTGAAGGATCCATTATTCTTGACAAAATTTTTGTTCTGTTT  
TTAGTGCACAGATTTCTGTGTAAAGGCCTTAAGACATGTCTGTTTTTGTAAAAGAAAGTTTAAACAATGAAAC  
TTGAAAGTTTTTAAACTTTTTGTTGTATGTTTCTGAGAATGTGTGGGCCACATGCATGTTGTTATGGTTTTG  
TCTTGTCTTAATTGTGACAATGACTTAAATGTGACAGTGACTGAAAAATTCTTGACAAAGTAATACAAAATTA  
AGAAAGTTGTTAAAAGTTGACAAAACAGATCTTAAATGCTAAGAAGTATGTTGCCCTGATCTTTTGTTTTTA  
TAGATGTTTTATCAAGTGCATTAATAAATGGGTTAATAGCAAAACAATTGACAGCAAAACAAGGATTTGGACATT  
GTTAATCTTGAATGGACATCAGTACAAAGTATTGAAGAACCCTGGAATTCAGTTGAATGGTGACTTGGAAACTT  
AAATGGACATTGGTTTTTGGACTTTATAAATGAATACTTATGTTTTTGTCAACTGCTTCTACAGACTGAAATTA  
GCATTGCATACACTATTGTACTAATGGTAATAGGAATGTTATGGCTTGTACATGAACTGTAAAGTGTAGTT  
AGTGGGTTTTTATAGCACAGGCAGCACAGCTGAACTGTATATCTCCTATGGTATATAATATTGTGCAGTGAACC  
TACAGTGTAGAGCAGGCCCTGGCTGACAATCTGTAGATTCAGGCAAATGCCAGAGGTGCTGATGTAAGATGCC  
ATAGACAGTCACTATTTATTGGGCTGGGGGGGGGCTGTTTGGGTCTCTGTGATTTGAAATGCCAGGGCCTAT  
TTTGAATTAGTGTCAACGAAACTCTTTGATAAAAACAGAAAGAGTGAGGGAGAAAATGTTATGTGAAACTAAC  
AATGTCTGTAGACAAGTATTATGGTATAAGTAATTATTGTAAGTGTGAATAGGGTAATGTTATTTTGTGAGTT  
AGTACTGTGATGTCAATGGGGTTGGCTGAAGGAGAGTTTAGACAACCTATATGATTGAAGTTAAAGACTACA  
ACTTAATATACAATTTCTGTTGAGGGACACAATAGTTTATAAGAAGTCACTGTTAGACTTGATAGTATCATCCC  
AAGTGATTTGAATGCCCTGGGTGATTTGTGGCCTTATGGGTGGAATTTGTGGTTACTGGTGATAGACATATTT  
TGGAAAAGCATTGGCAGAAATGTGTATTGAGACTAAAATTCGCTGAAATGAATTCAGTTGCCATTTGGTCTAT  
AAGAGGGAGGTAAGGTAGAAAACAAAGTGCATGGCAGATACATAATATAGTAAACATATTGCTTATCAAAGAAG  
CACTGTTTTAACTATGTGAGCTGTAAAGCCTGCAATGAAACCTGCCCTTGGCCTAATTGTTTTGAGCAGCTGAT  
AGCCTATAATGAAAATGCAGAGCAAGAGGGGTGCCTATACATGTTTGCCACATGATTGCCCAAGATATGTATC  
TACAAGTGGACACAGATTTTCTCACTGGACAGAAAATCATATAGAGGTGTTTTATGACTTGGGATGTAGGTG  
AGATTTGTTTTAATCTTTTGTAAATGTAGTGTCTTCAGTCAGAATTTTCAGTCATTAATGTTTTATTTGTTTA  
GGGTAATGACAACCAGTAAATGCATATATTGCATTGAATGCAGCATTTTATGTTATCTGTATTAGAGGACTTA  
CCAGTTTGTATACTGTTGGTTATTATTATCAAATCAGTATATTTTGTAAATCAAGGGGTGGAATGTAGCACGG  
TGGATTTTATTTTGAATTTTATAATGATTTACAATATACATCTGCTTTGACATATGAATCAAATCTTAGGTTTG  
AGTCAAGTAAAAGCAGCAGATTTTGGGACAGCTATTGTGCAGTGTTCAAGGTTTATTGCTGGGTAACAGTAA  
ACACAGGTATTGTTACCCAGCAAATATCCTTGAATAAAACAAACAGACAGCATATAGACAATACTTTTATGT  
ACAACCTATTTGAGCAACAAAATAAGGCCTTCTACAAAGTCTAGTTAATAGGTTTTGTTTCATGACAAAAGTTTG  
TACACAAGTCAGCACTTGGTGTGGGGGTTTTGCTAAGAAGTCTAGTATAAAAGGGAGCCTCCACCATGGGTC  
AGTAGCTTCGCCTAGGACTCCTGAACGAGTGCCGGGACATTTGGATCATCGCTTGGTTATCGGGAACCTGAAG  
GTCTTGCGCCAAAGGTTGTGGGGCTCTCCAATTGTGCTGAATTGTGCAGAACTGGCTACACTTGTAACTATAA  
TCATAACCAAGATAAGTAAATCTATTTGATTCTATTATTACTTGTGTGTTATTGCTCACTAACAGTTTATCAGA  
AGGCTTAATCATTGATCCTGCATATTTATTAATATTTGTCATTAATGTCAATTAATACAAAATTTATTAATATTA  
ATAAAGGTTACCCCCCTTATTACA



>Xt-s15\_CM004451.2:15854700-15850673\_Xenopus tropicalis strain Nigerian chromosome 9, whole genome shotgun sequence

TGTAGCACGGTGGATTTTCTATTGATTTTATGATTTACAATATATATACATCTGCTTTGACATATGAATCAAA  
TCTTAGGTTTGGAGTCAAGTAAAAGCAGCAGATTTTGGGACAGCTATTGTCTAGTGTTC AAGGTATAATGTCTT  
TGTTCTATGTATATTGCTGGGTAAACAGTAAACACAGGTATTGTTACCCAGCAAATATCCTTGG AATAAACAA  
ACAGACAGCATATAGACAATACTTTATGTACAAC TATTTGAGCAACAAATAAGGCCTTCTAAGTCTAGTT  
AATAGGTTTTGTTTCATGACAAAAGTTTGTACACAAGTCAGCACTTGGTGTGGGGGTTTGCTAAGA ACTCTAC  
TATAAAAAGGAGCCTCCACCATGGGTCGGTAGCTTCGCCTAGGACTCCTGAACGAGTGCCGGGACATTTGGAT  
CATCGCTTGGTTATCGGGAACCTGAAGGTCTTGCGCCAAAGTTGTGGGGCTCCCCGATTGTGCTGAATTGTG  
CAGA ACTGGCTATACTTGTAACTAATCATACTAAGATAAGTAAATCTATTTGATTCTATTATTACTTGTGTGT  
GTGTAAGTTATTGCTCACTAAAAGTCTATCAGAAGGTTTAAATCATTGATCCTGCATATTTATTAATATTTGTC  
ATTAATGTCAATTAATACAAAATTATTAATATTAATAAAGGTTACCCCTTTTTTACATTTGGCGTAGTTGGC  
AGGATTAACCTTTTTGATGCTGGGAAGTGCAGTAATAACTTGTATAGAAATTGTAGAATTTATAGTGCAGCTT  
TGTATGGTAGTGTAGTGGCAGTATTGTAGTGGCTTGTGCAGGGCAAACATACTGTTGAAAGTTAGCAATAATG  
TTCTGTTGGTTGAAAAACAAAATTAGAGGGGTAGATGATCAAACGAGCAACCTTCCCACATGGGCTAGTTCCG  
GACCCTGGACCCATGTTGCTCGGGATGTGATAGGAGATCAGCAACTCTCTCAGGTGACTCACCCCATCACCT  
GTTGCTGAATTTGGATTTGCTCTATGTGTTCCAAGGAGCTGAAGTCCTCAGCACAATTGGGTTGGTTGTGTTTT  
CAGGCGCTCAGGGAGGAGACAGTCCAAAGGGAGGCAGTTGAGCTTGAGCTGCAGGCAGTTAAAGATCAACTAG  
CCACAATGAGAGAATGTTTGTCTCCTCATTAGCACACAATGAGGAGTTGGAGATAGAATTTACAAAATATGT  
GGTAAGA ACTATGAGTAAAAGCACCATAGAAAAGGGACAGAACAAGCAGAAAATGGTGCATTAGTTAGAATA  
AGA ACTCTTGTAAGTAAAAGAGACTAAGGGAGTGATTTATTTCTCAAGATAGAGAAAACAAAATAAATGTTACA  
TTGTGTTAAATTGACTGTATGTTAATGTCATATGTTTTTCTGTTTCAGGATTTAAGAACTGATTATTTTGA  
GTTAATATGGTTTTTTGATAACAGGCATCAAGAGTTGATGGATCCATTATTTTTTGACACTTTTTGTTTTGTTTT  
TTAAGTGCACAAATTTGTGCGTAAAGGCCTTAAGACATGTCTGTTTTTGTAAAAAAAAGTTTAAACAATGAAA  
CTTGAAAGTTTTTAACTTTTTGTTGTATGTTTTCTGAGAATGTGTGGGCCACATGCATGTTGTTGGTTTTGT  
CTTGTCTTAATTGTGACAATGACTTAAATGTGACAGTGACTGAAAAATCTTGACAAAAGTAATACAAAATTA  
GAAAGTTGATAAAGTTGACAAAACAGATCTTAAATGCTAAGA ACTGATGTTGCCTTGATCTTTTTGTTTTATAG  
ATGTTTATCATGGATATAACAAGTGCATTAACAAATGGGTTAATAGCAAAAACAATTGACAGCAAAACAAGGATT  
TGGACATTGTTAATCTTGAAATGGACATCAGTACAAAAGTATTGAAGA ACTGGAATTCATTTGAATGGTGACCT  
GGAACTTAAATGGACATTTGTTTTGGACTTTATAAATGAATACTTATGTTTTGTTCAACTGTTTCTACAGAC  
TGAAATTAGCATTGCATACACTATTGTACAAAAGGTAATAGGAATGTTATGGCTTGTTCATTCACTGTAAAG  
TGCTAGTTAGTGGGTTTTATAGCACAGGCAGCACAGCTGAACTGTATATCTCCTATGGTATATAATATTGTGC  
AGTGAACCTGCAGTATAGAGCAGGCCCTGGCTGACAATCTGTAGATT CAGGCAAATGCCAGAGGGGCTGCTGT  
AAGGTGCCATAGACAGTCACTATCTATTGGGCTGGTGGGGGCTGTTTGGGTCTCTGTATTTGAAATGCCAGGG  
TCTATTTTGA AATTTGGTGTCAACGAACTCTTTGATAAAAACAGAAAGAGTGA AATATATTTCTGAGGGAGA  
AATTGTTATGTGAAACTAACAATGTCTGTAGACAAGCATTATGGTATAATTGTTGTAAGTGTGAATAGAGTAA  
TGTAATTTTATGAGTTAGTACTATGATATCAATGGAATTAGCTGAATGTTGGCTGTAAGAGAGTTTGGACAAC  
TCTATATGATTGAAGCAAAAAGCCTTTTAAAGACTACAAGTTAATACACAATTCTGCTGAGGGACACAGTTGTT  
TATAAGAAGTCACTATTAGACTTGATAGTATCATCCCAAGTGATTTGAATGCCCTGGGTGATTTGTGGCCTTA  
TGGGTGGAATTTGTGGATACTAGTGATAGACTGATATTTTGGAAAAGCATCGTCAGAAATGTGTATTGAGGTTA  
AACTCTGCTGAAAGGAATTCAGTTGTCATTTGGTCTATAAGAAGGGGTAAGAAAACAAAGTGCATGGCAGAT  
ACATAATATAGTAAACATATGCTTATCAAAGAAGCACTGTTTAACTATGTGAGCTGTAAAGCCTGCAATGAA  
ACCTGCCCTTGGCCTAATGTTTTGAGCAGCTGATAGCCTATAATGAAAATGCAGAGTAAGAGGGATGCCTAT  
ACATGTTTGCCACATGTTTGTCTAAGATATGTATCTACAAGTAGACACAGATTTTCTCACTGGACAGAAATCA  
TTATAGAGGTGTTTTATGATTTGGGATGTAGGTGAGATTTGTTTAACTTTTTGTTAAATGTAGTGTCTTTCAG  
TCAGAATTACAGTCATTAATGTTTTATTTGTTTAGGGTAATGGGGACAACCAGTGAATGCATATATTGCATTG  
AATGCAGCGTTGTATGTTATCTGTATTAGAGGACTTACCAATTTGTATACTGTTGGTTACTATTATCA AATCA  
AGTATATTTTGTAAATCAAGGGGTGGAATGTAGCACGGTGGATTTTCTATTGATTTTATGATTTACAAATATAT  
ATACATCTGCTTTGACATATGAATCAAATCTTAGGTTT GAGTCAAGTAAAAGCAGCAGATTTTGGGACAGCTA  
TTGTCTAGTGTTC AAGGTATAATGTCTTTGTTCTATGTATATTGCTGGGTAAACAGTAAACACAGGTATTGTT  
ACCCAGCAAATATCCTTGGAAATAACAACAGACAGCATATAGACAATACTTTATGTACA ACTTATTTGAG  
CAACAAATAAGGCCTTCTAAGTCTAGTTAATAGGTTTTGTTTCATGACAAAAGTTTGTACACAAGTCAGCACTT  
GGTGTGGGGGTTTGCTAAGA ACTTACTATAAAAAGGAGCCTCCACCATGGGTGGTAGCTTCGCCTAGGAC

TCCTGAACGAGTGCCGGGACATTTGGATCATCGCTTGGTTATCGGGAACCTGAAGGTCTTGCGCCAAAGGTTG  
TGGGGCTCCCCGATTGTGCTGAATTGTGCAGAAGCTGGCTATACTTGTAACTAATCATACTAAGATAAGTAAAT  
CTATTTGATTCTATTACTTGTGTGTGTGTAAGTTATTGCTCACTAAAAGTCTATCAGAAGGTTAATCAT  
TGATCCTGCATATTTATTAATATTTGTCATTAATGTCAATTAATACAAATTATTAATATTAATAAAGGTTTAC  
CCCCTTTTTTACA

>Xt-S16\_CM004448.2:73921067-73917599 *Xenopus tropicalis* strain Nigerian  
chromosome 6, whole genome shotgun sequence

TGTAGCACGGTGGATTTTCTATTGATTTTATGATTTACAATATATACATCTGCTTTGACATATGAATCAAATC  
TTAGGTTTGGAGTCAAGTAAAAGCAGCAGATTTTGGGACAGCTATTGTCTAGTGTTC AAGGTACAATGTTTTTGT  
TTCTATGTATATTGCTGGGTAAACAGTAAACACAGGTATTGTTACCCAGCAAATATCCTTGAATAAACAAAC  
AGACAGCATATAGACAATACACTTTATGTACAACCTATTGAGCAACAAATAAGGCCCTTCTAAGTCTAGTTAA  
TAGGTTTTGTTCATGACAAAAGTTTGTACACAAGTCAGCACTTGGTGTGGGGGTTTGTCTAAGAACTCTACTA  
TAAAAGGAGCCTCCACCATGGGTCGGTAGCTTCGCCTAGGACTCCTGAACGAGTGCCGGGACAATTGGATCA  
TCGCTTGGTTATCGGGAACCTGAAGGTCTTGCACCAAAGGTTGTGGGGCTCCCCGATTGTGCTGAATTGTGCA  
GAACTGGCTATACTTGTAACTAATCATACTAAAGATAAGTAAATCTATTTAATTCTATTATTACTTGTGTGTG  
TGTAAGTTATTGCTCACTAACAGTCTATCAGAAGGCTTAATCATTGATCCTGCATATTTATTAATATTTGTCA  
TTAATGTCAATTAATACAAATTATTAATATTAATAAAGGTTTACCCCTTTATTACATTTGGCGTAGTCGGCA  
GGATTAACCCTTTTGATGCTGGGAAGTGCAGTAATAACTTGTATAGAAATTGTAGAATTTATAGTGCAGCTTT  
GTATGGTAGTGTAGTGGCAGTATTGTAGTGGCTTGTGCAGGGCAAACATACTGTTGAAAAGTTAGCAATAATGT  
TCTGTTGGTTGAAAAACAAAGTTAGAGGGGTAGATGATCAAACGAGCAACCTTCCACATGGGCTAGTTCCGG  
ACCCTGGACCCATGTTGCTCGGGATGCGATAGGAGATCAGCAACTCTCTCAGGTGACTCACCCGATCACCTG  
TTGCTGAATTTGGATTTGTCTATGTGTTCCAAGGAGCAGATGTCTCAGCACAGTTGGGTTGGTTGTGTTTTC  
AGGCGCTCAGGGAGGAGACAATCCAAAAGGAGGCGGTTGAGCTTGAGCTGCAGGCAGTTAAAGATCAGCTAGC  
CACAATGAGAGAATGTTGGGCACCTCATTAGCACACAATGAGGAGATGGAGATAGAATTTACAAAAATATGT  
GGTAAGAACTCTGAGTAAAAAGCACCATAGAAAAGGGACAGAACAAGAAGAAAATGGTGTATTAGTTAAAGTA  
AGAACTCTTGTAAGTAAAAGAGACTAAGGGAGTGATTTATTTCTCAAGATAGAGAAAACAAAATAAATGTTACA  
TTGTGTTAAATTGTAAGTGTATGTTAATGTCAATATGTTTTTCTGTTCCAGGATTTAAGAACTGATTATTTTGA  
GTTAATATGGATTTTAATAACAGGCATCAAGAGTTGATGGATCCATTATTTTTGACACTTTTTGTTTTGTTTT  
TTTAAGTGCACAAATTTGTGCGTAAAGGCCCTTAAGACAGGTCTGTTTTTGTAAAAAAAAGTTTAAACAATGA  
AACTTGAAAGTTTTTAAACACTTTTTGTTGTATGTTTCTGAGAATGTGTGGGCCACATGCATGTTGTTATGGT  
TTGTCTTGTCTTAATTGTGACAATGACTTAAATGTGACAGTGACTGAAAAATTCTTGACAAAGTAATACAAAA  
TTAAGAAAGTTGTTAAAGTTGACAAAACAGATCTTAAATGCTAAGAAGTATGTTGCCTTGATCTTTTTGTTTT  
ATAGATGTTTATCAAGTGCATTAACAAATGAGTTAATAGCAAAACAATTGACAGCAAAACAAGGATTTGGACAT  
TGTTAATTTTGAATGGACATCAGTAACAAAGTCAACAAACAAGTATTGAAGAACATGGAATTCATTTGAATG  
GTGACCTGGAACTTAAATGGACATTTGGTTTTGGACTTTATAAATTAATACTTATGTTTTGTTCAACTGTTTC  
TACAGGCTGAAATTAGCATTGCATACATTATTGTAATAATGGTAATAGGAATGTAATGGCTTGTACATGAAC  
TGTAAGTGCTAGTTAGTGGGTTTTATAGCACAGGCAGCACAGCTGAACTGTATATCTCCTATGGTATATAAT  
ATTGTGCAGTGAACCTGCAGTATAGAGCAAGCCACTGGCAATCTGTGAATTTAGGTAAAATGCCAGAGGGGCTG  
CTGTAAGATACCACAGACACTCACTATTTATTGGCCGGGTGGGGGCTGTTTGGGGCTCTGTGTACTTGAATA  
TCAGGGCCTATTTTGAACAAAACAGAAAGAGTGAATTTATCATCCTGAGGGAAAAATGCTATGTGAACTAA  
CAATGTCTGTAGACAAGCATTATGGTATAATTGTTGTAAGTGTGAATAGAGTAATGTAATTTTATGAGTTAGT  
ACTATGATATCAATGGAGTTAGCTGAATGTTGGCTGTAAGAGAGTTTGGACAACCTCTATATGATTGAAGTGAA  
AGCCTTTTAAAGACTACAAGTTAATACACAATTCTGCTGAGGGACACGTTAGTTTACAAGAAGTCACTGTTAG  
ACTTGATAGTATCATCCCAAGTGATTTGAATGCCCTGGGTGATTTGTGGCCTTATGGGTGGAATTTGTGGCTA  
CTGGTGATAGACATATTTTGGAAAAGCATTGGCAGAATGTGTACTGAGGCTACAATCTGCTGAAAGGAATTC  
AGTTGCCATTTGGTATATAAAAAGGGGTTAGGTAGAAAACAAGTGCATGGCAGATACATAATATAGTAAACAT  
ATTGCTTATCAAAGAAGCACTGTTTAACTATGTGAGCTGTAAAGCCTGCAATGAAACCTGCCCTGGGCCTAAT  
TGTTTTGAGCAGCTGATAGCCTATAATGAAAATGCAGAGCAAGAGGGGTGCCTATACATGTTTGGCCACATGAT  
TGCCCAAGATATGTATCTACAAGTAGACACAGATTTTCTCACTGGACAGAAATCATTATAGAGGTGTTTTATG  
ACTTGGGATGTAGGTGAGATTTGTTTAACTCTTTTGTAAAATGTAGTGTCTTCAGTCAGAATTTACAGTCATTA  
ATTGTTTTATTTGTTTAGGGTAATGGGGACAACCAGTGAATGCATATATTGCATTGAATGCAGCATTGTATGTT  
ATCTGTATTAGAGGACTTACCAATTTGTATACTGTTGGTTATTATTATCAAATCAGTATATTTTGTAAATCAA  
GGGGTGAATGTAGCACGGTGGATTTTCTATTGATTTTATGATTTACAATATATACATCTGCTTTGACATATG

AATCAAATCTTAGGTTTGAGTCAAGTAAAAGCAGCAGATTTTGGGACAGCTATTGTCTAGTGTTC AAGGTACA  
ATATTTTTGTTCTATGTATATTGCTGGGTAAACAGTAA

>Xt-S17\_CM004448.2:c1899534-1894643 *Xenopus tropicalis* strain Nigerian  
chromosome 6, whole genome shotgun sequence

GATTTTCTATGATTTACAATATATACATCTGCTTTGACATATGAATCAAATCTTAGGTTTGAGTCAAGTAAAA  
GCAGCAGATTTTGGGACAGCGATTGTCCAGTGTTC AAGGTACAATGTCTTTGTTCTATGTATATTGCTGGGTA  
AACAGTAAACACAGGTATTGTTACCCAGCAAATATCCTTGGAATAAACAGACAGACAGCATATAGACAATACA  
TTTTATGTACAACCTTATTTGAGAAACAATAAGGCTTTCTACAAAGTTAGTAAATTGTCTAGTTAGGTTTTGT  
TCATGACAAAAGTTTGTACACAATATTGCACAATAAGTCAGCACTTGGTGTGGGGGTTGCAAAGACCTCTG  
GTATAAAAGGGAGCCTCCACCATGGGT CAGTAGCTTCGCCTAGGACTCCTGAATGAGTGCTGGGACATTTGGA  
TCATCGCTTGGTTATCGGGAACCTGAAGGTCTTGCGCCAAAGGTTGTGGGGCTCCCCGATTGTGCTGAATTGT  
GCAGAACTGGCTACACTGTAACTATAATCATACCAAGATAAGTAAATCTATTTGATTCTATTATTACTTGTG  
TGTGTGTAAGTTATTGCTCACTAATAGTCTATCAGAAGGTTTAATCATTGATCCTGCATATGTATTAATATTT  
GTTATTAATGTCAATTAATACAAATTATTAATATTAATAAAGGTT CACCCCCTTTATTACATTTGGCGTAGTC  
GGCAGGATTAACCTTTTTGATGCTGGGAAGTGCAGTAATAACTTGTATAGAAATTGTAGAATTTATAGTGCAG  
CTTTGTATGGTAGTGTAGTGGCAGTATTGTAGTGGCTTGTGCAGGGCAAACATACTGTTGAAAGTTAGCAATA  
ATGTTCTGTTGGTTGAAAAACAAAATTAGAGGGGTAGATGATCAAACGAGCAACCTTCCCACATGGGCTAGTT  
CCGGACCCTGGACCCATGTTGCTCGGGATGTGATAGGAGATCAGCAACTCTCTCAGGTGACTCACCCCGATCA  
CCTGTTGCTGAATTTGGATTTGTCTATGTGTTCCAAGGAGCAGAAGTCCTCAGCACAATTGGGTTGGTTGTGT  
TTTCAGGCGCTTAGGGAGGAGGCAGTCCAAAGGGAGGCAGTTGAGCTTGAGCTGCAGGCAGTTAAAGATCCAC  
TAGCCACAATGAGAGAATGTTTGCCTCCTCATTAGCACACAATGAGGAGTTGGAGATAGAATTTACAAAATA  
TGTGGTAAAAACTATGAGTAACAATCACCATAGAAAAGAGACAGAACAAGAAGAAAATGGTGCATTAGTTAGA  
ATAAGAGCTCTTGTAAGTAAAGGAGACTGGGGGGAGTTAGCCAGTGGTCAGGAGCACATGAGGAAGTTCAAG  
AAGACATGATAAGACCTCTTGTGACTACAAGACAAGTCAGTCAAAGTGCAGATATTGTTGACAGATCTTCAGG  
AAATACAGAAGCAGCAGATCAACAGTACATTGAGCAACCAAGTTTATCTGCTGCAGTAGTTAAGTTGGGTCAG  
CCAATTTCCAGGTAGGAGGAGAAAGTGGTGTGCTTACAGATCCATTAACCTCAGTACTCCCAAACCCACATA  
CAGTAAAAGAAGAATGGGAAAGGCCAGACAAAGTTCCATTTACTGCACATATGAAGAATACATTGCTAGTAGG  
ATCTCCCACCCATTTAAAAGCCCCATTGTTACATAAAAAGTGCATATTTGTTGGGCAGATTAGAATGTGCAGAG  
GAAAACATTCCTAAGCAAAGGGTAGTAAAAGTCTGGGGTACAAAAGGTTAAAAAACAGTCGCAGGCAGATGT  
TTTTAGATTTGCTTCAATATGGTGTACCAAAGCCTGAAATTGATGGTATTCCCCTGCTGATTTGTTGAAGCG  
CTGGAAAAAAGTGCAGACAAAAGGTGAGGTTGAAATTACCACAACCACAGAATGTGGCAACCTGTAATGTAGAG  
GACCTATCTTCCCTTTTAGCCCATACATAGAAAAGGAAATGGCTAAACATAAGGGGAACATCTAGGAGGTTAT  
ATGAGAGGATAACTAGTGATAGTTTAGGAAAAGTACAGAAGCAAACAATGTTGAGAATGGTATAATTCTACT  
GGTTTAGAAATAGAACAGCTGTATATTGTAATAATGTGTTTCTCTTTGTATGTAAAGAATTGCTGCCCCCTCCC  
TTTAGACACAGACTAGTTCAACTGAGGGAGTGATTTATTTCTCAAGATAGAGAAAACAAAATAAATGTTACATT  
GTGTTAATTTTACTGTATGTTAATGTCAATATGTTTTCTGTTTCAGGATTTAAGAATCTGATTATTTTGTAGT  
TAATATGGTTTTTAATTACAGGCATCAAGATTTGATCAAGAGTTGATTTACGCACAAAATTTGTGCGTAAAGGC  
CTTAAGACATTCCTATTTTGTAAAAAGTTTTTTTTTAAAAGTGTAGTACTACAATTAACAATGAAACTTGAAA  
GTTTTTAACACTTTTTTTGTTGTATGTTTCTGAGAATGTGTGGGCCACATGCATGTTGTTATGGTTTTGTCTT  
GCTTAATTGTGACAATGACTTAAATGTGACAGTGACTGAAAAAATCTTGACAAAATAATAGAAAATTAAGAA  
ACTTGATAAAGTTGACAAAACAGATGTTAAATGCTAAACAAGTGTGTTGCCTTGATATTTTGTTTTATAGATG  
TTTATCAAGTGCATTAACAAAATGGGTTAATAGCAAAAACAATGGACAGCAAACAAGGATTTGGACATTGTTTAT  
CTCAATGGACATCAGTACAAAGTATTGAAGAACCTGGAAATTCATTTGAATGGTGACCTGGAAACTTAAATGG  
ACATTTGGTTTTGGACTTTATAAATGAATATTTATGTTTTGTTCAATTTGTTTCTACTGGCTGAAATTAGCATTG  
CATACACTATTGTACTAATGGTAATAGGAATGTTATGGCTTGTACATGAACTGTAAAGTGCTAGTTAGTGGG  
TTTTAGAGCACAGCTGAACTGTATATCTCCTATGGTATACAGTATAATATTGTGCAGTGAACCTGCAGTATAG  
AGCAGGCCCTGGCTGACAATCTGTAGATTCTGGCAAAATGCCAGAGGGGCTGATGTAAGATGCTATAGACAGTC  
ACTATTTATTGGGATTGTGGGAGCTGTTGGGTCACTGTGTATTTGAAATGCCAGGGTCTATTTTGAATTTAG  
AGTCTATGAAACTCTTTGATAAAACACTCTTTGAGTGAAATTTATTATTCTGAGGGAGAAAATTTGTTATGTGAA  
ACTAACAATGTCTGTAGACAAGTACTGTATTATGGTATAAGTAATTATTGTAAGTGTGAATACGGTAATGTCA  
TTTTGTGAGTTAGTACTGTGATATCAATGGGGTTGGCTGAAGGAGAGTTTGGACAACCTATATGAAGTTAAA  
GACTACAACCTAATATACAATTCGTTGAAGGACACAGTAGTTTATAAGAAGTCACTGTTAGACTTGATAGTA  
TCATCCCAAGTGATTTGAATGCCCTGGGTGATTTGTGGCTTATGGGTGGAATTTGTGGCTACTAGTGATAGA

CTGATATTTTGGAAAAGCATTGGCAGAATGTGTATTGGGACTAAAACCTCTGCTGAAAGGAATTCAGTTGCCAT  
TTGGTCTATAAGAGGGGGTTAGGTAGAAACACAGTGCATGGCAGATACATAATATAGTAAACATATTGCTTA  
TCAAAGAAGCACTGTTTAACTATGTGAGCTGTAAAGCCTGCAATGAAACCTGCCCTTGGCCTGATTGTTTTGA  
GCAGCTGATAGATTATAATGAAAATGCAGAGCAAGAGGGATTCCCTATACATGTTTGCAACATGTTTGCCCAAG  
ATATGTGTCTACAAGTAGACACAGATTTTCTCACTGGACAGAAAGCATTATAGAGATGTTTTATGACTTGGGA  
TGTAGGTGAGATTTGTTAATCTTTTGTTAAATGTAGTGTCCCTCAGTCAGAATTACAGTAATTAATTGTTTA  
TTTGTTTAGGGTAATGGGGACAACCAGCGAATGCATATATTGCATTGAACACAGCATTGTATGTTATCTGTAT  
TAGAGGACTTACCAATTTGTAAACTGTTGGTTATTATTATCAAATTAGTATATTTTGTAAATCAAGGGGTGGA  
ATGTAGCACGGTGGATTTTCTATGATTTACAATATATACATCTGCTTTGACATATGAATCAAATCCTTAGGTTT  
GAGTCAAGTAAAAGCAGCAGATTTTGGGACAGCTATTGTCCAGTGTTC AAGGTACAATGTCTTTGTTCTATGT  
ATATTGCTGGGTAAACAGTAAACACAGGTATTGTTACCCAGCAAATATCCTTGGAAATAAACAGACAGACAGCA  
TATAGACAATACATTTTATTTACAACCTATTTTGAGAAAACAATAAGGCTTTCTACAAAGTTAGTAAAGTGTCT  
AGTTAGGTTTTGTTTCATGACAAAAGTTTGTACACAATATTGCACAATAAGTCAGCACTTGGTGTGGGGGTTT  
GCAAAGACCTCTGGTATAAAAAGGAGCCTCCACCATGGGTCAGTAGCTTCGCCTAGGACTCCTGAATGAGTGC  
CGGGACATTTGGATCATCGCTTGGTTATCGGGAACCTGAAGGTCTTGCGCCAAAGGTTGTGGGGCTCCCCGAT  
TGTGCTGAATTGTGCAGAACTGGCTATACTTGTAACTATAATCAAACAAAGTTAAGTAAATCTATTTAATTCT  
ATTATTACTTGTGTGTGTGTAAGTTATTGCTCATTAATAGTCTATCAGAAGGTTAATCATTGATCCTGCATA  
TGTATTAATATTTGTTATTAATGTCAATTAATACAAATTATTAATATTAATAAAGGTTACCCCCCTTTATTAC  
A

>Xt-S18\_CM004449.2:c61019258-61015158 *Xenopus tropicalis* strain Nigerian  
chromosome 7, whole genome shotgun sequence

TGTAGCACGGTGGATTTTCTATTGATTTTATGATTTACAATATATACATCTGCTTTGACATATGAATCAAATC  
TTAGGTTTGGAGTCAAGTAAAAGCAGCAGATTTTGGGACAGCTATTGTCTAGTGTTC AAGGTACAATGTCTTTG  
TTCTATGTATATTGCTGGGTAAACAGTAAACACAGGTATTGTTACCCAGCAAATATCCTTGGAAATAACAAAC  
AGACAGCATATAGACAATACACTTTATGTACAACCTATTTGAGCAACAAATAAGGCTTCTAAGTCTAGTTAA  
TAGGTTTTGTTTCATGACAAAAGTTTGTACACAAGTCAGCACTTGGTGTGGGGGTTTGTCTAAGAACTCTACTA  
TAAAAGGAGCCTCCACCATGGGTCGGGAGCTTCGCCTAGGACTCCTGAACGAGTGCCGGGACATTTGGATCA  
TCGCTGGGTTATCGGGAACCTGAAGGTCTTGCGCCAAAGGTTGTGGGGCTCCCTGATTGTGCTGAATTGTGCA  
GAACTGGCTATACTTGTAACTAATCATACTAAGATAAGTAAATCTATTTAATTCTATTATTACTTGTGTGTAA  
GTTATTGCTCACTAACAGTCTATCAGAAGGTTAATCATTGATCCTGCATATTTATTAATATTTGTCTATTAAT  
GTCAATTAATACAAATTTATTAATATTAATAAAGGTTACCCCCCTTTATTACATTTGGCGTAGTCGGCAGGATT  
AACCCTTTTGTATGCTGGGAAGTGCAGTAATAACTTGTATAGAAATTTATAGTGCAGCTTGTATGGTAGTGTAG  
TGGCAGTATTGTAGTGGCTTGTGCAGGGCAAACATACTGTTGAAAGTTAGCAATAATGTTCTGTTGGTTGAAA  
AACAAAGTTAGAGGGGTAGATGATCAAACGAGCAACCTTCCCACATGGGCTAGTTCGGGACCTGGACCCATG  
TTGCTCGGGATGTGATAGGAGATCAGCAACTCTCTCAGGTGACTCACCCCGATCACCTGTTGCTGAATTTGGA  
TTTGTCTATGTGTTCCAAGGAGCAGAAGTCTCAGCACAAATTGGGTTGGTTGTGTTTTCAGGCGCTCAGGGAG  
GAGACAGTCCAAAGGGAGGCAGTTGAGCTTGTAGCTGCAGGCAGTTAAAGATCAACTAGCCATAATGAGAGAAT  
GTTTGCCTCCTCATTAGCACACAATGAGGAGTTGGAAATAGAATTTACAAAATATGTGGTAAAAACTATGAG  
TAACAATCACCATAGAAAAGAGACAGAACAAGAAGAAAAATGCTGCATTAGTTAGAGTAAGAGCTCTTGTAAAGT  
AAAGGAGACAGGGGGGAGTTAGCCCAGTGGTCAGGAGCACATGAGGAAGTTCAAGAAGACATGATAAGACCTA  
TTGTGACTACAAGACAAGTCAGTCAAAGTGCAGGTATTGTTGACAGATCTTCAGGAAATACAGAAGCAGCAGA  
TCAACAGTACATTGAGCAACCAAGTTTATCTGCTGCAGTAGTTAAGTTGGGTCAGCCAATTTCCCAGGTAGGA  
GGAGAAAGTGGTGTGCTTACAGATCCAATAACTTCAGTACTCCCAAACCCACATACAGTAAAAGAAGAATGGG  
AAAGGCCAGACAAAGTTCCATTTACTGCACATATGAAGAATACATTGCTAGTAGGTTCTCCCACCCATTTAAA  
AGCCCCGTTGTTACATAAAACTGACATATTGTTGGGTAGATTAGAATGTGCAGAGGAAAAACATTCCTAAGCAA  
AGGGTAGTAAAAGTCTGGGGTACAAAAGGTTAAAAACAGTTCGCAGGCAAATGTTTTTAGATTTGCTTCAAT  
ATGGTGTACCAAAGCCTGAAATTTGATGGTATTCCCCTGCTGATTTGTTGAAGCGCTCACAAAAGGTGAGTTT  
GAAATTACCACAACCACAGAAATGCGGCAACCTGTAATGTAGAGGACCTATCTTTCTTTTATCCCATACATAG  
AAAAGGAAATGGCTAAACATATGGGAGGAGGACATCTAGGAGGTTATATGAGAGGATAACTAGTGATAGTTTA  
GGAAAATACAGAAGCAAAACAATGTTGAGAATGGTACAATTTCTACTGGTTTAGTAATAGAACAGCTGTATAT  
CGTAAAAGGTGTTTCTCTTTGTATGTAAAGAATTGCTGCCCCCTCCCTTTAGACACAGACTAGTTCAACTGAG  
GGAGTGATTTATTGCTCAAGATAAGAGAAACAAAACTAAATGTTACAGTGTGTTAATTTGACTGTATGTTA  
ATGTCATATGTTTTTTTGTTCAGGATTTAAGAATCTGATTATTTTGGAGTTAATATGTTTTTTAATAACAGGC

ATCAAGAGTTGATGGATCCATTATTTTTTACACTTTATTTGTTTTGTTTTTAAGTGCACAAATTTGTGCGTAA  
AGGCCTTAAGACATGTCTATTTTTGTTAAAAAGTTTTTTTAAAACCTGTAGTACTACAATTAACAATGAACTTG  
AAAGTTTTTAACACTTTTTGTTGTATGTTTCTGAGAATGTGTGGGCCACATGTATGTTGTATAGTTTGTCT  
TGTCTTAATTTGACAATGACTTAAATGTGACAGTACTGAAAAAAGTCTTGACAAAATAATACAAAATTAAG  
AAAGTTGTTAAATTTGACAAAAACAGATCTTAAATGCTAAGAAGTGTATGTTGCCTTGATCTTTTTGTTTTATAG  
ATGTTTATCAAGTGCATTAACAAATGGGTTAATAGCAAAACAATGGACAGCAAAACAAGGATTTGGACATTGTT  
TATCTTCAATGGACATCAGTACAAAGTATTGAAGAACCTGGAATTCATTTGAATGGTGCCTGGAACTTAAA  
TGGACATTGGTTTTGGACTTGGACTTTGGATAAATGAATATTTATGTTTTGTTCAATTGTTTCTACCGGCTGA  
AATTAGCATTGCATACACTATTGTACTAATGGTAATAGGAATGTTATGGCTTGTTACATGAACTGTAAAGTGC  
TAGTTAGTGGGTTTTAGAGCACAGGCAGCACAGCTGAACTGTATATCTCCTATGGTATATAATATTGTGCAGT  
GAACCTGCAGTATAGAGCAGGCCCTGGCTGACAATCTGTAGATTTAGGCAAATGCCAGAGGTGCTGCTGTAAG  
ATGCCATAGACAGTCACTATTTATTGGGCTGATGGGGTCTGTTTGGGTCTCTGTGTATTTGAAATGCCAGGGT  
CTGTTTTGAAATTAGTGTCAACAAAACCTTTTGATAAAAACAGAAAGAGTGAATTTTATTCTGAGGGAGAA  
ATTGTTATGTGAAACTAACAATGTCTGTAGACAAGCATTATGGTATAATTGTTGTAAGTGTGAATAGGGTAAT  
GTAATTTTATGAGTTAGTACTATGTTATCAATGGAGTTAGCTGAATGTTGGCTGTAAGAGAGTTTGGACAAC  
CTATATGATTGAAGTGAAGCCTTTTTAAAGACTACAAGTTAATATAACAATCTGTTGAGGGACACGTTAGTTT  
ACAAAAAGTCACTGTTAGACTTGATAGTATCATCCCAAGTGATTTGAATGCCCTGGGTGATTTGTGGCCTTAT  
GGGTGGAATTTGTGGCTACTAGTGTATCGACTGATATTTTGAAAAGCATTGGCAGAATGTGTATTGGGACTAA  
AACTCTGCTGAAAGGAATTCAGTTGCCATTTGGTCTATAAGAGGGGGTTAGGTAGAAAACAAGTGCATGGCA  
GATACATAATATAGTAAACATATTGCTTATCAAAGAAGCATTGTTAACTATGTGAGCTGTAGAGCCTGCAAT  
GAAACCTGCTCTTGGCCTAATTGTTTTAAGCAGCTGATAGCCTATAATGAAAATGCAGAGCAAGAGGGATGCC  
TATACATGTTTGGCCATGATTGCCCAAGATATGTATCTACAAGTAGACACAGATTTCTCACTGGACAGAAA  
TCATTATAGAGGTGTTTTATGACTTGGGATGTAGGTGAGATTTGTTTAAATCTTTTGTAAATGTAGTGTCTT  
CAGTCAGAATTACAGTCATTAATTGTTTTATTTGTTTAGGGTAATGGGGACAACCAGTGAATTCATATATTGCA  
TTGAATGCAGCAT

>Xt-S19\_CM004446.2:1821190-1829189 *Xenopus tropicalis* strain Nigerian  
chromosome 4, whole genome shotgun sequence

TGTAACACGGTGGATTTTCTATTGATTTTATTTTACAATATATACATCTGCTTTGACATATGAATCAAATCTT  
AGGTTTGGAGTCCAGTAAAAGCAGCAGATTTTGGGACAACCTATTGTCCAGTGTTC AAGGTACAATGTCTTTGTT  
CTGTGTATATTGCTGGGTAAACAGTAAACACAGGTATTGTTACCCAGCAAATATCTTTGGAATAAACAAACAG  
ACAGCATATAGACAATACACACAATGTACAACCTTATTTGAGCAACAAATAAGGCTTTCTACAAAGTCTAGTTA  
ATAGGTTTTGTTTCATGACAAAAGTTTGTGCACAAGTCAGCACTTGATGTTGGGGGTTTTGCTAAGAAGTCTGG  
TATAAAAGGGGCCCCACCCTGTGTGTCAGTAGCTTCGCCTGGGGCTCCTGAACCAGTGTGGGACATTTGGATC  
ATCGCTTGGTTATCGGGAACTGAAGGTCTTACACCAAAGGCTGTGGGGCTCCCGATTAGGCTGAATTGTGCA  
GAACTGGCTGTACTTGTAACTATAATCATACAAAGATAAGTAAATCTATTTGATTCTATTATTACTTGTGTGT  
GTGTAAGTTATTGCTCACTAACAGTCTATCAGAAGGTTAATCATTGATCCTGCATATTTATTAATATTTGTC  
ATTAATGTCAATTATTACAAATTTAATATTAATAAAAGGTTACCTCTTTATAACATTTGGCGTAGTCAGCA  
GGATTAACCCTTTTGATGCTGGGAAGTGCAGTAATAACTTGTATAGAAATTGTAGAATTTATAGTGCAGCTTT  
GTATGGTAGTGTAGTGGCAGTACTGTAGTGGCTTGTGCAGGGCAAAGATACTGTTGAAAAGTTAGCAATAATGT  
TCTGTTGGTTGAAAAACAAAGTTAGAGGGGTAGATGATCAAACGAGCAACCTTCCCACGTGGGCTAGTTCCGG  
GTCCCTGGACCCATGTTGCTCGGGATGTGATAGGAGATCAGCAACTCTCTCAGGTGACTCACCCCATCACCT  
GTTGCTGAATTTGGATTTGTCATGTGTTCCAAGGAGCAGAATCCTCAGCACAATTGGGTTGGTTGTGTTTTTC  
AGGCGCTCAGGGAGGAGACAGTCCAAGGGAGGCAGTTGAGCTTGAGCTGCAGGCAGTTAAAGATCAACTAGC  
CACAATGAGAGTATGTTGCGCTCCTCATTAGCACACAATGAGGAGTTGGAGATAGAATTTACAAAATATGTG  
GTAAGAAGTATGAGTAAAAGCACCATAGAAAAGGGACAGAACAAGCAGAAAATGGTGTATTAGTTAAAGTAA  
GAACTCTTGTAAAGTAAGGGCTCTGGTACACGGGGAGATTAGTCCCGCGGGCAAACTCCCTACTCGCGGGCG  
ACTAATCTCCCCGAGTTGCCTTCCCTCTGCCATCCCTGGCAGAGGGAAGGCAACTCGGGGAGATTAGTCGCC  
GCGAGCAGGGAGTTTTGCCGCGGGCGACTAATCTCCCCGTGTACCAGAGCCCTAAAAGAGACTAAGGGAGTGA  
TTTTATTTCTCAAGATAGAGAAACAAAATAAATGTTACATTTGTGTTAATTGTACTGTATGTTAATGTCAATG  
TTTTCTGTTTTCAGGATTTAAGAATCTGATTATTTTGGTAAATATGGTTTTTAAATAACAGGCATCAAGAGTTG  
ATGGATCCATTATTTTGCACACTTTTTGTTTTGTTTTTAAAGTGCACAAATTTGTGCGTAAAGGCCTTAAGAC  
ATGTCTGTTTTTGTAAAAAAGTAAACAATGAAACAACCTTTTTGTTGTATGTTTCTGAGAATGT  
GTGGGCCACATGCATGTTGTTATGGTTTGTCTTGTCTTAATTGTGACAATGACTTAAATGTGACAGTGACTG

AAAAAGTCTTGACAAAATAATACAAAATTAAGAAAGTTGATAAAGTTGACAAAACAGATCTTAAATGCTAAGA  
ACTGATGTTGCCTTGATCTTTTGTTTTATAGATGTTTATCAAGTGCATTAACAAATGGGTAAATAGCAAACA  
ATGGACAGCAAACAAAGATTTTGACATTGTTAATCTTGAATGGACATCAGTACAAAGTATTGAAGAACCTGGA  
ATTCATTTGAATGGTGACCTGGAACCTTAAATGGACATTGGTTTTGGACTTCATAAATGAATACTTATGTTTT  
GTTCAACTGTTTCTACAGACTGAAATTAGCATTGCATACACTATTGTACTAATGGTAATAGGAATGTTAGGGC  
TTGTTACATGAACTGTAAAGTGCTAGTTAGTGGGTTTTATAGCACAGGCAGCACAGCTGAACTGTATATCTCC  
TATGGTATATAATATTGTGCAGTGAACCTGCAGTATAGAGCAGGCCCTGGCAGACAATCTGTAGATTCAAGCA  
AATGCCAGAGGTGCTGATGTAAGATGCCATAAACAGTCACTATTTATTGGGCTGGGGGGGCTGTTTGTGCCTC  
TGGGTACTGGGAATGCCAGGGGGGCTGTAAGGTGCCACAGACAGTCACTATTTATTGGGCTGGGGGGGCTGTT  
TGTGCCTCTGGGTACTGGGAATGCCAGGGGGGCTGTAAGGTGCCACAGACAGTCACTATTTATTGGGCTGGGGG  
GGGCTGTTTGTGCCTCTGGGTACTGGGAATGCCAGGGGGGCTGTAAGGTGCCACAGACAGTCACTATTTATT  
GGGCTGGGGGGGGGCTGTTTGTGCCTCTGGGTACTGGGAATGCCGGGGGGGCTTTAAGGTGCCACAGACAGT  
CACTATTTATTGGGATGGGGGGGCTGTTTGTGCCTCTGGGTACTGGGAATGCCAGGGGGGCTGTAAGGTGCCA  
CAGACAGTCACTATTTATTGGGCTGGGGGGGGGCTGTTTGTGCCTCTGGGTACTGGGAATGCCGGGGGGGCT  
TTAAGGTGCCACAGACAGTCACTATTTATTGGGATGGGGGGGCTGTTTGTGCCTCTGGGTACTGGGAATGCCA  
GGGGGGGCTGTAAGGTGCCACAGACAGTCACTATTTATTGGGCTGGGGGGGGGCTGTTTGTGCCTCTGGGTACT  
GGGAATGCCGGGGGGGCTGTAAGGTACCACAGACAGTCACTATTTATTGGGCTGGGGGGGCTGTTTGTGCCTC  
TGGGTACTGGGAATGCCAGGGGGGCTGTAAGGTGCCACAGACAGTCACTATTTATTGGGCTGGGGGGGGGCTGT  
TTGTGCCTCTGGGTACTGGGAATGCCAGGGGGGCTGTAAGGTGCCACAGACAGTCACTATTTATTGGGCTGGG  
GGGGGCTGTTTGTGCCTCTGGGTACTGGGAATGCCGGGGGGGCTTTAAGGTGCCACAGACAGTCACTATTTA  
TTGGGATGGGGGGGCTGTTTGTGCCTCTGGGTACTGGGAATGCCAGGGGGGCTGTAAGGTGCCACAGACAGTC  
ACTATTTATTGGGCTGGGGGGGGGCTGTTTGTGCCTCTGGGTACTGGGAATGCCGGGGGGGCTTTAAGGTGC  
CACAGACAGTCACTATTTATTGGGATGGGGGGGCTGTTTGTGCCTCTGGGTACTGGGAATGCCAGGGGGGCTG  
TAAGGTGCCAACAGACAGTCACTATTTATTGGGCTGGGGGGGGGCTGTTTGTGCCTCTGGGTACTGGGAATGC  
CGGGGGGCTGTAAGGTACCACAGACAGTCACTATTTATTGGGCTGGGGGGGGGCTGTTTGTGCCTCTGGGTA  
CTGGGAATGCCCGGGGGGCTGTAAGGTGCCACAGACAGTCACTATTTATTGGGCTGGGGGGGCTGTTTGTGCC  
TCTGGGTACTGGGAATGCCAGGGGGGCTGTAAGGTGCCACAGTCACTATTTATTGGGCTGGGGGGGGGGGCTG  
TTTGTGCCTCTGGGTACTGGGAATGCCAGGGGGGCTGTAAGGTGCCACAGACAGTCACTATTTATTGGGCTGG  
GGGGGCTGTTTGTGCCTCTGGGTACTGGGAATGCCGGGGGGGCTGTAAGGTGCCACAGACAGTCACTATTTATT  
GGGGTGGGGGGGCTGTTTGTGGCCTCTGGGTCTGGGAGTGCCAGGGGGGCTGTAAGGTGCCACAGACAGTCA  
CTATTTATTGGGCTGGGGGGGGGCTGTTTGTGCCTCTGGGTACTGGGAGTGCCAGGGGGGCTGTAAGGTGCCAC  
AGACAGTCACTATTTATTGGGCTGGGGGGGCTGTTTGTGCCTCTGGGTACTGGGAATGCCAGGGGGGCTGTAAG  
GTGCCACAGACAGTCACTATTTATTGGGCTGGGGGGGGGCTGTTTGTGCCTCTGGGTACTGGGAATGCCAGGG  
GGGCTGTAAGGTGCCACAGACAGTCACTATTTATTGGGCTGGGGGGGGGCTGTTTGTGCCTCTGGGTACTGGG  
AATGCCAGGGGGGCTGTAAGATGCCATAAACAGTCACTATTTATTGGGCTGGGGGGGGGCTGTTTGTGCCTCTG  
GGTACTGGGAATGCCGGGGGGCTTTAAGGTGCCACAGACAGTCACTATTTATTGGGATGGGGGGGCTGTTTGT  
GCCTCTGGGTACTGGGAATGCCAGGGGGGCTGTAAGGTGCCACAGACAGTCACTATTTATTGGGCTGGGGGGG  
GCTGTTTGTGCCTCTGGGTACTGGGAATGCCAGGGGGGCTGTAAGGTGCCACAGACAGTCACTATTTATTGGG  
CTGGGGGGGCTGTTTGTGCCTTTGGGTACTGGGAATGCCAGGGGGGCTGTAAGGTGCCACAGACAGTCACTAT  
TTATTGGGCTGGGGGGGGCTGTTTGTGCCTCTGGGTACTGGGAATGCCAGGGGGGCTGTAAGGTGCCACAGTC  
ACTATTTATTGGGCTGGGGGGGGCTGTTTGTGCCTCTGGGTACTGGGAATGCCAGGGGGGCTGTAAGGTGCCA  
CAGACAGTCACTATTTATTGGGCTGGGGGGGGGCTGTTTGTGCCTCTGGGTACTGGGAATACCAGGGGGGGCTG  
TAAGGTGCCACAGACAGTCACTATTTATTGGGCTGGGGGGGCTGTTTGTGCCTGTGGGTACTGGGAATGCCAG  
GGGGGCTGTAAGGTGCCACAGACAGTCACTATTTATTGGGCTGGGGGGGCTGTTTGTGCCTCTGGGTACTGGG  
AATGCCGGGGGGGCTGTAAGGTGCCACAGACAGTCACTATTTATTGGGCTGGGGGGGGGCTGTTTGTGCCTCTG  
GGTACTGGGAATGCCAGGGGGGCTGTAAGGTGCCACAGACAGTCACTATTTATTGGGCTGGGGGGGGGCTGTTT  
GTGCCTCTGGGTACTGGGAATGCCAGGGGGGCTGTAAGGTGCCACAGACAGTCCACTATTTATTGGGCTGGGG  
GGGCTGTTTGTGCCTCTGGGTACTGGAATGCCAGGGGGGCTGTAAGGTGCCACAGACAGTCACTATTTATTG  
GGCTGGGGGGGGGCTGTTTGTGCCTCTGGGTACTGGGAATGCCGGGGGGGCTGTAAGGTGCCACAGACAGTCAC  
TATTTATTGGGCTGGGGGGGCTGTTTGTGCCTCTGGGTACTGGAATGCCAGGGGGGCTGTAAGGTGCCACAGAC  
AGTCACTATTTATTGGGCTGGGGGGGCTGTTTGTGCCTCTGGGTACTGGGAATGCTAGGGGGGCTGTAAGGTG  
CCACAGACAGTCACTATTTATTGGGCTGGGGGGGCTGTTTGTGCCTCTGGTACTGGGAATGCCGGGGGGGCTG  
TAAGGTGCCACAGACACTCACTATTTATTGGGCTGGGGGGGCTGTTTGTGCCTCTGGGTACTGGGAATGCCAG  
GGGGGCTGTAAGGTGCCACAGACAGTCACTATTTATTGGGCTGGGGGGGGGCTGTTTGTGCCTCTAGGTACTGG

GAATGCCGGGGGGGCTGTAAGGTGCCACAGACAGTCACTATTTATTGGGCTGGGGGGGGCTGTTTGTGCCTCT  
GGGTACTGGGAATGCCGGGGGGGGCTGTAAGGTGCCACAGACAGTCACTATTTATTGGCTGGGGGGGGGGCTGT  
TTGTGCCTCTGGGTACTGGGAATGCCAGGGGGGGCTGTAAGGTGCCACAGACAGTCACTATTTATTGGGCTGGG  
GGGGCTGTTTGTGCCTCTGGGTACTGGGAATGCCAGGGGGGGCTGTAAGGTGCCACAGACAGTCACTATTTATT  
GGGCTGGGGGGGGGGCTGTTTGTGCCTCTGGGTACTGGGAATGCCAGGGGGGGCTGTAAGGTGCCACAGACAGT  
CACTATTTATTGGGCTGGGGGGGGGGCTGTTTGTGCCTCTGGGTACTGGGAATGCCAGGGGGGGCTGTAAGGTGC  
CACAGACAGTCACTATTTATTGGGCTGGTGGGGGGCTGTTGGGCTCTGTGTATTTGAAATGCCAGGGTCTAT  
TTTGAATTAGTTTGAACGAACTCTTTGATAAAAACAGAAAGAGTGAATGTATTATCTGAGGGAGAAATT  
GTTATGTGAAACTGACAATGTCTGTAGACAAGTATTATGGTATAAGTAATTATTGTAAGTGTGAATAGGGTAA  
TGTTATTTTGTGAGTTAGAAGTGTGATGTCAATGGGGTTGGCTGAAGGAGAGTTTGGACAACCTCTATATGATT  
GAAGTTAAAGACTACAACCTAATATGCAATTCTGTTGAAGGACACAGTTGTTTATAAGAAGTCACTATTAGAC  
TTGATAGTATCATCCCAAGTGATTTGAATGCCCTGGCTGATTTGTGGTCTTATGGGTTGAATTTGTGGCTACT  
GGTGATAGACATATTTTGGAAAAGCATTGGCAGAATGTGTACTGAGACTAAAACCTCTGCTGAAAGGAATTCAG  
TTGTCATTTGGTCTATAAGAGGGGGGTTAGGTACAAACAAAGTGCATGGCAGATACATAATATAGTAAACATA  
TTGCTTATCAAAGAAGCACTGTTTAACTATGTGAGCTGTAAAGCCTGCAATGAAACCTGCCCTTGGCCTAATT  
GTTTTGAGCAGCTGATGGTCTATATTGAAAATGCAGAGCAAGAGGGATTCTATAACATGTTTGCCCAAGATAT  
GTATCTACAAGTAGACACAGATTTTCTCACTGGACAGAAAATCATTATAGAGGTGTTTTATGACTTGGGATGTA  
GGTGAGATTTGTTAATCTTTTGTAAATGTAGTGTCTTCAGTCAGAATTACAGTCATTAATTGTTTTATTTG  
TTTAGGGTAATGGGGACAACGAGTGTATGCATATATTGCATTGAATGCAGCATTGTATGTTATCTGTATTAGA  
GGACTTACCAATTTGTATACTGTTGGTTATTATTATCAAATCAGTATATTTTGTAAATCAAGGGGTGGAATGT  
AGCACGGTGGATTTTCTATTTGATTTTATAATGATTTATAATATATACATCTGCTTTGACATATGAATTAATC  
TTAGGTTTGGTCCAGTAAAAGCAGCAGATTTTGGGACAGCGATTGTCCAGTGTTCAGGTACAATGTCTTTG  
TTCTATGTATATTGCTGGGTAACAGTAAACACAGGTATTGTTACCCAGCAAATATCCTTGAATAAACAAAC  
AGACAGCATATAGACAATACATTTTATGTACAACCTATTTGAGCAACAAATGGGCCTTCTACAAAGTCTAGTT  
AATAGGTTTTGTTTCATGACAAAAGTTTGTACACAATTCAGCACTTGGTGTGGGGGGTGGTGAAGAAGTCTG  
GTATAAATGGGGCCCCCACCCTGTGTGCTAGTCTTCGCTGGGGCTCCTGAACCAGTGCCGGGACATTTGGAT  
CATCGCTTGGTTATCGGGAACCTGAAGGTCTTGCACCAAAGTGTGGGGCCCCCGATTGTGCTGAATTGTGC  
AGAAGTGGCTGTGCTTGTAGATAAGTAAATCTATTTAATTCTATTAGTACTTGTGTGTATGTAAGTTATTGCC  
CACTAACAGTCTATCAGAAGGTTTAAATCATTGATCCTGCATATGTATTACTATTTGTCATTAATGTCAATTA  
TACAAATTATTAATATTAATAAAAAGGTTTCAACCCCTTTATTACA

>Xt-S20\_CM004448.2:4091567-4105257 *Xenopus tropicalis* strain Nigerian  
chromosome 6, whole genome shotgun sequence  
TGTAGCACCGTGGATTTTATTTGATTTTATAATGATTTACAATAATATATACATCTGCTTTGACATATGAAT  
CAAATCTTTGAGTCAAGTAAAAGCAGCAGATTTTGGGACAAACTGTCCAGTGTTCAGGTACAATGTCTTT  
GTTCTATGTATATTGCTGGGTAAACAGTAAACACAGGTATTGTTACCCAGCAAATATCCTTGAATAAACAAA  
CAGACAGCATATAGACAATACACTCTATGTACAACCTATTTGAGAAACAAATAAGGCTTTCTACAAAGTTAGT  
AAATTGTCTAGTTAGGTTTTGTTTCATGACAAAAGTTTGCACACAATATTGCACAAGTCAGCACCTGGGGTTGG  
GGTTTTGCTAAGAAGTCTAGTATAAAAAGGGAGCCCCCACCATGGGTGAGTGTCTCGCTAGGGCCCCCTCAAC  
GAGTGCCGGGACATTTGGATCATCGCTTGGTTATTGGGAACCTGAAGGTCTTGGACCAAAGGCTGTGGGGCTC  
CCCGATTGGGGTGATTTGTGCAGAACTGGCTGTGCTTGTAACTATAATCATACAAAGATAAGTAAATCTATTT  
AATTCTATTACTTGTGTGCGTGTAAAGTTATTGCTCACTAACAGTCTATCAGAAGGCTTAATCATTGATCC  
TGCATATGTATTAATATTTGTCATTAATGTCAATTAATACAAATTATTAATATTAATAAAGGTTTCAACCCCTT  
TATTACATTTGGCGTAGTCGGCAGGATTAACCCCTTTGATGCTGGGAAGTGTAGTAATAACTTGTAAAGAAAT  
TATAGAATTTATAGTGCAGCTTTGTATGGTAGTGTAGTGGCTTGTGCAGGGCAAACATACTGTTGAAAGTTAG  
CAATAATGTTCTGTTGGCTGAAAAACAAAGTTAGAGGGGTAGATGATCAAACGAGCAACCTTCCCACATGGGC  
TAGTTCGGGACCCTGGACCCATGTTGCTCGGGATGTGATAGAAAATCAGTAGAGATGTAGCGAACCTCACAAA  
AAAAGTTCGCGAACCCGTTTCGCGAACTTCCGCCAAAAAGTGCGAACCTTTGCGAACCTTTCGGAACCCCATAGA  
CTTCAATGGGAAGGCGAACTTTAAAACCTAGAAAAGCCATTTCTGGCCAGAAAACCTGATTTTAAAGTTGTTTA  
AAGGGTGTACAGACCTGGGCAGTGTATGCAGGAGGGGGATCAAGGGCAAAAATTTCTCTGAAAAATACGTTG  
TTGACACAGCGTTGCGTTTTGTGCTGTAAAGGGCAGAAATCACACTACATTCCTAAACTTGTGTAATAAACTG  
CTTTAAAACGTCCGGCGCCTACATGCCAATCAAGTGTGTAAGGTTACGGCCGGTTCACCGCAAAGACAAA  
ACGCCGCAGTAGTGGATACGGAATATATTATTGCTGGTGGAAAACATCGCTCAGGTGATTTTATTGCAATGC  
AATGTCACTACTATAATGTTATTTTCAATTAATGTTTGGTGCAGGAAACAAATTTACACGGGGGCAACAAAGAC

AATGAATTTTAGGAAGGCAAATTTTAGCTCCTTAAGGGCAGCGCTTCAGGGCATAGATTGGGGCATTATGTTT  
TCTGATAAAAATACAGAGCAGAAATGGTTGTCATTTAAAATGATATTAATCATTACTGTTCTCAATTCATTC  
CATTAAATAAGAAAAAGTAGAAGTGTAAAGAATCACCCATGAGGGCTTAACTCTGAGGGAAAAGAAGTTAATAGG  
GAGAAAAAGGAAAGCTTTTAAGAAATATAAGTCAGAGGGGACAGTAGCTGCGTTTAAATGAATATAAACACTAT  
ACAAGTGTGTAAAACAGCAATCCGGAAGGCAAAGATAGAAAATGAGGAGCGCATCGCGGCCGAGGCCAAGAC  
TAACCCCAAAAAGTTTTTAAGTATATTAATAGTAAAAAGATGCAGGTTGAGGGTGTGGCCCCATTGAGTTAT  
AATAACAATATGGTTACAGCGGATACAGAAAAGGCAGATGTGCTTAACCAGTTCTTTTCTTCTGTGTATACAG  
TAGGGGGAGCCAGAGGGCCAAGTCCCACCCAATAGCTGCACTGTTGCCTCAGCTCCAACACTACACAGTGGTTGG  
CACAGGATATGGTGTCTTAAAGGGTTACACACGATAAATGTAAACAAGGCACCTGGGCCAGATGGAATACACCC  
TCGGTACTGAGAGAGCTAGGGGCAGAATTGCAGTGGCCCTTGTCTGATATTCTCAGACTCTCTTTTCATCA  
GGTATGGTACCTAGGGATTGGAAGAAGGCAGTGTGATTTCCCATATTTAAAAGGGGAGTAAGATCTCAGCCTG  
GCAATTATAGGCCTGTAAGTCTGACATCCGTGGTGGGCAAGTTATTTGAAGGCTTGTAAAGGGATCACATTCA  
AAATTATGTAGTGGAGAATGCCATTATGAGCAGTAATCAGCATGGCTTTATGAAGGACAGGTCATGTCAGACC  
AATTTAATTGCTTTTTATGATGAGGTAAGTAAGAAGCTGGACAGTGGGGATGCAGTAGATATCATCTATTTGG  
ATTTTGCAGAAAGCATTGTGATACCGTTCCCCACAAACGACTGCTTTCTAAGCTAAGGCTATTTGGTCTTAGTGA  
AGCCGTTTGCACATGGATAGAAAACCTGGCTACAGGATCGGGTACAGAGGGTGGTTGTTAATGGTACATTCTCT  
ACTTGGAAATAAGGTCCTCAGTGGGGTCCCTCAGGGTTCTGTACTGAGTCCACTTTTGTTTAATTTGTTCAATA  
ATGACTTAGGGGAGGGTATTATGAGTAATGTATCAGTGTGTCAGATGACACAAAACCTCTGCAGACCAGTCAA  
TTCTATCCAGGATGTGACATCCCTGCAGCAGGATCTTGGCCAACCTGGCAATCTGGGCAGCTAAGTGGCAGATG  
AGATTTAATGTGGATAAATGTAAGGTCATGCACCTGGGATGTAAAATATGCAAGCCCCGTATACCCTTAATG  
GGACTGCACTAGGCAAATCCCTAATGGAGAAGGACCTTGGAGTCTTGTAGATAATAAACTTGGCTGTAGCAA  
GCAATCCCAGGCAGCAGCTGCAAGGGCAAACAAGTTTTGAGCTGTATTAAGGGGGTATAGATTCACGGGAG  
GAGGGGGTTATTTCCCTTTACAGAGCGCTGGTAAGGCCCATCTAGAATATGCTGTTTCAAGTTTTGGTCTC  
CAGTGTCAAACGGGACATTACTGAGTTAGAGAGGGTCCAGAGAAGGGCAACTAAGCTGGTAAAGGGTATGGA  
AAGTCTCAGTTATGGGGAAAGACTGGCCAGTTGGGTCTGTTTACACTGGAGAAGAGGCGTTAAGAGGTGAC  
ATGATAACTATGTATAAATATATAAAGGGATCATATAAATACCTTTCTAATGTTTTATTTACCAGTAGGTCTC  
TCCAACGGACACGAGGGCACCCACTCCGTTTGAAGAAGGGAGGTTCCATTTAAACATTCGGAAAGGATTTTT  
TACAGTGAGAGCTGTGAGGTTCTGGGGTCCCTCCCCGAATCAGTCGTGCTGGCTGATACATTATATAACTTT  
ATATAGGGGCTGGATGGATTCTTAGCAAGTGAGGGAATACAGGGGTTATGGGAGATAGCTCTCAGTACAAGTT  
GATCCAGGGACTGGTCCGATTGCCATCTTGGAGTCAGGAAGGAATTTTTTCCCTCTGTGGCAAATTAGAGAG  
GCTTCAGATGGGGTTTTTTGCCTTCTCTGGATCAACTAGTAGTTAGGCAGGTTATATATAGGCATTATGGTT  
GAACCTGATGGACGTATGTCTTTTTTCAACCAACTTACTATGTTACTATGTTACTATGTTACTATGTGTAAT  
GTGTTTGGGGCACTACTATAAATAACAGCAAACAGCACTGGACACGTTAAAGAACAGTTTAAATTAATAAATA  
ATAAATAAATAAATAAATAAATAAATAAATAAATAAATAAATAAATAAATAAATAAATAAATAAATAAATAAATA  
TCCCCACAGCTAGACTAATAGCACTCAGCTCTATAAATTACAGTAGCAAAGTAAAAAACACAAATAAATAA  
AAATTATGTGAATGTGTGGTTGGTGTCTAGTGCCTACTATGAGCAGCACACCTGTCTCCAACACACACAGAC  
GGAGCTGCAGTACACAATGAAAAGAACAAGTAAAGTAAATCAGAAAATAAAGCAGTCTTACAAGGAC  
TATTGGGTTACAGCAGATGAGATCAGCAGGACAGCTGTCCCAGCAGCTACATACAGAGCAGTAGAAAGTAGA  
TTACTAGTCAGCAAAGCTACCTAAACTGTCCCTCAAACCCCTGCACAGCTCTCTCCCTATGCTAACTCATCAA  
GCACACACAGGCAGAATGTAAAATGGCTGTGGGCTTCGGTTTATATATGGAAGGGAGTGGTCCGGGGGTGGT  
CCAGGAGGGAGAGCTGCCTGATTGGCTGCCATGTATCTGCTGGCTCTGGGGTGGAGAGTCAAATTTGGCTCC  
AGCTAAGGCGAACCCAAAATGCGAACTTCACTAAAAGTTCGCGAACTTGCAAACCTTGCGAACACCCGATTTT  
CGTGCGAATTAGTTCTCCAGCGAACAGTTCCGTACATCTCTAGAAATCAGCAACTCTCTCAGGTGACTCACCC  
CGATCACCTGTTGCTGAATTTGGATTTGTCTATGTGTTCCAAGGAGCTGAAGTCTCAGCACAAATTTGGTTGG  
TTGTGTTTTTCAGGCGCTTAGGGAGGAGGCAGTCCAAAGGGAGGCAGTTGAGCTTGAGCTGCAGGCAGTTAAAG  
ATCAACTAGCCACAATGAGAGAATGTTTGCCTCCTCATTAGCACACAATGAAAAGTTGGAGATAGAATTTAC  
AAAATATGTGGTAAAAACTATGAGTAACAATCACCATAGAAAAGAGACAGAACAAGAAGAAAATGGTGCATTA  
GTTAGAATAAGAGCTCTTATAAGTAAAGGAGACTGGGGGGAGACTGGTCAGGAGCACATGAGGAAGTTCAAGA  
AGACATGATAAGACCTATGTTGACTACAAGACAAGTCTGTCAAAGTGCAGATTTTGTGACAGATCTTCAGGA  
AATACAGAAGCAGCAGATCAACAGTACACTGAGCAACCAAGTTTATCTGCTGCAGTAGTTAAGTTGGGTGAGC  
TAATTTCCAGTTAGGAGGAGAAAGTGGTGTGCTTACAGATCCATTAACCTCAGTACTCCCAAACCCACATAC  
AGTAAAAGAAGAATGGGAAAGGCCAGACAAAGTTCCATTTACTGCACATATGAAGAATACATTTGCTAGTAGGA  
TCTCCCACCCATTTAAAAGCCCCATTGTTACATAAACTGAAATATTGTTGGGCAGATTAGAATGTGGAGAGG  
AAAACATTCCTAGGCAAAGGGTAGTAAAAGTCTGGGGTACAAAAGGTTAAAAACATTTGAAGGCAGATGCT



TTTAGATTTGCTTCAATATGGTGTACCAAAGCCTGAAATTGATGGTATTCCCTAACACTGATTTGTTGAAGCGC  
TGGAaaaaactGAGACAAAAGGTGAGGTTGAAATTACCACAACCACAGAATGTGGCAACCTGTAATGTAGAGG  
ACCTATCTTCCCTTTTAGCCCATACATAGAAAAGGAAATGGCTAAACATAAGGGGAACATCTAGGAGGTTATA  
TGAGAGGATAACTAGTGATAGTTTAGGAAAAATACAGAAGCAAAACAATGTTGAGAATGGTACAATTCTACTG  
GTTTAGTAATAGAACAGCTGTATATCGTAAAAGGTGTTTCTCTTTGTATGTAAAGAATGCTGCCCCCTCCCT  
TTATACACAGACTAGTTCACCTGAGGGAGTGATTTATTGCTCAAGATAGAGAAAACAAAATACATTTTACATTG  
TGTTAAATTGTACTGTATGTTAATGTCATTTGTTTTCTGTTTCAGGATTTAAGAATCTGATTATTTTGAGTT  
AATATGGTTTTTAATTACAGACATTAAGAGTTGATGGATCCATTATTTTTGACAAAATTTTTGTTCTGTTTTTA  
GATTTCTGTGTAAAGGCCTTAAGACATGTCTGTTTTTTTTGTTAAAAAGTTTTTAAAGAACTGTGGTACTACA  
AATAAGAATGAAACTGGAAACACTTTGGGCCTGATTCATAAAGTGCATAAAAATTTATCGCATGTTTTGCGT  
TAAATTAGTCGCGATAATTAGCGCTCGATTACCATAAGTATTATCGCGTGCCTTAACTCGCCATATCGCATGC  
GTTAATTTCCGCGCTGAAAAGAATACAATCGCATGATTCACAAACACTTAGGCGCACTAAATATCGCATTGGT  
CTATGCAAAAATTAACCCATACTACAGGCAGGTGATAAATCTAGAAAAGTGCAGTAAATGAGTTTTTGGCAA  
TAAAATATGGACTTACAGTGTATTTTATTAGTCTGTGCTTTTTTACTCAATTTTACTAAAGTCTTGGGATGT  
ATGGAATTTCCCTACTAATATACAGTACTATAGTGGTAAATATTTAGTCGCCATAATATACAGTACTATAGCG  
GTGAATATTTAGTCGCCATAATATACAGTACTGTAGCGGTGAATATTTAGTCGCCATAATATACAGTACTGTA  
GCGGTGAATATGTTGTCGCCAAAATATACAGTACTATAGCGGTAAATATTTAGTCGCACAAAATACATTACTA  
GGTATAATAATTATAGAAAAGTACAGTAAATGAGCTTTTGCCAATAAAAATATGGACTTTGCAGTGTATTTAT  
TCAGTCTGTGTTTTCCCCAGAGTGACGCAGCCGCCAGTTTGCAGCGAAATGGGCATTTTTAATACAGTAATTT  
TCTGCAAGTATTGGCGTGTATGGCTAACATGGCGTGCCTTATTTCGCGCGACTATTTATATGCAGCTACAAGT  
GATGAAATGTTTCGCCAGGCATGGATTTCGCAGCAAATTTTGGACGTACAGCAAATTTTCCGCGGCGAATTT  
TTTCATGCGTTTTCGCAAAACAATCTGCCAATGGCAAAACGCATAAAAAAATTTGCCACTCAAAAATTCACCGC  
ACGTCCAAAATTTACACAGGCGTCAAAAATAATAGTTGCGGGCAACAATTTTTTTGCCCGCACAAACATTTT  
TGCCGTTTTGTGGATCTTTCGAAAGATTTGCTAATTTTTTCATAAAAGATAACCAGAACACATTCCTCATCAC  
TAGTGGCTACTATTTATATGTGGCTAATATTTATATACACTATTTATATGCGGGCACAATTTATATACACTAT  
TTAAAGCTACCATTTATATCCGGCGACTAACCGCGAGAGTTATTTAGCGCATGTACCGGCAAATACCGCATTT  
AAATTGTCTTCGCGAGTTAAATAACGCATGCAATATCGCGCGTAAAATAGCGCAAGTATGCTTATAGTGAATC  
GTGCGAAAAGTCGCGAAAATTAATACGCAATAAAAATTTTTACCGCATGCTAAACAGATCTTAAATGCTAATTT  
TTATCAAGTGCATTAACAAATGGGTAAATAGCAAAAACAATGGACAGCAAAACAAGGATTTGGACATTGTTAATC  
TTCAATGGACATCAGTACAAAATATTGAAGAACCTGGAATTCATTTGAATGGTACCTGGAACCTTAAATGGA  
CATTGGTTTTGGACTTTATAAATGAATATTTATGTTTTGTTCAATTTGTTTCTACCGGCTGAAATTAGCATTGC  
ATACACTATTGTACTAATGGTAATAGGAATGTTATGGCTTGTACATGAACTGTAAAAGTGTAGTTAGTGGAT  
TTTAGAGCACAGGCAGCACAGCTGAACTGTATACCTCCAATGGTATATAATATTGTGCAGTGAACCTGCAGTA  
TAGAGAAGACCCTGGCTGACAATCTGTAGATTCTGGCAAAATACCAGAGGGGCTGCTGTAAGATGCCATAGACA  
CTCACTATTTATTGGGCTGGTGAAGGATGTTTGGGGCTCTGTGTACTTGAAATGCCAGGGCCTATTTTGAAC  
TTATCCCTTATGAAGTCACTATGAAATTTCTTTGATAAAAAAGAAAGATAGTGAATTTATTATCCTGAGGG  
AAAAATTGTATGTGAAACTAGAAAGGGAAGTTTGAAGCAAACTTCATGTTGGGTTGAAAAACATGAAGTCAC  
TGAATGGGCTCCGCCACTTTCTCTGACCATGGACCACAGTTATATAGTAAAAACCCTGTGCAAAGTTTGGG  
GACCCTGGTTTTTAATAGTGTCTGCATGGCAGCAACTTAAATTTCCCCACTGAAAAGTCAACGACATCTGATTGG  
TGGTTGGTGGCTCCACCCCTTTTTCTAACCTGGAAGTGCAGTTACCCAGTGACTAACTCTGCGAAGTTTAGG  
GACCCTAGGATTAATAGTTAAAGAACGGCAGCAATTACCCAATAAAAGTCAATAGGTGAATTTGTGATTGGTG  
GTTCCGCCACTTTTTCTAACCTTGAGTAGAAGTCAACCCAGTGACAAACAGTGGGCACCCTGGCATAAATAGT  
TTGAGAATGACAGCATTTTAAATTTAAACCAATAAAAATTCATGGTTGAAATCTGATTGGCTGTTAGTGGCCC  
AACCTTCTTTTCTATTTTTGAACTGCAGTCCCCAGTGACCAACATTGCAAATTTTGGGGACTCAGGCATTC  
ATTGTGAGGCTGAGAGCATTTTACACTTCACCATTTAAAAGTAAATAGGTGAAATGTTATTTGGCTGTTGGTGGC  
TCCACCCACTTTTTTCTAACCTTGAATGGAAAATACCCAGTGACTAACTCTGGAAAATTTAACAACCCTGGA  
ATTAATATTTAAATAATGGCATCAGTTTAAATATAAAACCAAGGAAATCTAATGGGTGGAAATGGATTGGCCGT  
TGGTGGCTCCTCCCACTGTTTGGGAACCCTGATATAAATAGTGTGAGCAAAGCAACATTTTAAATATAAACC  
AAAAAATTTAATAGGTGAAGTCTGATTGGCTGTTGGTGGCTCCACCCACGTTTTTAAAACCTAAAAATGCAGT  
TCCCTAGTGACCCTGGTGTAAACTGTGAGAATGGCAGCAGGTTGAATTTCCCATTTGAAAATCAATAGGTAA  
AATCTGATTGGCTGTTGTTGGCTCCACCCACTTTTTCTAACTCTGAACTGCATTTACCAGGTGACTAGCTCTG  
CAAATTTTGGAGACCTTAGTATTAATATTTAAAGAATGGCTGCAGTTTAAATTTAAACATATGAAGTCTATAG  
GTGAAATCTAATTTGGTGTGTTGGCTCCACCCACTTTTTCTAACTTGAACATAGTCACTAGTGACAAACT  
GTGCAAAGTTTGGGGACCCTGACATTAACATGTGAGAATGGCAACAGTTAAAATTTCCCACTGAAAACAAT

GAAAGAAATGTGATTGGCTTTTAGTGGCCCTGCCCACTTTTTCTAACCTTGGGTACAAAAGTCACGCAGTGACT  
GACTGTGCAAAGTTTGGGAACCTCTGGCATCAAGCCAATAAAAATTTAATGGGTGAAATCTGATTGGCTGTTGGT  
GGCCCCGCCCACTTTTTCCAAAACATAAACTGTAGTCCTCTAGTGACCAACTGTGAAAAGTTTGGGGACCCTG  
GTGTTAATACTGTGAGAATGGCAGCAGGTTGAATTTCCCATTAGAGTCAATAGGTAAAATCTGATTGGCTG  
TTGGTGGCTCCACCCACTTACAAAATACAAAAAACTTAAATGCGTAGTCACCCAGTGTCTGACTATGCAA  
GTTTGGGAAGCCTGGCAACAAACCAATAAAAATCAATAGGTGAAATCTGATTGGTTGTTGGTGGCTCCGCCCA  
CTTTTCAAACATAAAATGCAGTCCCCTAGTGACCAACTGTGAAAAGTTTGGGGACCCTGGTGTAGTACTGT  
GAGAATGGCAGCAGGTTGGATTTCCCATTGAAAGTCAATAGGTAAACTCTGATTGGCTGTTGGTGGCTCCGC  
CCACTTTTTCTTACCTTGAATGCGTAGTCATCCAGTACTGACTGTGCAAATTTTGGAAAATCTGGCATCAAA  
CCAATAAAAATCAATAGGTGAAATCTAATTGGTTGTTGTTGGCCCCACCCTTTTTCTAAACTTGGAACATAG  
TCACCTAGTGACATACTGTGCAAAGTTTGGGGACCCTGACATTAACATGTGAGAATGGCAGCAGTTAAAATT  
TCCCCTGAAAACAATGAAAGAAATATGATTGGCTTTTGGTGGCCCCGCTACTTTTTCTAACCTTGAGTAC  
AAAGTCACGCAGGGACTGACTGTGCAAAGTTTGGGAAGCCTGGCATCAAACCAATAAAAATCAATAGGTGAAA  
TCTGATTGGTTGTTGGTGGCTCCGCCCACTTTTTCAAACATAAAATGCAGTCCCCTAATGACCAACTGTGAAA  
AGTTTAGGGACCCTGGTGTAAATCTGTGAGAATGGCAGCAGATTGAATTTCCCATTGAAAGTCAAAGGTA  
AACTCTGATTGGCTGTTGGTGGCTTCGCCCACTTTTTCTTACCTTGAACCACAGTTACCTGGTGCCTAACCCCT  
GTAAAGTCTGGGGTCCCCGGTGTATTACTGTGAGACTGGCAGCAGGTTGGATTTCTGCCAAGTTAATAGGTA  
AAATCTGATTGGCTGTTACATCTCCGCCCACTTTTTGGGCATCCAACAATCATCATATTTTCATTGAGGCTGA  
ACCCATGACTGTGTGATTCAAGTTTGGGGGTGTGGCCTCAAAGCTGTAAGTTTGGCAGCAGTTTCAATTTCCC  
CATAAAAGTCAAAGGTACAATATGATTGGCTGCTGTTGGCCCCCTCCCACTTTGTGGGGTTTTTTTTAAAAAAA  
AAAAAACCTGAATGTGTAGTCACCCAGTACTGACTGTGCAAAGTTTGGAAAATCTGGCATCAAACCAATAA  
AAATCAATAGGTGAAATCTGATTGGCTGTTGGTGGCTCCGCCCACTTTTTCAAACCTTAAACTGCAGTCCCCTA  
GTGACCAAGTGTAAAAAGTTTGGGGACCCCGACGTTATTACTGTGAGACTGGCAGCAGGTTGGATTTTCGCCA  
AATCAATAGGTAAAATCTGATTGGCTGTTTGGGCATCCAATAATCATCTATTTTTCAATTCAGGCTGACCCCAT  
GACTGTGTGATTCAAGTTTGGGGAGTGAAGCCTCAAAGCTGTAAGATTGGCAGCAGTTTCAATTTCCCATT  
AAGTCAATGATTAAAATTTGATTGGCTGTTGTTGGCCCCCTCCCACTTTGGGGTTCATCCAACAAATGTTGCTGC  
TTCATTGGGGTGACCCATTATTATATTCAAGTTTGGGGGTGTAGCTTCAAAGCTGTAAGTGTAGCAG  
CAGTTTGGAAAATCTTCCCTGTCAAAGTCAATGGGAAAATTTGGGGGGTTTCGGAGCGGCCACAAAAGACGGG  
GGCCGGATCGCTTAGAAAAGCACAAGCAACCTGCTCTGCTATAGGGCGAAGATGTGTGGGGAGTTTGGGTGT  
TGTACCCCTAAAACCTGTAGGAGGAGTGGCATTAGAAAATGGGGGGCACTAAGAAGAAGAAGAAGAAGAA  
GCGGAAGAATAAGCCAAAGTCGAAGAACAGTCTGTGGGGTTTTCAACCAACACAACATAACATGTCAGTAGC  
ATTATTGTATAAGTAATTATTATAAGTGTGAAGAGGGTTCATGTCATGTCATTTTTGTGAGTTAGTACTGTGATG  
TCAATGGGGTTGGCTGAAAAGAGATTTTGGACAACCTCTATATAACTGAAGCAAAAAGCCTTTAAAAAACTGCAA  
ATAATACACAATTTCTGTTGAGGGACACGGTTGTTTATAAGAAGTCACTGTTAGACTTGATAGTATCATCCCAA  
GTGATTTGAATGCCCTGGCTGATTTGTGGCCTTATGGGTGGAATTTGTGGCTACTAGTGATAGACATATTTTG  
GAAAAGCATTGGCAGAATGTGTACTGAGACTAAAACCTCTGCTAAAAGGAATTCAGTTGCCATTTGGTCTATAA  
GAGGGGGTTAGGTAGAAAACAAGTGCATGGCAGATACATAATATAGTAAACATATTGCTTATCAAAGAAGCA  
CTGTTTAACTATGTGAGCTGTAAAGCCTGCAATGAAACCTGCCCTTGGCCTAATGTTTTGAGCAGCTGATGG  
TCTGTAATGAAAGTGCAGAGCAAGAGGGATTCCCTATACATGTTTGGCCAAGATATATATCTATAAGTAGACAC  
AGATTTTCTCACTGGACAGAAATCATTATAGAGGTGTTTATGACTTGGGATATAGTTGAGATTTGTTTATTG  
TTTTATTAAATGTCATTAATGTTTATTTGTTTAGGGCAGGGGTGAGAACCTTTTTGGCCGAGTGAGCCATA  
AACACCACATATTTTAAAAATGTAATCCCGTGAGAGCCATACAATATGTTTGGCCACAGATGCTGCGGGGCAAG  
GTAGGGTGGGTCCCAAGGATGCCGGATGTGATGCAGAGGAGGGCGTGGCCTGTGCTCGGCCAATAGAAGACGT  
GTTCTAAGGCTTAGAACACGTCTTCTATCCGCCAAGTGCAGGGGCAAGGTAGGGTGGGTGCCAAGGATACCGG  
ATGCCGATGTGATGTGGAGGAGAGCTTGGCCTGCGCTCAGCGGATAGAAGACGTGTTCAAGAGCTTAGAACAC  
GTCTTAGAACGTCTTAGAACACGTCTCTATCCCAAGAGCAGGCCACGCCCCCGTTATTTTTTTTTATTAA  
AGATTTGGCAGCGAGCCAGATGCAGCCATCAAAGAGCCACATTTGGCTCCCGAGCCATAGGTTCCCTACCCC  
TGGTTTAGGGTAATGGGGACAACAGTGAATGCATATATGTCATTGAATGCAGCATTGTATGTTATCTGTATT  
AGAGGACTTACCAATTTGTATACTGTTGGTTATTATTATCAAATCAGTATATTTTGTAAATCAAGGGGTGGAA  
TGTAGCACGGTGGATTTTATTTTGATTTTGTAAATGATTAACAATAATATATGCATCTGCTTTGACATATGAAT  
CAAATCTTAGGTTTGTAGTCCAGTGTCAAGGTACAATGTCCTTGTCTATGTATATTGTTGTGTAACAGTAA  
ACACAGGTATTGTTACCCAGCAAATAACCTTGGAAATAAACAAACAGACAGCATATAGACAATACACTCTATGT  
ACAACCTATTTTCAGAAAACAATAAGGCTTTCTACAAAAGTCTAGTTAATAGGTTTGTTCATGACAAAAGTTTA  
TACACAATATTGCACAAGTCAGCACTTGGTGTGGGGTTTGGCTAAGAACTCTAGTATAAAAAGGGGCCCCCAC

CCTGTGTCAGTAGCTTCGCCTAGGACTCCTGAACGAGTGCCGGGACATTTGGATCATCGCTTGGTTATCGGGA  
ACCTGAAGGTCTTGCACCAAAGGTTGTGGGGCTCCCCGATTGGGCTGAATTGATGCAGAACTGGCTGTGCTTG  
TAACTAATCATACAAAGATAAATAAATCTATTTGATTCTATTATTACTTGTGTGAGTGTAAAGTTATTGCTCAC  
TAACAGTCTATCAGAAGGCTTAATCGTTGATCCTGCATGTTTATTAATATTTGTCATTAATGTCAATTATTAC  
AAATTATTAATATTAATAAAGGTTTCATCCCCCTTTATTACA

>Xt-S21\_CM004451.2:754654-762085 *Xenopus tropicalis* strain Nigerian  
chromosome 9, whole genome shotgun sequence

TATACATCTGCTTTGATATATGAATTAATCTTAGGTTTGTAGTCAAGTAAAAGCAGCAGATTGTCCAATGTTT  
CAGGTACAATGTGTTTGTCTGTGTATATTGCAGGGTAAACAGTAAACACAGTATTGTTACCCAGCAAATATC  
CTTGAATAAAACAAACAGCAGATAGACAATACACTTATGTACAACCTATTTGAGCAACAAATGGGCCTGCTAC  
AAAGCTTATAAATTGTATAGTTAGATGTTTTGTTCATGACAAAAGTTTGTATACAATATTGCACAATAAGTCA  
GCACTTGGTGTGGGGGGTTTGCTAAGAATTCTGGTATAAAAAGGGGCCCCCACCCTGTGTCAGTAGGTTCCCC  
TGGGGCCCCCTGAACCAGTGCCGGGACATTGGGATCATCGCTTGGTTATCGGGAACCTGAAGGTCTTGCACCAA  
AGGCTGTGGGGCCCCCGATTGGGCTGAATTGTGCAGAACTGGCTGAGCTTGTAACATAATCATAACAGAGATA  
AGTAAATCTATTTGATTCTATTATTACTTGTGTGTGTGTAAGTTATTGCTCACTAACAGTCTATCAGAAGGTT  
TAATCATTGATCCTGCATATGTATTAATATTTGTTATTAATTTCAATTAATACAAATTATTAATATTAGTAAA  
GGTTCACCCTCTTAATTACAGTCCCATAGGGATATTACCAAACCTGTATCATATATATATATAAACACACCC  
CTCATGTATAATGTCCCTGTGCCCTCTATCCCCTCCCCCAGGCTGGGATGTGCCACTCTGTAGGTCAGTGGG  
TGCCAGTGGGTTATTAGGGGGTACTCACCCCTCACATATAATGGTGGCTGTGCCCTCTATCCCCCCCAGGCT  
GGGATGTACCCTCTGTTGGTCCAGTGGGTGCCAGTGGGTTATTAGGGGGTACTCACCCCTCACATATAATGG  
TGCTGTGCCTCTCTATCCCCCCCCCCCCAGGCTGGGATGTGCCACTCTGTAGGTCAGTGGGGTGCCAGTGGGT  
TATTAGGGGTACTCACCCCTCACATATAATGGTGTCTGTGCCTCTCTATCCCCCCCAGGCTGGGATGTGCCACT  
CTGTAGGTCAGTGGGTGCCAGTGGGTTATTAGGGGGTACTCACCCCTCACATATAATGGTACTGTGCCTTCTCT  
ATCCCCCCCAGGCTGGGATGTGCCACTCTGTAGGTCAGTGGGTGCCAGTGGGTTATTAGGGGGTACTCACCC  
TCACATATAATGGTGTCTGTGCCTCTCTATCCCCCCCCCCCCAGGCTGGGATGTACCCTCTGTAGGTCAGTGTG  
GTGCCAGTGGGTTATTAGGGGGTACTCACCCCTCACATATAATGGTGTCTGTGCCTCTCTATCCCCCCCCCAGG  
CTGGGATGTGCCACTCTGTAGGTCAGTGGGTGCCAGTGGGTTATTAGGGGGTACTCACCCCTCACATATAAT  
GGTACTGTGCCTCTCTATCCCCCCCAGGCTGGGATGTGCCACTCTGTAGGTCAGTGGGTGCCAGTGGGTTATT  
AGGGGGTACTTCACCCCTCACATATAATGGTACTGTGCCTCTCTATCCCCCCCCCAGGCTGGGATGTGCCACTC  
TGTAGGTCAGTGGGTGCCAGTGGGTTATTAGGGGGTACTCACCCCTCACATATAATGGTGTCTGTGCCTCTCTA  
TCCCCCCCCCAGGCTGGGATGTGCCACTCTGTAGGTCAGTGGGTGCCAGTGGGTTATTAGGGGGTACTCACCC  
CTCACATATAATGGTGTCTGTGCCTCTCTATCCCCCCCCCAGGCTGGGATGTGCCACTCTGTAGGTCAGTGGG  
GCCAGTGGGTTATTAGGGGGTACTCACCCCTCACATATAATGGTGTCTGTGCCTCTCTATCCCCCCCCCAGGC  
TGGGATGTGCCACTCTGTAGGTCAGTGGGTGCCAGTGGGTTATTAGGGGGTACTCACCCCTCACATATAATGG  
TGCTGTGCCTCTCTATCCCCCCCCCAGGCTGGGATGTGCCACTCTGTAGGTCAGTGGGTGCCAGTGGGTTATT  
AGGGGGTACTCACCCCTCACATATAATGGTGTCTGTGCCTCTCTATCCCCCCCCCAGGCTGGGATGTGCCAC  
TCTGTAGGTCAGTGGGTGCCAGTGGGTTATTAGGGGGTACTCACCCCTCACATATAATGGTGTCTGTGCCTCT  
CTATCCCCCCCCCAGGCTGGGATGTGCCACTCTGTAGGTCAGTGGGTGCCAGTGGGTTATTAGGGGGTACTCAC  
CCCTCACATATAATGGTGTCTGTGCCTCTCTATCCCCCCCCCAGGCTGGGATGTGCCACTCTGTAGGTCAGTGG  
GTGCCAGTGGGTTATTAGGGGGTACTCACCCCTCACATATAATGGTGTCTGTGCCTCTCTATCCCCCCCCCAGG  
CTGGGATGTGCCACTCTGTAGGTCAGTGGGTGCCAGTGGGTTATTAGGGGGTACTCACCCCTCACATATAATG  
TGCTGTGCCTCTCTATCCCCCCCCCAGGCTGGGATGTGCCACTCTGTAGGTCAGTGGGTGCCAGTGGGTTATT  
TAGGGGGTACTCACCCCTCACATATAATGGTGTCTGTGCCTCTTTATCCCCCCCCCAGGCTGGATGTGCCACTCTG  
TAGGTCAGTGGGTGCCAGTGGGTTATTAGGGGGTACTCACCCCTCACATATAATGGTGTCTGTGCCTCTTTATCC  
CCCCCAGGCTGGGATGTGCCACTCTGTAGGTCAGTGGGTGCCAGTGGGTTATTAGGGGGTACTCACCCCTCAC  
ATATAATGGTACTGTGCCTCTCTATCCCCCCCCCAGGCTGGGATGTACCCACTCTGTAGGTCAGTGGGTGCCAGT  
GGGTATTAGGGGGTACTCACCCCTCACATATAATGGTGTCTGTGCCTCTCTATCCCCCCCCCAGGCTGGGATGT  
ACCACTCTGTAGGTCAGTGGGTGCCAGTGGTATTAGGGGGTACTCACCCCTCACATATAATGTACTGTGCCTC  
TCTATCCCCCCCCCAGGCTGGGATGTGCCACTCTGTAGGTCAGTGGGTGCCAGTGGGTTATTAGGGGGTACTCAC  
CCCTCACATATAATGGTGTCTGTGCCTCTCTATCCCCCCCCCAGGCTGGGATGTGCCACTCTGTAGGTCAGTGG  
GTGCCAGTGGGTTATTAGGGGGTACTCACCCCTCACATATAATGGTGTCTGTGCCTCTCTATCCCCCCCCCAGGC  
TGGGATGTACCCTCTGTAGGTCAGTGGGTGCCAGTGGGTTATTAGGGGGTACTCACCCCTCACATATAATGG  
TGCTGTGCCTCTCTATCCCCCCCCCAGGCTGGGATGTGCCACTCTGTAGGTCAGTGGGTGCCAGTGGGTTA

TTAGGGGGTACTCACCCCTCACATATAATGGTGCTGTGCCTCTCTAGCTCCTCCCCAGGCTGGGATGTGCCA  
CTCTGTAGGTCAGTGGGTGCCAGTGGGTTATTAGGGGGTACTCACCCCTCACATATAATGGTGCTGTGCCCT  
CTATCCCCCCCCCAGGCTGGGATGTGCCACTCTGTAGGTCAGTGGGTGCCAGTGGGTTATTAGGGGGTACTC  
ACCCCTCACATATAATGGTACTGTGCCTCTCTATCCCCCCAGGCTGGGATGTGCCACTCTGTAGGTCAGTGG  
GTGCCAGTGGGTTATTAGGGGGTACTCACCCCTCACATATAATGGTGCTGTGCCTCTCTATCCCCCCCCCAG  
GCTGGGATGTGCCACTCTGTAGGTCAGTGGGTGCCAGTGGGTTATTAGGGGGTACTCACCCCTCACATATAAT  
GGTGCTGTGCGCCTCTCTATCCCCCCCCAGGCTGGGATGTGCCACTCTGTAGGTCAGTGGGTGCCAGTGGGTT  
ATTAGGGGGTACTCACCCCTCACATATAATGGTGCTGTGCCCTCTCTATCCCCCTCCCCAGGCTGGGATGTGCC  
ACTCTGTAGGTCAGTGGGTGCCAGTGGGTTATTAGGTGGGACACTATGCCCCAGTAACAGGAGGGGCTCCCA  
GTGTGGGCGGCCATGTTGTGGCACTAACATGCAAATGGTACTTAGTGCCCCAGTTTGCTCATTATGTGCCTGT  
GTGTGAGAGAGCCCCGCCCTCCAGGGCAATTAATATGCAAAGAATCCTCCAATGAGAATCCCAGCTGATTG  
GGCTCAAACACTGTTTTGGGACCTGCTGCATTGTTCCCTCCAGAAACAAGCCCAGATGTTTATAGATGATTATA  
GCTCCCGGATTGTCACAGATTTTTTTTTGGGGGGCACAGTTTTGTTATATTATGCCACTGAATGCCATCTAT  
ACACCATCAATTCTGGTTCTACAATTCTGTATGCAGACAGACAGATAAACCAGTAATGTCCCACCATGACTGT  
ATCTTTCTACAACCAACTTGTCTCTATGCCAGACCAACCTAGCAACACACACATTATAGTGAAGGGACTCA  
CCTGTTATCTGTAAGGCCCCAGTGCCAATCTCTATGGGCTGTGCCAGGCTGGGATGTGCCACTCTGCACACAA  
TTTCTGCCCTTGGTGGGAAAGTATAGATGGGATGAAGTGACATACTCAGTACTGATATATGTGCCACATGG  
GGCCCTTCTGGTTTATTCTCAGCCCTGTAATTCTGTGTGTGGGGAGGAGAGATCGGCTCTTCATGCCAGTC  
TTCTTAGTGCCAGGTAACCTGTCAGGGCATTGGGGAAATAGCCAGAGATATCCCACCGCAATGTCGCCTTTG  
TGCCCTGTGTAAGGGTTGGTATGGGCTGCACCTGGGGGCGCCATGGGAAACCTGCCAATAGGAGGAA  
AGGGAAAGCTTAGAACTGTACATTTCTTTGGGGTTCTGTAGTGATGGGCAGGTCAGCAAATTTACAACCTGCA  
CTTGGGCGCTGCCAGCTTGGACCCACCATCAACCCTGGCACCACCATGACTTTTAACCTCAGTGAACCTCAA  
CGTGGGCATAGAATTTAGGTACATCACCAGAAGGTAGTGAATCTACCTGACTGCCAGGTAACCCATTGACC  
CCATAGGGTTGTGCCGTGTAGTGAAGGAACATATGAATAAGGGATTTCTATGGATTGAAATCTAACACCAA  
AGATACAAAAGACTGAGTCTCCTCCTAATTGCACTTAATCATATCCCAAATATAAATTTATATAGGGACAAATG  
TTCTAATTATAATGATAGAATATGATTGCCTATTAGCACTTCTCATAAGTAACAAATAAAACATCTAATAACA  
GAGGGCTGCAAGGAATTCAAAGCAGCCATGAACATAGCAATTTTTAAACCCACCTTTCAAACCATTTGTTTATCA  
CTGCCAATAATATAGAGATGCTGAAGTGGGGTTACCTGGGTCTCTGGGGCAGATCTCCCTGGATTGAGATGCC  
CCCATGGCCGGGTGGTTCAGGTGACATGGATCTTACAGTCTGGGAGTCCGAGCAGATTTCTCAGGTACCGAAC  
ATGAACTTGTAAACATTAAGGTTTGGTGCAGAATTATTCTGGTACTGAGGTTCTGAGTGTAGGTTTGTGTTGCTG  
TGACCCAGTCAGGCAGGTCCATGTGAGTTCTATGGGTTTGGGATAAAAAGTTCTGCAGGCTGAGGGTACAGAGA  
GCTTCCCCTGTATCAGACAGAGACCATTGCACTGGGATTGGCTGCTTGGGGGCCGCTGGGAGGGGAAAGAAAA  
GAAATGTAGGTTACAGGGCAAATCTCCCCCTTATTATATCAGTGCCACTCACTCACCTCTACTCATATAATA  
ACTCTTATTCATTAATAATATAATTTCTATTTACTGCACATTCACTGATAGGGGGGTATATGTGTGCGTCTCA  
TACCGACATATATAATAAAATAAAGTGCCCCCTATTGTAATAATAGAGATATTATAAGTCACCAAGGAGTT  
CCATGACCATATAAAGGGACGAGGCTGAAGGCCGAGTGCTTTTACACAGGTCATGGAAGTAAGAGTTGACTGC  
TAATATCCTTATATTTTACAATAGGGGGTACTTTACTATACTATTACTATAATATACAAGTTTLAGGGGTGTA  
TTTATTATGCTGTGTAACAAAGCAATTCGCCAAAAAAACGGAGTAAAAAGCTGTGTAATAAATGGAAGATC  
GGTATCTGAACGCCGGATATTACACCGTTATTTTCAATAAGTTCCGGTGGAAGAAAAACGTGTACAAAAATT  
ACGCCGATTTTACGCCGTTTACATGGAAAAGCCTGGCGATGTGTGGCGAATTTTCTCGCCGTTTTTGACAC  
AGCATAATAAATATGTCCCTTAGTGAGTCATGTGACAGAAATGACATCACTAAGCTCCGATTATAACTGATGA  
CATCACTACTCACAGTTTATAATTTACGGTTTTGGTCCCCTGATAGTGGATTTTCTATTGATTTTATCATT  
TTTAGCAAATTATTAGCAAAATTCCTGGTGAGAGGTGTAAGAAGCTTATTGGTGGTTATAGGAAGCGACTGAT  
TTCAGTTATTTTTTCAAAGGGGGTGCAACCAATATTAAGGTAAGGGGGCCAGTAATTCGTCCGCCCAT  
TTTTGGAGTTCTGTGTGACATTAATGTCCAATTTGCTTTTTTCTCCTCCTATTTTGTCTGTCCAATACCCACA  
AAGGGAATAAACACGTGTATAGCAAACATGCGTTACTGCAATACTTTTCTGTGAGAAAATACTTGATTTTCTG  
GAAAAATTTCTGGGGTGCCAACAATTTGGGCCATGACTGTATACATCTGCTTTGATATATGAATTAATCTTA  
GGTTTGAGTCAAGTAAAAGCAGCAGATTGTCCAATGTCCAGGTACAATGTGTTTGTCTGTGTATATTGCAG  
GGTAAACAGTAAACACAGTATTGTTACCCAGCAAATATCCTTGAATAAAACAAACAGCAGATAGACAATACAC  
TTATGTACAACCTTATTTGAGCAACAAATGGGCCTGCTACAAAGCTTATAAATTGTATAGTTAGATGTTTGT  
CATGACAAAAGTTTGTATACAATATTGCACAATAAGTCAGCACTTGGTGTGGGGGGTTGCTAAGAATTCTG  
GTATAAAAGGGGCCCCCACCCTGTGTGCTCAGTAGGTTCCCTGGGGCCCCCTGAACCAGTGCCGGGACATTGGGAT  
CATCGCTTGGTTATCGGGAACCTGAAGGTCTTGCACAAAGGCTGTGGGGCCCCCGATTGGGCTGAATTGTGC  
AGAAGTGGCTGAGCTTGAACATAATCATAACAGAGATAAGTAAATCTATTTGATTCTATTACTTGTGTG

TGTGTAAGTTATTGCTCACTAACAGTCTATCAGAAGGTTTAATCATTGATCCTGCATATTTATTAATATTTGT  
TATTAATTTCAATTAATAACAAATTATTAATATTAGTAAAGGTTACCCCTCTTAATTACA

>Xt-S22\_CM004444.2:119481285-119488999 *Xenopus tropicalis* strain Nigerian  
chromosome 2, whole genome shotgun sequence

TGTAGCACGGTGGATTTTCTATTGATTTTATAATGATTTACAATATATACATCTGCTTTGACATATGAATCAA  
ATCTTAGGTTTGGAGTCAAGTAAAAGCAGCAGATTTTGTGACAGCTATTGTCCAGTGTCAATGTACAATGTCT  
TTGTTCTATTTATATTGCTGGGTAAACAGTAAACACAGGTATTGTTACCCAGCATGTAACCTATTTGAGAAAC  
AAATAAGGTCTGCTACAAAGCTAATAAATTGTATAGTTAGATCTTTTGTTCATGACAAAAATTTGCACATAAT  
ATTGCACAAGTCAGAACTTGGTGTGGGGGTTTTGCTAAGAACTCTGGTATAAAAAGGGAGCCTCCACCATGTG  
TCAGCAGCTTCGCCTAGGACTCCTGAACGAGTGCCAGGACATTTGGATCATCGCTTGGTTATTGGGAACCTGA  
AGGTCTTGCACCAAAGGTTGTGGGGCTCCCCGATTGTGCTGCATTGATGCAGAAGTGGCTATGCTTGTAACCTA  
TAATCATACTAAGATAACCGTATATACTCGAGTATAAGCCGATCTGAATATAAGCTGAGGTCCCTAATTTTACC  
TAAAAAACTGGAAAACTTATTGACTCAAGTATAAGCCTAGGGTGGGAAATGTAGCCTCTACTGCTAAGTTT  
CAATAATCAAATAAATAATAAAAAGGACACTCAGCATGACCCCTGTGAACCTTTCATAAATATATCATGTTGG  
CAGCTGCAGATTAGGGAATCTAATTATCAAGTACTTGCCATGCTGCTGTGTGCACCCCCCTGTGTGCGCTCCA  
ATCGGATCATTGGTGTCTTAATCATATGCAGTGTGCAATCCCTTCATGTTTGTGCTGTGTGCGCATCCAATC  
GCATAGTTGTGCCATTATTTTGTACCATTTGTCAACCTACTTTTCCACATTAGCACCCCTGTGCCACATCTC  
TGGCAGTATTACGGGGGTATGTAATAACACATTTATGTGACCACAAATTTGTTGTAATTTGATAGTTAAGTGA  
TAGTTGCCACCAATGACCCCCCTTGAAGAATTAAGGGTAAACAGCATGGGCCAGCTATTTGCTAGGATTAG  
GTGCTGGGTGCAGGTATTAGCACCTGGGTGCAGTTTCAAGTAAATAGCCCATATCAGGAACGCACCTAATTACT  
TAGCAAACTGCACGCACCCCCCCCCCGTGCCCGTGGACGTGCGTGCATCTTCTTTCTACCCCC  
CCTACCCTTATACCCCCATGTGTCACTGACATAAACTGATCAGGGAATATAAATGTTCCCGTACCCCCAGCC  
TGATAGTTTGGTTCCCCCACAATAAGGTAAGCGCAGCGGCCCGCCATTACTATAAGGGAGAGATTACCATT  
GCTGCCTGTCAATGAGAGATGCACTAATGCTGATGGGTCTATCTCTCTCTGTCTCTCTCTGCCGACTGTCT  
AGGTGGCTGTGGGTGCCGGATTGGGCCGCTCCCTGTGTACCCAGCAAATCCCCCACCCTGGACGTGC  
GTGCATGGACAGACGTCCAGGAGGGGGGTTGCAATCAAGGAATATGAATGCCAGCAAGGTACATCCATATAC  
TCGAGTATAAGCCAAGGCTTACTTTTTTTCAGCACATTTTTTGGTGTAAAAAACTCGGCTTATACTCGAGTATGT  
ACGGTAAGTAAATCTATTTAATTCTATTATTATTTGTGTGCGTGTAAAGTTATTGCTCACTAACAGTCTATCAG  
AAGGTTTAATCATTGATCCTGCATATGTATTAATATTTGTCAATTAATGTCAATTAATAACAAATTATTATTATT  
AATAAAGGTTACCCCCCTTATTACATTTGGCGTAGTTGGCAGGATTAACCCCTTTGGAAGCTGGGAAGTGCAG  
TAATAACTTGTAAAGAAATTTGTAGAATTTATAGCGCAGCTTTGTATGGTAGTGTAGTGGCAGTATTGTAGTGG  
CTTGTGCAGGGCAAACATACTGTTGAAAGTTAGCAATAATGTTCTGTTGGTTGAAAAACAAAGTTAGAGGGGT  
AGATGATCAAACGAGCAACCTTCCCACGTAGGCTAGTTCCGGACCCACGTTGCTCGGGATATGATTGGAGAT  
CAGCAACTCTCTCAGGTGACTCACCCCAATCACCTATTGCTGAATTTGGAATTGTCTATGTGTTCCAAGGAGC  
AGAGGTCCTAAGCACAAATGGGTTTGTGTGTTTTTTCAGGCGCTCAGGGAGGAGACAATCCAAAAGGAGGCAGT  
TGAGCTTGAGCTGCAGGCAGTTAAAGATCAGCTAGCCACAATGAGAGAATGTTTGGGCTCCTCATTAGCACAC  
AATGAGGAGATAGAGACAGAAATTTACAAAAATATGTGGTAAGAACTATGAGTAAAAAGCACCATAGAAAAGGG  
ACAGAACAAAAGGAAATGGTGTATTAGTTAGATTAAGAGCTCTTGTAAAGTAAAAGAGACTGAGGGAGTGATT  
TATTTCTCAAGAAACAAAATAAATGTTACTGTACGGTCAGTATCCCAAACTCAGAACAGTTCCCAAGGGCC  
TGGTCTCGGCTCACGCTTCTGCCTATAACCGCCGCTTTTACGTCGGGAGGAGCCCTTCGCTACTCGGATGCC  
GCCAGGTCTTATAGTGAGGAGCCCAGGGAAGAGTTCTGAGCAGGCAAGGGAACCAGAACCGTTCTATAGGGA  
GAATGGGCACAAGAAGACAAAGTCGGAGATCAGGCCGGGGTCAACAACAATAAGGCAGCGCGGTACCAAACAGAATC  
CAGAGTCCAAAAGGGTAGTCAGAGGTCAGGCCGGGGTCAACAACAATAAGGCAGCGCGGTACCAAACAGAATC  
CGGAAGAGTAGTCAAAATTCAGGCAAAGGTCGGTTTTCAGGCAGCAGTACAGGAAGGTCAAAGACAGGCAGAGGT  
CAAACAGATCAGCAGAACAGGAATAACACACCCAGGAATCACAGGAGGAAAACCTACGTTGGGCAACCATT  
ATGCTGCAGAAACCACTTAAATATTCAAATTTGGCGCCATAGTGACGTCACACGCAGCGCCGGATGATCGATG  
CAAGAGCGCATGCGCCGGACGCGCGTATGGCTCAGTGTTTAAAGGGCTGCGCGCCGAGCGTGCACCCCTAG  
GAAGAGTCGGCGGGCGTCCCCGCAACGGAGGAGGCCCACTAGACCGCCAGGTACCCCTACAGTTACATTGTG  
TTAAATTTGACTGTATATTAATGTCATATGTTTTTCTGTTTTCAGGATTTAAGAATCTGATTATTTTGTAGTTAA  
TATGGTTTTTAATTACAGCTATCAAGAGTTGATGGATCCATTATTTTTGACACTTTTTGTTCTGTTTTTTAAG  
TGCACAAATTTGTGCGTAAAGGCCTTAAGACATGTCTGTTTTTGTAAAATAAAAAAGTTAAAATGAAACTTGA  
AAGTTTTTAACACTTTTTGTTGTATGTTTCTGAGAATGTGTGGGCCACATGCATGTTGTTATGGTTTTGTCTT

GTTTTAAATGTGACAATGACTAAAGGTGGCCATACACGGGCGACTATAGCTGCCGATATCGGTCCCTTGGAC  
CGATTCGGCGGCTAATCGGCCCGTGTATGGGGAGAGCAGAGCGGCCTGGCCGACCGATATCTGGCCTGAAATT  
GGCCAGATCTCGATCGGGCAGGTTAGAAAATCTGGTCGGATCGGGGACCGCATCGGCTCGTTGATGCGGTCCC  
CGATCCGACTGCCCCATTGCCGCCCTGGGGCCAAACGATCGGATTATTATTTTTTTTACCTAAATGGTCCCCG  
ATATCGCCCACCCGTAGGTGGGGATATCGGGGGAAGATCCGCTCGCTTGGCGACATCGCCAAGCGAGCGGATC  
TGCTCGTGTATGGCCACCTTAAATGTGACAGTGACTTAAAAGTTTTTGGACAATTATGTAAAAATTAAGAAA  
GTTGATAAAGTTGACAAAACAGATCTTAAATGCTAAGAACTGATGTTGCCTTTATCTTTTTTTTTTCCATAG  
ATGTTTATCGCGGATATAACAAGCGCATTGTTGATAGCAAAAACAATGGACAGCAAAAACAAGGATTTGGACATTG  
TTAATCTTCAATGGACATCAGTTCAGAGTATAAAGAACCTGGAATTAATTTTAGTGGTGACCTGGAAACTTAA  
ATGGACATTGGTTTTGGGACTTAATGAGTAATATTTATGTTTTGTTCAATTGTTTCTACAGACTGAAGATAGA  
TTTGCATACATTATTATACCAATGGTAATTGGAATGTTAGGGCTTGTACATGAGCTTTAAAGTGCTAGTTAG  
TGAGTTTTTGGACACAGGCAGCATGGATGAGTTTATAAAAAAAAAAAAAAAAAAAAAAGCAAACCACTGGCAAT  
CTGTGAATTTTTGGTAAATGCCAGAGGGGCTGCTGTAAGATGCCACAGACAGTCACTATTTAGTGGGCTGGTGG  
GGGGCTGGTTGGGGCTCTGTGTACTTGAATGCTAGGGCTATTTTTGAAATTATGTAAGTCTGTGAAACACAC  
TGATAAAACAGAAAGAGTGTAATTTATTATCTGAGGGAAAAAGTGCTATGTGAAACTAACAATGTATGTAGA  
CAGGGCCGCCATCAGAAATCATGGGGCCTCTACAACAAAATTTTTCTGGGCCCTCCTCCTCCACGCCCTGCC  
CCCCAATTCCATTCCCCCCCAGTGATCCCTCCCATCAGCACAAAGGACACACAAAACATTGGTAGCCAGGGCCC  
CCTAATACATTGGTGCCCTGCAGCAGTGCCCCCTAATACATTGGTGCCAAGAGCAGTGCCCCCTAATACATTG  
GTGCCAAGAGCAGTGCCCCCTAATACATTGGTGCCCTGCAGCAGTGCCCCCATAATACATTGGTGCCCTGCAG  
CAGTGCCCCCATAATACATTGGTGCCCTGCAGCAGTGCCCCCTAATACATTGGTGCCAAGGGCAGTGCCCCCAT  
AATACATTGGTGCCCTGCAGCAGTGCCCCCATAATACATTGGTGCCCTGCAGCAGTGCCCCCATAATACATTG  
GTGCCCTGCAGCAGTGCCCCCTAATACATTGGTGCCAAGGGCAGTGCCCCCTAATACATTGGTGCCAAGGGCAG  
TGCCCCCTCTAATACATTGGTGCCAAGAGCAGTGCCCCCTAATACATTGGTGCCAGCAGCAGTGCCCCCT  
AATACATTGGTGCCAAGGGCAGTGCCCCCTAATACATTGGTGCCAAGAGCAGTGCCCCCTCTAATACATTGGT  
GCCAAGAGCAGTGCCCCCTAATACATTGGTGCCAGCAGCAGTGCCCCCTAATACATTGGTGCCAGCAGCAGC  
AGTGCCCCCATAATACATTGGTGCCAAGAGCAGTGCCCCCTCTAATACATTGGTGCCAAGAGCAGTGCCCCCC  
TAATACATTGGTGCCAGCAGCAGTGCCCCCATAATACATTGGTGCCAAGAGCAGTGCCCCCATAATACACTG  
GTGCCAAGAGCAGTGCCCCCTAATACATTGGTGCCAGCACCAGTGCCCCCATAATACATTGGTGATCAGTG  
TGCCCTTCAGCCCCCCCCTAATACATTGGTGCCAAGAGCAGTGCCCCCTAATACATTGGTACCCAGCAGCAGT  
GCCCCCATAATACATTGGTGCCAGCAGCAGTGCCCCCATAATACATTGGTGCCAGCAGCAGTGCCCCCATA  
ATACATTGGTGCCAGCAGCAGTGCCCCCATAATACATTGGTGCCAGCAGAAGTGCCCCCATAATACATAGG  
TGATCAGTGTGCCCTTCAGCCCCCCCCTAATACATTGGTGCCAAGAGCAGTGCCCCCATAATAAATTGGTGGTC  
AGTGTGTCCCGCAGCCCCCCCCTAATACATTGGCGACCTGCAGCAGTGCTCTTCGGCTCCTCCAGCATCTTCAG  
CAGCACCCCTTAGATCCTTCCCAGGGCAGCCCTCTGCACGTCTGTCTCCACGCGAATGGAGACAGGCCCTTTTA  
AAAGGTTCCAACCAACCAATGACAGGGCCCGTTTTTTTATTAAAGGGGGCCCAAGCGACTAAGAAAACCTGTAGC  
ACCGCCGGGCCCCCCTTTAAAAGTAAAAATTGCCCGGGCCAGGTACAGCTGTACCCGCTGTGCCCCCTGATGG  
CGGCCCTGTATGTAGACAAGCATTATGGTATAATTATTGTAAGTGTGAATAGGGTAATGTAATTTTATGAGTT  
AGTACTGTGATATCAATGGGGACAACCTCTATATGATTGTGAAGTGAAGCCTTTTAAAGACTACAAGTTAATA  
TACAATTCTGTTGAGAGACACGTTAGTTTATAAGAAGTCACTGTTAGACTTGATAGTATCATCCCAAGTGATT  
TGAATGCCCTGGGTGATTTGTGCCCTTATGGGGTGAATTTGTGGCTACTAGTGATACACTGATATTTGGAA  
AAGCATTGGCAGAATGTGTACTGAGACTAAAACCTCTGCTGAAATGAATTCAGTGGCTATTGCTATATATAAAA  
GGTGGTTAGGTACAAAACAAAGTGATGGCAGATACATAATATAGTAAACATTTTGGCTTATCAAAGAAGCACTG  
TGTGAGCTGTAAAGCCTGCAATGTAACCTGCCTTTGGTCTAATTGTTTTGAGCAGCTGATAGCTTATAATGAA  
AATTCAGAGCAAGAGGGGTGCCATATACATGTTTGCCCAAGATATATATCTACAAGTAGACACAGATTTTCTC  
ACTGGACAGAAATCATTACAGAGGTGTTTTATGACTTGGGATGCAGGTGAGATTTGTTTAACTTTTTGTTAAA  
TGTAGTGTCTTCAGTCAGAAATTACAGTCATTAATTGTTTATTTGTTTAGGGTAATGGGGACAACCAGTGAAT  
GCATATATTGCATTGAACGCAGCATTGTATGTTATCTGTATTAGAGGACTTACCAATTTGTAAACTGTTGGTT  
ATTATTATCAAATCAGTATATTTTGTAAATCAAGGGGTGGAATGCAGCACAGTGGATTTTCTATTGATTTTAT  
AATGATTTACAATATATACATCTGCTTTGACATATGAATCAAATCTTAGGTTTGGAGTCAAGTAAAAGCAGCAG  
ATTTTGTGACAGCTATTGTCCAGTGTTCCATGTACTATGCTTTTGTCTATTTTATATTGCTGGGTAAACAATA  
AACACAGGTATTGTTACCCAGCAAATATCCTTGAATAAACAGACAGCATATAGACAATACACTCTATGTACA  
ACTTATTTGAGAAACAAATAAGGCCTGCTACAAAGCTAATAAATTGTATAGTTAGATCTTTTGTTCATGACAA  
AAATTTGCACATAATATTGCACAAGTCAGCACTTGGTGTGGGGGTTTTGCTAAGAACTCTGGTATAAAATGG  
AGCCTCCACCATGTTTTCAGCAGCTTCGCCTAGGACTCCTGAACGAGTGCCGGGACATTTGGATCATCGCTTGG

TTATTGGGAACCTGAAGGTCTTGCACCAAAGGTTGTGGGGCTCCCCGATTGTGCTGAATTGATGCAGAACTGG  
CTATGCTTGTAAC TATAATCATACTAAGATAAGTAAATCTATTTAATTCTATTATTACTTGTGTGCATGTAAG  
TTATTGCTCACTAACAGTCTATCAGAAGGTTTAAATCATTGATCCTGCATATGTATTTCATATTTGTCATTAATG  
TCAATTAATACAAATTATTAATGTTAATAAAGGTTACCCCCTTTATTAC
