# Supplementary material
Source: PubMed Central journal article supplement (PMC8278674)
Supplement: 12977_2021_564_MOESM4_ESM.pdf [file 12977_2021_564_MOESM4_ESM.pdf]

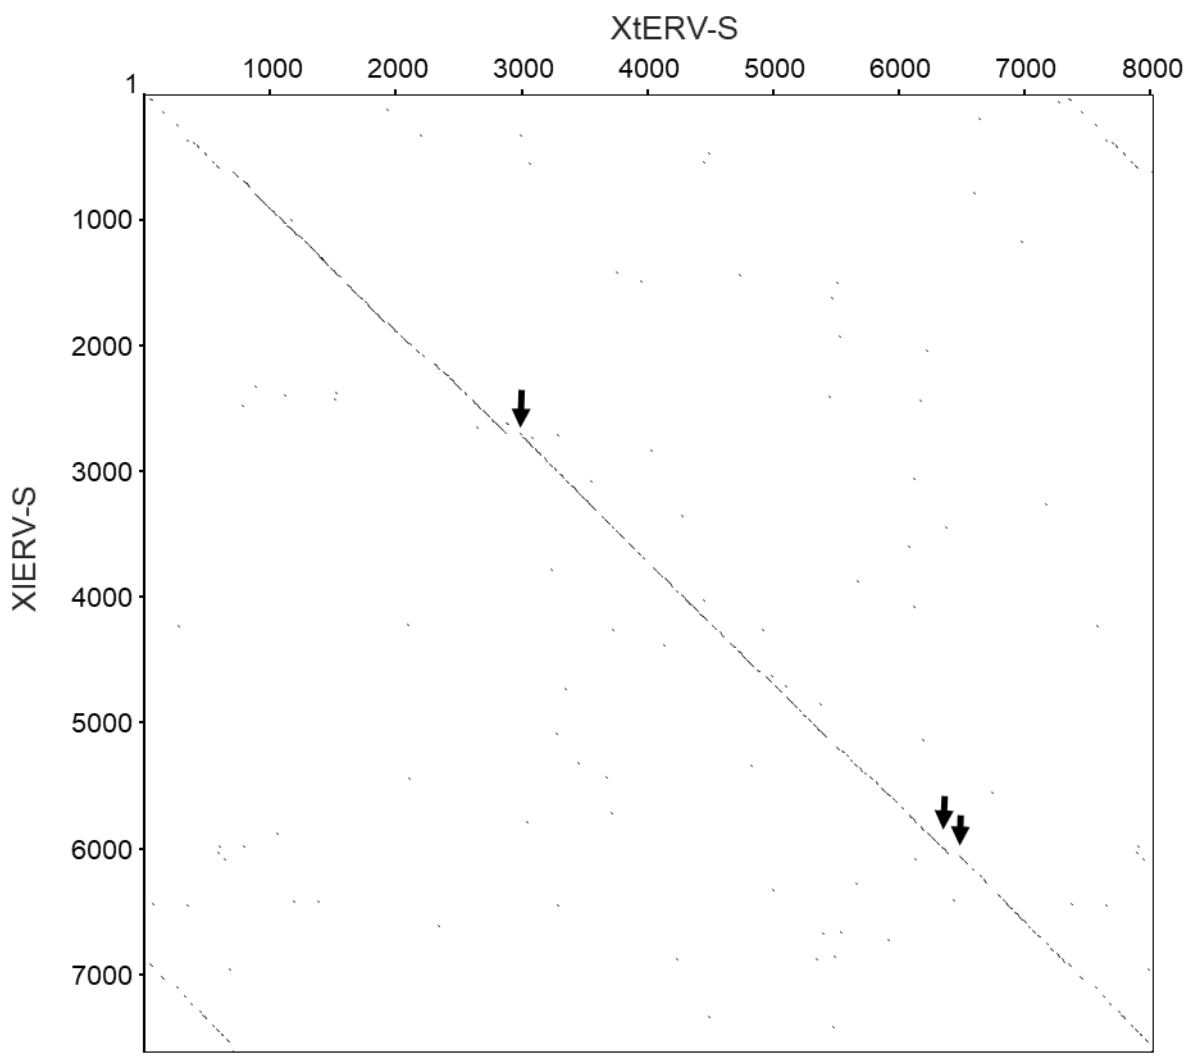

10 20 30 40 50 60 70 80 90 100  
XtERV-S TGTAGTGCAGTAGGTTCTTTACTATgatttgt-atGATTTACAATTTATACATGCTTTAATATGTTATGTATATATATATATGTTAGTTAG  
XlERV-S ----- .ATG.AA.ACA.GGG.T. . . . . T.T. . . . . A. . . . . TC.GTT.TAA.A. . . . . C. . . . . AC. . . . . ATA. . . . . A

110 120 130 140 150 160 170 180 190 200  
XtERV-S TAAGTTTAAATCAAGCAATTC-TAGAGATA-AGGGGAGTCCAGTGTCCCTTGTACATATATTGTTGGGTAACAATACTCGCTTTATTATGTAACAATAAAC  
XlERV-S .GGA. AGTCAGTA.G. . . . . AA. . . . . A.CCT.CT.AG. . . . . TG.GCC. . . . . C.A. . . . . --.C.GTCATAGCC. . . . . G.T. . . . . TTGT. . . . . T.T

210 220 230 240 250 260 270 280 290 300  
XtERV-S AATGACTATAGAC-TGTTTACCAGCAAATA-----CAACAAGCGGACGGCAGGCAGACAATGCCAATGTATTAAATAGAAGCTTGAAGTATA  
XlERV-S .G.A.AC. . . . . GTA.TG. . . . . C. . . . . GCCCTAATAAT.C.G.A. . . . . AAT.C.TC.T.-A. . . . . T. . . . . G.T. . . . . C.G.CT.A.-G

310 320 330 340 350 360 370 380 390 400  
XtERV-S AAGTTTGGTATCTGATCAGACACAATGGCTGACCATTGTTAAACAATATTGTTCAAGTCAATAGTTGGGCTGGGGGTTTTCTCAAGAAGCTTTTGCCA  
XlERV-S .G.CA.AAAC.T.C.G. . . . . --T.T.T. . . . . T--. . . . . T.G. . . . . T. . . . . CCT.T. . . . . GC. . . . . G. . . . . T. . . . . AAA.--. . . . . A. . . . . G.

410 420 430 440 450 460 470 480 490 500  
XtERV-S TAAAAGAACGGCTCTGCCTGGGTCAGGAGCTTCGCCTAGGACTTCCTGAACGAGTGCAGGATATTGGATCATCGCATGGTTATCGGGAACCTGAAGGT  
XlERV-S . . . . . C.A. . . . . T. . . . . A. . . . . A.T.T.A. . . . . A.C. . . . . G. . . . . A. . . . . T. . . . . T.A. . . . . G.T.

510 520 530 540 550 560 570 580 590 600  
XtERV-S TTTGCACC-AAAGGTTAGGGGCTCCCGAGTTTGTCTG--GATTAATGCTGAACCTGGCTATCTTTGTAACCACAAAACCTGACGAAGCTAAGTAAATGT  
XlERV-S CA. . . . . T. . . . . C. . . . . CA.A. . . . . T.G. . . . . ATT. . . . . G. . . . . T.TCC. . . . . TT. . . . . C.--T.A. . . . . A. . . . .

610 620 630 640 650 660 670 680 690 700  
XtERV-S TTT-AAATCTTACTATGTTGTGTGTAGTATTGCTCATTTAAATAGTTTTTCATCAGAAGGTTTAAATCATGATCCGTTTAAATATAATAATATTG  
XlERV-S . . . . . T.C. . . . . CCTTC.C-----

710 720 730 740 750 760 770 780 790 800  
XtERV-S ATAAAGGTTAACCCCTTTATTACATTTGGCGTAGTCGGCAGGATTAACCCCTTTGGTGTCTGTTAAATGCTGCAATAGCTTGTGCAGGAAGCTGAGAATTT  
XlERV-S . . . . . C. . . . . A. . . . . A. . . . . T. . . . . A. . . . . G.G. . . . . A.T. . . . . A. . . . . A.

810 820 830 840 850 860 870 880 890 900  
XtERV-S ATGTTTGTAG-TTTGTATGGTAGTGTAGTGGCAGTATTGTAGTGGCTTGTGCAGGCATACATACGTGTT-AACAGATA-----GCAATAATGTTCTGTC  
XlERV-S . . . . . AG.AC.AC. . . . . --. . . . . A. . . . . G. . . . . A.T. . . . . T. . . . . AG. . . . . TATTTAA.G. . . . . A.

910 920 930 940 950 960 970 980 990 1000  
XtERV-S TGGTTAAAAACAAGGTTAGAGGGGTAGATGATCAAACGAGCACCTTCCACAGTGGGCTAGTTCCGGACCTGGACCCAGTTGCTCGTAGTTGGTTA  
XlERV-S . . . . . A. . . . . G. . . . . A. . . . . A.

1010 1020 1030 1040 1050 1060 1070 1080 1090 1100  
XtERV-S AGTATCAGCAACCTTTTCAAGTGACGAACCCGGTCACCAGTTGCTGAATTTGGATTTGCTCGGTATTCCAAAAAAGAGCAGAAAGCTGCAGCACAAGT  
XlERV-S . . . . . A. . . . . G. . . . . T. . . . . A. . . . . A. . . . . T.G.C. . . . . G. . . . .

1110 1120 1130 1140 1150 1160 1170 1180 1190 1200  
XtERV-S GGGTTGGTTGTGTTTTTCAGGCGCTCATGGAGGAGACAATCAAAGGGAGTCAAGTTGAGCTTGAACCTGCAGGCAGTTAAAGATCAACTGGTTGTGTTAAGA  
XlERV-S . . . . . T. . . . . T. . . . . A. . . . . G.--. . . . .

1210 1220 1230 1240 1250 1260 1270 1280 1290 1300  
XtERV-S GAATGTTTTTCGCTCCTCAGAAAAGTATCGTGAGGAGATGCAAACAGAGTTTTCAAATTATGTAGTAAAAACAGTAAATAAACAGCACAGAAAGAAGGGA  
XlERV-S . . . . . C. . . . . C.CT. . . . . G. . . . . -----T. . . . . TG. . . . . A. . . . .

1310 1320 1330 1340 1350 1360 1370 1380 1390 1400  
XtERV-S GGAAATCACCAGAAATGGTGCAAAGTTAAAGTAAGGGCTCTTGTAAATAAAGGAGACTGGGGGAGTTAGCCCAATTGTCAAGCCGAGACTCAGATGA  
XlERV-S . . . . . T. . . . . G.T. . . . . A. . . . . G. . . . . A. . . . . G. . . . . T. . . . .

1410 1420 1430 1440 1450 1460 1470 1480 1490 1500  
XtERV-S AGAGATTGAGATAGAGATGATATAGAAGAAGAAGAA-----TTAAGACCAATTGTAACCTACCAAAACAAGGAGAGAAGTACACAAAAGAGCAGGCACT  
XlERV-S . . . . . A. . . . . GAAGAA. . . . . -----C.T. . . . . T. . . . . A.

1510 1520 1530 1540 1550 1560 1570 1580 1590 1600  
XtERV-S GATAATAGAGATCAGGATTATAGAGGAAGTGCAGAAGCAGCAGAAGCAATATACAGAGGAAACTCGGTTCATATACTGCAGGAGAATTACAGAAATTGG  
XlERV-S . . . . . T. . . . . C. . . . . C.A. . . . . G. . . . . T. . . . . C. . . . . T. . . . . GC. . . . .

1610 1620 1630 1640 1650 1660 1670 1680 1690 1700  
XtERV-S GTCAGAAATTTGCCAGAAAGGTGGTGAACCTATTCTAGAATGGGTTTTGAGAGTGTGGGATTTGGGTGGGGATGGTATCATGCTCACTAGCAGGAGGC  
XlERV-S . . . . . A. . . . . T. . . . . A. . . . . A.G.T.T. . . . . CA. . . . . A. . . . . C.A. . . . .

1710 1720 1730 1740 1750 1760 1770 1780 1790 1800  
XtERV-S GATAGGACTGGGGAGTATTGCAAAAAGACCCAGGGTACGGCTTTATCTCAGGAGAGCCCGTGATACTACTGTGGCTTTTTCCCTGTTACATTTGATCAGG  
XlERV-S . . . . . A. . . . . A. . . . . C. . . . . TCA. . . . . GA.A. . . . . AT. . . . . A. . . . . A. . . . . G. . . . . A. . . . .

1810 1820 1830 1840 1850 1860 1870 1880 1890 1900  
XtERV-S GATTCAGTCTACAAGTATATGATACCCCACTGAAATGATGGATTCTACCTCATGGCATACTATAGGGGAGGGGATACAGAGGTTAAGGAGTATGGAT  
XlERV-S . . . . . TT. . . . . C. . . . . TG.TT. . . . . A. . . . . A. . . . .

1910 1920 1930 1940 1950 1960 1970 1980 1990 2000  
XTERV-S GTGTGAGTGGTTTGAATGCTGATCCATTAGCTTCAGCACCCCAATAAACCTACTGTAAAAGAGACATGGTCAGGACCAGACATGGCTCCCTTCACTGC  
XLERV-S .....C.....TG.....T.....C.....T.....

2010 2020 2030 2040 2050 2060 2070 2080 2090 2100  
XTERV-S ACACATGAAAAATAAGCTGCTAGCAGGATCTCCACCCATTGAAAGCTCCATTGTTACACATGTTAAGTGCTTTAGATGCCAAGCAGGGTGAATACAT  
XLERV-S .....C.....TT.....T.C.....T.T.....A.....

2110 2120 2130 2140 2150 2160 2170 2180 2190 2200  
XTERV-S GAAGCTGCAACATTGCTGGACAGTTGGGAGAGTTAGAACGTATAGGGGAAAAAGTATCTAGACACCGTGTAAATGCAGAAAGGGTACAGAAAGATTAA  
XLERV-S .....T.....C.C.....C.....G..TC.....A.....T.....G.....

2210 2220 2230 2240 2250 2260 2270 2280 2290 2300  
XTERV-S AAATAGTCGGAGACAGTTGTTTTGATTTACTTCAAAGTGAG-TACCAAAGCTGAAATGATGGTATGCCACAGTTGATTGTTGAAACTCTGGA  
XLERV-S .....C.....A.....G.....G.G.....TA.....A.....T.....

2310 2320 2330 2340 2350 2360 2370 2380 2390 2400  
XTERV-S AACAACTAAAAACAGGGGAGGCTGAAATCAACCAACCAAAAAA-GGTGGCAACCAAGTATAGAGGATGTCCTTACTCCTCAGCTCCTCTCA  
XLERV-S .....T.T.....A.....T.A.....A.....A.....T.....C.....T.....T.....

2410 2420 2430 2440 2450 2460 2470 2480 2490 2500  
XTERV-S ATAAAGGAAATTTAACCCATACAGGGAAGTGGCTGAGGAATGGCAAGACATAAGGAGAGGAGTTGGGAGGTGCCAGTCTATAGATTGACAGGATGG  
XLERV-S CA.....C.C.....A.....C.....T.G..C.....C.....C.....

2510 2520 2530 2540 2550 2560 2570 2580 2590 2600  
XTERV-S CAGATCCCTGTGCCACTGGTAAAAATTAACACAATGAACACAGGGGATCAACGCCATATATATCAGTGGCAATATATGGCAGGGACAGTCAAAACCA  
XLERV-S .....T.....C.....T..GC.....A.....G.....

2610 2620 2630 2640 2650 2660 2670 2680 2690 2700  
XTERV-S CAAACGGTTACTGCACTTCTAGATACAGGGGCTGAAGTAACTTTGTTCATGGAATCAAAAACGACAGAGTGCAGGAATGGTAGCTATAGAGGATTGG  
XLERV-S .....A.....TG.....A.....CA..A.....C.....

2710 2720 2730 2740 2750 2760 2770 2780 2790 2800  
XTERV-S GAGGTCAACATACACTGGCTCACAAGGTTCACTGCAGATTACAGATTGGAAGGGTCCCATTTTTAAAGCACGTGTGTTAATATCTGAGCTACCTGATAA  
XLERV-S .....T.T.....T.....A.....A.....A.....T.....A.....C.....

2810 2820 2830 2840 2850 2860 2870 2880 2890 2900  
XTERV-S CATACTAGGAATGGATATTTAAGGGCCAGACTATCCATACTGATGAGGATGATGATTTGGTACCTCAGTTCGTTCTTTTCTGTTTCTGCAGTT  
XLERV-S .....T.....T.....C.....A.....A.....A.....C.....

2910 2920 2930 2940 2950 2960 2970 2980 2990 3000  
XTERV-S AAACCAATTTTAAAGGG-----ACATGCCAAGT-----GGACACCAAGTACATCCCTCCGCCAAGCACCC-TGTCATCTCAGCAGTA  
XLERV-S .....CCC.AGG...TTTCCCTCAG.G..TGG..CTCGGAGCA..GG..TG.G...-GGAG.A.G.TGG...GT.GCAC..GGTCT.G.AGCCG

3010 3020 3030 3040 3050 3060 3070 3080 3090 3100  
XTERV-S TCGCATACCCGGAGCCACAAAGAAATTAAGTAA-----  
XLERV-S GTCTGGGAG.A.....G..GG.GGA..GCAGTCATCGGAGGGAACACAGAGGGGTAGGGAGAGGGCAGTGGTTCTCCTGCTCATGTTTGTGTTTT

3110 3120 3130 3140 3150 3160 3170 3180 3190 3200  
XTERV-S  
XLERV-S TCTTCTGGCAGCGTCTGCCCTAGGAGCAGTGGACGTCGGGAGAAAGCGATGGCAGGAGTGACTCACATCAGCGGCCAGTGGTACCGCCGAGGAGT

3210 3220 3230 3240 3250 3260 3270 3280 3290 3300  
XTERV-S  
XLERV-S CGTCAGCATAGCGAGGAAAGGAGCAGGCCCGCAGGATGTGGCTTCAGGTGGGCCAGACGGTGTAGTCTCCAGCATGGTGTGAGTGTCACTCAATGCTAT

3310 3320 3330 3340 3350 3360 3370 3380 3390 3400  
XTERV-S  
XLERV-S GGGTTGTTGCAAGGGCTGAAAGACTTTTTAGGAAATGGGAATCGAGGGAGCCACGGGACAGGTGGCAAGGGTGTGGGTGAGAGTGGACAGAGGG

3410 3420 3430 3440 3450 3460 3470 3480 3490 3500  
XTERV-S  
XLERV-S ACTGGTGAAGTATGCTCGGAGTCCAAGTTCCGGGATCGAATAGGACAGCCCTGGGGCATCAGGAGGGGTGGACAGGGCAGGTTGTCCGCAAGG

3510 3520 3530 3540 3550 3560 3570 3580 3590 3600  
XTERV-S  
XLERV-S GCCAGGATGACCAAGGGGTTAAAGGGAGCAATGAGCAGCCAGTTCGGGAAGCATTCAGAGGGCCACAGAGGGGGCTGATGTGCATTTGCAGGCC

3610 3620 3630 3640 3650 3660 3670 3680 3690 3700  
XTERV-S  
XLERV-S CCTCGGATCACACGTAATAAAGTAGGTTAAGGAAAGATTTGAAAGGGGAGTTTGTGGAAATTTTTCCCTTCTCCCTGGAGGAATCGGTGGAGTTA

3710 3720 3730 3740 3750 3760 3770 3780 3790 3800  
XTERV-S  
XLERV-S AAGGATGAGGAAAAAAGGACGGGAAGGAGGAGGAGGAGGAAAGAACAGCGTTATAGGAAATCAACAAGACATTTGGCAGCTGGCTTAGGG

3810 3820 3830 3840 3850 3860 3870 3880 3890 3900  
-----  
XTERV-S  
XLERV-S CATTTCGATTTTGGTAAGTATAATTGGCGAAAAGCGGCCAGAGCATTGTTCTCCCTTTTTTGGCTATGTGGATGGGATTTGGGAAGCATACAGGGTTTA

3910 3920 3930 3940 3950 3960 3970 3980 3990 4000  
-----  
XTERV-S  
XLERV-S TGGTGGCTTGGCTTGGAGAAATTTGTTTGTTCAGAGTGGGTGGTGGCACAACGTGCCAATCCAGAGTTTGGTGCATTATCTTGATGATTTCTTGT

4010 4020 4030 4040 4050 4060 4070 4080 4090 4100  
-----  
XTERV-S  
XLERV-S GCGTGGGCCCGCGATTTCTGATGAGTGCCTACATGTGCTGGAGACGCTACAAGAGGTGGCTAATGAATTCGGGGTAACGTTAGCTCCGGACAAGACGGT

4110 4120 4130 4140 4150 4160 4170 4180 4190 4200  
-----  
XTERV-S  
XLERV-S GGGTCCAGTGACCTGCCCTTTGTTTTTGGGGTTGGAAATCGATACAATGGCGGGTGAATGCCGCTTACCCTTGATAAGTTGTGTGATTTAAAGCAGTGG

4210 4220 4230 4240 4250 4260 4270 4280 4290 4300  
-----  
XTERV-S  
XLERV-S GTGGATACACTGGCACAGCGGTAAAGGTTAAAGTTAGAGAGTGCAGTCCCTTATGGGTAGACTAAACTTCGCGTCCGGGTGATTTGATGGGCAGGG

4310 4320 4330 4340 4350 4360 4370 4380 4390 4400  
-----  
XTERV-S  
XLERV-S TATTCTGCCGACGGTGGGCAAAATGTTGGCAGGGGCACCTCATCACCATGTCCGGTGAATACAGAGTTCAGAGACGATTTGTTTTTGAATCATTCAA

4410 4420 4430 4440 4450 4460 4470 4480 4490 4500  
-----  
XTERV-S  
XLERV-S TTGAAAATTTATTTTCCCGACGGGAAATAACTAGTATGGTGTGCAATTTGTTTACGGACGCAGAGAGGAGTCTTGGTTTCCGGCGGTATTTAGAGGGG

4510 4520 4530 4540 4550 4560 4570 4580 4590 4600  
-----  
XTERV-S  
XLERV-S AGATGGTCCGCGGAGGTATGGTCGGGAGAGTGGGCGGGTTAGGTCTGACGAGGAACCTTTGTTTTTGTAGAGTTGTTTCCCATGTTATGCCCCGTTTTA

4610 4620 4630 4640 4650 4660 4670 4680 4690 4700  
-----  
XTERV-S  
XLERV-S TTTGGGGGACAGCTTATGCAACAGGAGAGTGATTTGTATCGGACAATTTGGGGTTGTACAGGCAATAAACAGGCAGTCCGCTTCTCCGCTGAGGTG

4710 4720 4730 4740 4750 4760 4770 4780 4790 4800  
-----  
XTERV-S  
XLERV-S GTGCGACTTTTGGCAGTCTGGTTTTGCGCTGCTTGCAGCTTAATGTCAGTTTTTCGAGCAGTGCACATTCCTGGGGTTCATAATGAGATTGCTCTTTGTC

4810 4820 4830 4840 4850 4860 4870 4880 4890 4900  
-----  
XTERV-S  
XLERV-S TCGTTTTCCAGTGGGTTCAATTTTCGGAAATTTGGCTCCGTTGGCGCGGGAGGAAGGCCACCATTTCAGTGTGCCTGTGGAGACTCACACGGACGCACGGA

4910 4920 4930 4940 4950 4960 4970 4980 4990 5000  
-----  
XTERV-S  
XLERV-S TTGGCGGGTGGTGGATCATCGTGGCCACGACCAGTGGTGGCATAATGGTAAGGCTGGAAGAATGGGAGCAGTTGGTTTCATTGGCCCTCGGGTAC

5010 5020 5030 5040 5050 5060 5070 5080 5090 5100  
-----  
XTERV-S  
XLERV-S ACAGCTACTACAGGCCAGGCACGAACCTCATGCTGTGGTGGGTATACTGGATGGCGGAGCAAGGTCGATCAGTAGCTCAGATTGAGAAGAGTAAGGCTGCA

5110 5120 5130 5140 5150 5160 5170 5180 5190 5200  
-----  
XTERV-S  
XLERV-S TTGGCCTTTTGGTTTAAAATACATGGTTGGGAGGATTTGTGCAAGGTTTTGTCATTGGACAGGCATTAAAGGGTTGAAGAAGGTCACGTACAGCAGGC

5210 5220 5230 5240 5250 5260 5270 5280 5290 5300  
-----  
XTERV-S  
XLERV-S CCATGCTCTTTAGAAAGTTGGCTAGCGTTTTGATTAATAATTTGCTGTCTTAATACGAATCTTTTTTATTCGGGTGGCTTCGTTTTGGCGTTTTTTG

5310 5320 5330 5340 5350 5360 5370 5380 5390 5400  
-----  
XTERV-S  
XLERV-S GCACGTTACAGGATCGGGAACTGGTCAGCCGAGTAAACGGGCGTACGGGGGCTGCAGAGGTGGGACGTAGAATTGTGTCAGGAACACGTTGGGGATATG

5410 5420 5430 5440 5450 5460 5470 5480 5490 5500  
-----  
XTERV-S  
XLERV-S GCTCCGCCGATCAAAGACCAATCAGTTAGGTAGAGGACGCCAGTGGTGTATATGCCTTGAAAGGGGGCCAATTTGCCCTTTCAGTAATGTGCAACAA

5510 5520 5530 5540 5550 5560 5570 5580 5590 5600  
-----  
XTERV-S  
XLERV-S TTTTTGGTCGCTCTGCCGCGGCTGGACGGCCCTTCTTAATTCATGAAGACGGCAGCGCTGACCAGGTTTCAGTTTGTGAGGGTTTTTAGGATGGGGT

5610 5620 5630 5640 5650 5660 5670 5680 5690 5700  
-----  
XTERV-S  
XLERV-S TAGAGGCATTGGGCATGGTTCCCATGGAGTATGGATCGCATTTCTTCTCGTATTGGGGCGGCTACTGAGGCGGCGCGCTCGTCTTGGTGGAGGGTGGT





9510 9520 9530 9540 9550 9560 9570 9580 9590 9600  
XTERV-S GATTTTGATTTAACCACTCAGTGTGACTGGGATGTTGACGTTAGAAAAGATGAATGGGGGAATATTGTGTCACATATGTTCTTTGGTCGGGCACAGT  
XLERV-S .G.....A.....T.....CCAA.G.G.....CC...T.T.C.....A.A.....  
9610 9620 9630 9640 9650 9660 9670 9680 9690 9700  
XTERV-S TTAAGAAAGGACAAAAATAGGACAAATAGTGATTTTACCAAAACGTTTTCAGTGAAGGGAAATATTATTCCACACAGTTAGGAACAAAGGTATGGAT  
XLERV-S ...AG..A.G-----A.....T-----A.....G.....A.....G.....  
9710 9720 9730 9740 9750 9760 9770 9780 9790 9800  
XTERV-S AGCTCCAAGTGTAAACAGACAGGGGTAGAAAACCTGGTAGAAAAGGAGAAATGTTGGCCTGGGGTCTGGGTCAACAGCATTAGTTTAAATAGATGCTGAA  
XLERV-S CT.C...A.....A.....T.A.....G.G.....CA.....A.....GA..T.....  
9810 9820 9830 9840 9850 9860 9870 9880 9890 9900  
XTERV-S GATAAGCCTGTTTATGTTCCCTCTCACAGATTACTACCCTACCATGAGGAGTTTGCCTTGTCTACTGATGCTCGCGATATGCTGTATGAAAGTGACTGC  
XLERV-S .....C.....TT.G.....CC.C.A..A.T.....T..A..T..C..AT....C.....  
9910 9920 9930 9940 9950 9960 9970 9980 9990 10000  
XTERV-S GGAAAGGAATTTTATCATGAAACCTGAAAGCTACTGCTGCAGTATTTAATGTAACAAACTGTTGGATATGTGGCAAATCCACATGCGACTGAAGAA  
XLERV-S .....A.C.C.....A...GG..A.CA.....A.....A...T.....T.T...A.....C...G.....  
10010 10020 10030 10040 10050 10060 10070 10080 10090 10100  
XTERV-S GGAATTCACATTTATGGACTGCCATTTAATATGAGTTGGATAAAGCAGAACCCGAGTGGAACTTTGTTTCAATATGACTACAAAACATGCTGCTA  
XLERV-S .....T.....G.....G.T.....T.....A.....ACA.....G.....CAA.-  
10110 10120 10130 10140 10150 10160 10170 10180 10190 10200  
XTERV-S TTGCTAGATATGCAGGTACAGAAAAGAGCAACAGTTGAAGTTAACCCGAAATCAACAGGGATTTTGTGTGTCAGAAAATCAACCCTGAGACTGT  
XLERV-S -----AA..T.T.TA.....C...A.G.A.G.....A.G...T.....  
10210 10220 10230 10240 10250 10260 10270 10280 10290 10300  
XTERV-S GTGGTTAGGAAAAGTCAATGTGACTATGTTGTCAACACAGTTAA  
XLERV-S .....T.C.....T.....T.A.....AGGAACAGTAACATCAAAAAATAAAAGTGTTTTAAAGTAATGAAAATATAATGTA  
10310 10320 10330 10340 10350 10360 10370 10380 10390 10400  
XTERV-S  
XLERV-S GCGTTCGCCTGCACCTGTAAAACCTGCTGTGTTACTTAAAGAACTACTATTGTTTATATAAAATAAGCTGCTGTGTAGCAATGGGGCAGCCATTCAA  
10410 10420 10430 10440 10450 10460 10470 10480 10490 10500  
XTERV-S  
XLERV-S GGAGAAAAGGCTCAGGTTACACAGCAGCTGTTTATATGAACATAGTAGTGTTCCTGAAGCAAATGATCAGTTTACCAGAGCAGGGCAAGACTACAT  
10510 10520 10530 10540 10550 10560 10570 10580 10590 10600  
XTERV-S  
XLERV-S GATATTTTCATTACTTTAAAACACTTACATTTTTTGGTGTACTGTTCTTTAA CAACACACATGTAATGGTGACAGGAAAAGGGAAATGTTTATATG  
.....A.A.....A  
10610 10620 10630 10640 10650 10660 10670 10680 10690 10700  
XTERV-S TTTTATGTT-----AAGCAATGTTCAATTGATT--TTAGAGTTACTACAAATGATACGCATATTTGCGAAAGATCAA--GTACAAGC-----  
XLERV-S .....A.ATTCTGCCA...G.CCCC.CAGC...CAACC...CC.CT.TGC..A.T.GATGG.GACA.A...AC.TT.TTT.CTTT..TAGCCACAGA  
10710 10720 10730 10740 10750 10760 10770 10780 10790 10800  
XTERV-S  
XLERV-S ATGACACTGCCAGAATTAAGATGGCCATAGATTTTAAAAGATCCAATCTCATCGTGAGACCAAGATTTTCTCAGAACGATTGTACGATAGTACGAAT  
10810 10820 10830 10840 10850 10860 10870 10880 10890 10900  
XTERV-S  
XLERV-S TGACCATCAACTAAAAGACAAATGTGCCAGGAAAACAAAGGGGAGCTGCCGTGCTTGGCCCTGCAAAACATAGATAGATTGCACTGGGACCAACAAGATT  
10910 10920 10930 10940 10950 10960 10970 10980 10990 11000  
XTERV-S  
XLERV-S TTTTGACCTGGCCGATCAATTTCTGACAGATGTCGGCCGAAAATTTGTAAGATGTACGATTGTTTCGAATGCCACTAACCACGATAATTTGGAAGGAT  
11010 11020 11030 11040 11050 11060 11070 11080 11090 11100  
XTERV-S  
XLERV-S TGGTCGGACTTCCCTAAAATCGCCGTTCCAGCATGAAGAATCGTCGCTCTATGGGGAGCTTTAGACAACCTGTTATCTACAAAACCCCTAGATCCCTTA  
11110 11120 11130 11140 11150 11160 11170 11180 11190 11200  
XTERV-S  
XLERV-S TCCTTTAAGGAAAATCCCAACACACTGCTATTTGGTGTATAACTTGCATTTATATTATTTTGCAAAATGCATAACCTTGCATTTATCAACATTGAACCT  
11210 11220 11230 11240 11250 11260 11270 11280 11290 11300  
XTERV-S  
XLERV-S CATTTCAGTTTGTCTACCCAGTCTCCAACCTAGACAAATCACTCTGCAAACTCTGCATGGAACCTATAGTTCGCACAATTTAGTATCATCTGCAAAA  
11310 11320 11330 11340 11350 11360 11370 11380 11390 11400  
XTERV-S  
XLERV-S ATAGAAACAGTACTTTCAATGCCACCTCCAGGTCATTAATAAAGGCCTAACAACACTGGTCCAATTAGAAAATGTTCCATTTACCACCCTCTTTGTA

11410 11420 11430 11440 11450 11460 11470 11480 11490 11500  
XTERV-S  
XLERV-S GTCTATCTTTTAGCCAGTCTCTATACAGGTAACATTCTTAATTTAACAGTAACCTTTTGTGTGACTGTATCAAATGCTTTAGCAAAGTCTAAGTA  
11510 11520 11530 11540 11550 11560 11570 11580 11590 11600  
XTERV-S  
XLERV-S AATCACATCCACTGCCATCCCAGAATCGAGGTCTCTACTTACCTTCTCATAAAAATAAATTAAGTTTAAATAAAATCAAAGCCTTAACCTACCTATTAA

11610 11620 11630 11640 11650 11660 11670 11680 11690 11700  
XTERV-S  
XLERV-S TCTTTGCTCTCAACTGGACTGTTTCCCTTCTCAACTAAAACATGCTCTTGTGACCCCATTTCTGAAAAACCTCTCTTGATCCCTCCAATCTTGACAAAC  
11710 11720 11730 11740 11750 11760 11770 11780 11790 11800  
XTERV-S  
XLERV-S CTCTGACCTATCTCTGCTACCTTTCATCTCTAACTACTTGTAGCGCCTAGTCTACAACCGACTAACCTCATTCTCTGACAATAACCTGCTGGACC

11810 11820 11830 11840 11850 11860 11870 11880 11890 11900  
XTERV-S  
XLERV-S CCTACAATCTGGTTTTAAGCCACAACACTCCACGGAACTGCCCTGACTCGATTAACTAATGACTTTTAACCGCTAAAGCCAACAATCATTCTCACT

11910 11920 11930 11940 11950 11960 11970 11980 11990 12000  
XTERV-S  
XLERV-S CCTAATACTGCTTGATCTCTCAGCGCATTGACTACTATAGATCACCTTCTCCTCCTCCAGTCCCTCCATTGCTTGCCCTTCGTGACACAGCCCTGTTGG

12010 12020 12030 12040 12050 12060 12070 12080 12090 12100  
XTERV-S  
XLERV-S GTCGAGGCAGGCAGAGAATAAACGTTATCAGGCAGGCAAGGGTCAACCAGGAAGTCAATCAGAAGAGGTAGTCTGTAATCAGGCAAGGGTCAAGTCCAG

12110 12120 12130 12140 12150 12160 12170 12180 12190 12200  
XTERV-S  
XLERV-S AAGTCAGAATAGTCAAATAGCCAGGCAGGGGTCAAATCAACAGGTTTCAAGATATAGCAACGAATAGCACAAAGCTCAGAAGCACCAGGAACAATATC

12210 12220 12230 12240 12250 12260 12270 12280 12290 12300  
XTERV-S  
XLERV-S CTATCACGGGCAATCCATAAGGTAAAACGTACCTTTAAATACATTTGAAATTCGCACCTTTGCGCGCTGACGTATACGTCAGCGAGCCTGCGCCTTTA

12310 12320 12330 12340 12350 12360 12370 12380 12390 12400  
XTERV-S  
XLERV-S AGACGCAACCAGACGCGGCACGCGCGAAGAACCCTGCGGGCGTCCCGCTTGGAGTTTGGCGGGCGTCCCGCCGACCCCAACACCCTACTGGGGTA

12410 12420 12430 12440 12450 12460 12470 12480 12490 12500  
XTERV-S  
XLERV-S AGTTATTACAATGTTGCAGAGATGCCCTTATACTTTCAAATTTTGCACGTCTGAAATTTAGTGTTTTAGTTACTCCCTATAGAATTGCTCTGCAACAG

12510 12520 12530 12540 12550 12560 12570 12580 12590 12600  
XTERV-S  
XLERV-S AATCTCAAAGGAGACCATGTTATGATCACTATCTCTGGTATGCTGTAATAATCTTACCATCTAATAGTACCAGGTTAGGAATATACTGGCAATATCAGTT  
.....C.T.....T.....C.....G.....

12610 12620 12630 12640 12650 12660 12670 12680 12690 12700  
XTERV-S  
XLERV-S ATATCTAGCAACTGTTCCCAATGCCCCAATCAGTTGACTTTATTTTGGGAAATAATGTTTATAAGTGGCTACCATATAATGGGCAGGAAATGTTTAT  
...A.T...C...G.T...C...G.C...T...A...ACC...T...A.C...T...G...C...

12710 12720 12730 12740 12750 12760 12770 12780 12790 12800  
XTERV-S  
XLERV-S ATAGGAAATATAGCACAAAATTTAGAGTATTATTGAGAACCACAAAAGGGCATGTGAGAAATGGAAA-CGGCATTGTCCTCTCTCATGTTAATGAA  
.....G.....T...A...A.....T.....TG.....A.TTT.....T.....G...G.....

12810 12820 12830 12840 12850 12860 12870 12880 12890 12900  
XTERV-S  
XLERV-S TTACCCGAAGAG-TGGGATACCTCAGAAGAAAACAGATTGTTATGATTTTAAATACCCCATATGAGTAG-----CAAAGCTGTGCAAATGATGAGA  
...T.GT...G.G...G...C...G.G...A.CA.T...T...T...T.CAAGT...G.T...A...AG

12910 12920 12930 12940 12950 12960 12970 12980 12990 13000  
XTERV-S  
XLERV-S AGAATGCTAGAAATAATGAACATGCTTTAAACAACACATTAGATGGCTTGACTAGTCTTACCGAGGAAGTCAGACAAATGAGGTTAGTGGTTCTGCAAA  
.....C.....T...A...C.C...T...C...A...C.AC...

13010 13020 13030 13040 13050 13060 13070 13080 13090 13100  
XTERV-S  
XLERV-S ATAGAGCATCGCTAGATATATCCTAGCTTCAAAGGGAGGTGATGTGCTCTGATTGGAGATGAATGTTGCACATATATCTCAGATAAAAGTCTGGAAGT  
...C.....T.A.....T.....G...A...A...

13110 13120 13130 13140 13150 13160 13170 13180 13190 13200  
XTERV-S  
XLERV-S AGAGGATGAC-----ATCTCTGAAGCTCGAAAGTCAGTAGCCAAATTACATGCCCCAAAATACTGGTAGTTGGTTATTTAGTTGGTTGGGGCAATGGGGAA  
.....TAGAGG...A.....TG.T.....G...G.....T...G.....G.....

13210 13220 13230 13240 13250 13260 13270 13280 13290 13300  
XTERV-S  
XLERV-S CAACAATGTTTATGATATAACATCATTATTATATTCATTCTAGGAATTTTCTTGTGATAAAAATAATCAGTGTCTGTATCAGTAAAGTATACTACAT  
...G...TC...GTG.A...A...G...A.T.A...T.T...G.T...CA...C...



13310 13320 13330 13340 13350 13360 13370 13380 13390 13400  
XTERV-S CTACAATAGAATCATTACCTATACGAAAACCTGGAATAATATATAAATATTTCTCAATCAGTAT-TTTTGTAAATCAAAGGGTGAATGTAGTGCAGTA  
XLERV-S .GT.....GT....T..TT.....T.....ACACA.....A.....G.....A.A...GG

13410 13420 13430 13440 13450 13460 13470 13480 13490 13500  
XTERV-S GGTTTCTTTTACTATGATTTGTATGATTTACAATTTATACATGC---TTTAAATATGT-GTATGTATATATATATGTATATGGTTTAGTTAGTAAGTTTA  
XLERV-S .T.G.A.....-----A...TCTGT.....A.T.A.A.A...TA..TC...A...C....C.G.A.

13510 13520 13530 13540 13550 13560 13570 13580 13590 13600  
XTERV-S ATCAAGCAATTTAGAGATAAGGGGAGTCCAGTGTCTTGTACATATATTGTTGGGTAACAATACTGCGTTTATATGTAAACAATAACAATGACTATA  
XLERV-S .AG.AACC.A.GAG.....T...TG.GCC.TC.....A...GG.A---.G...CCC.C...-----

13610 13620 13630 13640 13650 13660 13670 13680 13690 13700  
XTERV-S GACTGTTTACCAGCAATAACAAGCGGACGGCAGGCAGACAATGCCCAATGTATTAAATAAGAAGTTGAGGTATAAAGTTTGGTATCTGATCAGAC  
XLERV-S -----TAAT.....G.A...AAT.C.TC.TC-----T...G.T...C.G.CT.A-.G.CA.AAAG.TC--.TA.A

13710 13720 13730 13740 13750 13760 13770 13780 13790 13800  
XTERV-S ACAATGGCTGACCATTG-----TTAAACAATATTGTTCAAGTCAATAGTTGGGCTTGGGGTTTTTCCCTAAGAAGTTTGGCATAAAGAACGGC  
XLERV-S .....GT....CTGTTTTT...T...CCT.T...GC.....G.....AA.--...CA...G.C.....C.A..

13810 13820 13830 13840 13850 13860 13870 13880 13890 13900  
XTERV-S CTCTGCCCTGGGTCAGGAGCTTCGCCTAGGACTCCTGAACGAGTGCCAGGATATTGGATCATCGCATGGTTATCGGGAACCTGAAGGTTTGCACC-AAA  
XLERV-S .T.....A..A.....A..T.....A.....G...AC.....A.T.A.....G.T.CA..T...C...

13910 13920 13930 13940 13950 13960 13970 13980 13990 14000  
XTERV-S GGTTGAGGGGCTCCCGAGTTTGCCTG---GATTAATGCTGAAGTGGCTATCTTTGTAACCAAAAACCGTACGAAGCTAAGTAAATGTTT-TAAATTCTA  
XLERV-S .C..C.A.....T.G...ATT...G.A.....TCC....TT..C.--T.A.....C...A...

14010 14020 14030 14040 14050 14060 14070 14080 14090 14100  
XTERV-S TTACTATGTGTGTGTAAGTTATTGC-TCATTTAATAGTTTTTCATCAGAAGGTTTAAATCATTGATCCTGTAAATATAAATAATTTGATAAAGGTTAA  
XLERV-S CCTTC.CT.....GT..A.GG.TA.TGC.C.CA..CAG..T...A.....T.....

14110  
XTERV-S CCCCTTATTACA  
XLERV-S
