# Supplementary material
Source: PubMed Central journal article supplement (PMC8278674)
Supplement: 12977_2021_564_MOESM5_ESM.pdf [file 12977_2021_564_MOESM5_ESM.pdf]

GATGAGATGTTTGACACATTAAACATTATCAATGATGCATTGAAGTGGCATAACCAAAGTAATAGCTCAGTATG  
GGCTTGTGCTAGACTATCTGACTGCCTCACAAGGAGGAATGTGTACAATCGTGGGTACGACTTGTGTAATTA  
CGTGTACAAAATTATAGTGAGTTTATTGAACGGCACATTGAACATATGAAACAAAATAAAAAGATAAATTTAGA  
GAAGAATATTTCAAAAAGTGACTGGAATGTAAATGTGCCAATTTGGCTGTCTGGTTGAATCATTTCATATTGGT  
TCTCAGGGGTTGGGGGTTGGATTGGAGGTATATTATATGTTTTATGGTATATAGTAATGTTTTAGTAATTAT  
ATATATATGTATTCGTCTGTTTTGCTGTTCTATATCGAAGTGTACTGCTTCAACAGTGGAAAGTCTGCCTTTG  
CGTACAGTTGGTGTTCCTTATGATGTTGGTGAGCCAGGGAGTGGAGTGTGGGTTAGCACAAATTATTTAAT  
ATCAATTATGTCTCACCAACAATAATGCTTTACCAGTATATACTGGTATATGTATAACAATATAAGATCATC  
CTAAAGGAATGCAGCATATCCCGTAAAGTTAAGAATGATTATGGGTGAGTACTGGTCAAACACCAGCCATTG  
TCTTAGTTCCCTTCCCTGAGTAGTTAAAAACACAGTGCCATACCTAATGAAGGAGTCTTGACCAGAGCTTGCTGG  
ATGCAACAGGTTTCTTTGATCATCTGCCAAGTTATTGATTCCCGCAGAATCTTTGGGTGAATTCAGTTTTCT  
TCCGCAGCTAAGTATCTTTGTTACCGCTAAATAATTGTTATTACAGTATTGCATTGTTTTGTCTATCTATCC  
TATTATTAATAGTATAATCGTTCAAGTCTTTGTGTTATCTCTCTTTGTACACTTCAAATGAACCATCAATA  
TTTGCATAAACTGTCACAAATTATATCCGTGACATAACACAGGT

>MH186040.1\_\_(reversed)\_Provirus\_1 Pyxicephalus adspersus clone BAC 10K01  
genomic sequence

ATGTGTTGGGTTAGCACAAATTTATTTAATATCAATCATGTCTCACCAACAATAATGCTTTGTCTAGTATATACT  
GGTATATGTATAACCAGACATGAGGTCATCCTAAAGAAATGTAGCATATCCTGTAAGGGTTAAGAATGATTATG  
GGTCAGTACTGGTCAAACACCAGCCATTGTCTTAGTTCCCTCCTGAGTAGTTAAAAACACAGTGCCATACCTA  
ATGAAGGAGTCTTGACCAGAGCTTGCTGGATGCAACATGTTTCTTTGATCATCTGCCAAGTTATTGATTTCCA  
GCAGAATCTTTGGGTGAATTCAGTTTTCTTCCGCAGCTAAGTATCTTTTGTACCGTTTATTAATTATTATTA  
CAGTATTGCATTGTTTTGTCTATCTATCTTATTAATAAAATAGTATAATCATTCAAGTCTTTGTATTATCTCTC  
TTTGTACACTTCAAATGAATCCCATCAATATTTGCATAAACTGTCACAAATTATATCCGTGACATAACACTT  
GGTACCAGGAGACGTGGGGTTGATGTGTGCAAACTAGAGATAGTGATGATAAGATTGATAGCAGGAGAATTT  
TGATGGTGTGTTGTGCGGATTTATTTATTTTAGTTTTTGTATTGTAAGTCATAGTGCAATCAGAATAAAATGCAG  
AAGTTGTTTAGCTGGGGTAAAAGAAAGTTGCAGGATGATCAGAGTGCAGTCCACTCCCAAGTTGGGTGTCCA  
CATCTGGACAGTGGAAACCAATTGCTCGCGAGTGAATAAAATATGTTGCACCGATCCGATTGGCAGACCCCTG  
CCAGTCGGTGAGGGAATTAGATCTGTCTCGGTATGACAAAAAGGAGCAGAAGGCCGCTGCACAGGTGGGATGG  
CTGTGTTTTTCAGGCGCTCCAAGCTGAGACAGAGAAAAAGAGAGATATTGGAATCTGAACTGCAGGTTGTTACAG  
AGCAGTTATCTCTATTGAGAAATGTGTTTGCCTGATACTGATACGCAGAGAGAAGAAGTTGTGTACAGTTTTTC  
AAAGTATGTAGTTAATGCTGTGAAGAGAAAACAGTGTGTAAGAAACGGCCTCTTACAAGAGAAGGGGCTAAG  
TTGCATGTTAGAGCATTGATTTCAAGAGGAAAATGGGGGAGGTTGAACATTGGTCAGGGTCTTCTGAGTCAG  
ATGAAGAAATTGAGATTGAAAAGACAGAAGAATTTATGAGACCAATAGTGACAACTAGACAGAGACGTGAAGT  
AAGGGAGAGATTGGGTGGAAATGACCGGAATAATGGTGATACAGACATGAGACCACACAGGGACCGTCTGCA  
GAACAGAATATGACAGAGGAGACTCGTTCATATACTGTAGGGGAGCTGACTGAGCTAGGACAGAAATACAGAC  
AGATACCTGGAGAAGGAATTTTGACATGGTTATTGCGAATTTGGGATCAGGGTGGAGACGGTGTGATGCTGAC  
TAATACTGAAGCAATTGGACTGGGAAGTGTATCCTTTGACCCAGAGTCCGTCTTCAAATGCACAGGGCACGC  
AATACTGATCGCCCTTTAGTTTGTGCTTTGATTAGAGACTCTGTGGCCCAAGTATATGAGACTCCAACAG  
AACTGATGGATGTATCTTTTGGCATAACATTGGGCGAGGGCATTACAGAGAGTACGAGAAGCTGGGTGTATCAC  
AGGATTAGTTAGGGATCCCGTTCCTATAGATGGACGTTATGGGGTATCTACCACCTGGGTGGGGCCAAACATG  
TCCCGATTTACTCCTTTAATGAGACAGAAAATCCTTAAGACAGCACCACAAAATTTACGCCCTGCATTATTCA  
CAGTATTAAGTGCTTTGGATGGGAGGCAAGGGAATGTGCATGAAGCAGCAGCATTATTGGGTGAGCTAGAGGA  
GATTGAAAAGGACCAGGACATAAGCAAAGACCAATACAGAAAACAGAAAAGGGAGATTTCAATAAGAGGTTT  
AAAATGACAAGAAAACAGTTGTTTCTTGATTTGCTTAGCAGTGGTGTCCCAAAGCAGACATTGATGGGATTC  
CTACTACTGATCTGTTCAAGCGCTGGAACAACACTGAAGGATAGAGGGAAGTTACAGCCAGCCAGACCCAAAGAA  
GGTGTGAGCTAGTGTACAAAAATAACCCCTCCTTCTACACCTCCCCAGAAAAGAAAACAACCCGTATAGG  
GAGGCACCAACAGCTTTATATGAATATGTTACAACACATACACCCTCCAAGAGAGAAAAGGGTGGGGGGTAC  
CACAGTCTATATTTTATTGACTAAAGGATAACTCCCTGCTCCACTGATCAGAATACAGACACTACATGGGTG  
ACAGTGGAGGGTTTGGGAGGTCAGATTACATGGATTTCTAAGGTTCACTGCAGACTACAAAATAGGCAATGGTC  
CTGTCTTTAATGCCAACATATTTGCATCTGAATTGCCAAAACATAACAGAAATGGATATCTTACGGGGCCA  
GACTATCCATACAATGACAGGGATGTATGTGTTTGGCACTCAGTCTGTTTTTTCTCTGTGTTTGCAGTCAAA  
CCCATTGTGAGGGGTCATGCCAAATGGACATCAGTGTACATTTCTACCCCTGAAGCACCCAGCTTATTTGAAGC

AATATTGGGGTACATACAAAAATTACAGAGACTGTTTCAGGCCATGTTGGAAGCTGGAGTGTTCAGACCATCAG  
TCAGTCCTTTTTATTGCTCATGTTTTTCCAGTAAATAAACTTGATGGATACTACAAGATGACCACTGACTATCA  
AGAGTTTAAAAAAAATGGTCCATATATTGGCTGCGGCTGATTCCGGATATGGTGACACTTGTACAGACTATTGC  
TCAGACAGTGGGGGAGTGGCATATGGTTCCTTGATTTATAAAAAAATTTCTTTCCAAAGACCATTGATGGAGAG  
TCTCAGGACCAATTTGTGTTTACCTTGGATGGAAAACAACATGCCACAATTGGATTATTACAAGGTTACCCAC  
ACAGCCCAATGATTTGTCATGGATTGGTTGCTAAAGATCTAGAAAAGCTTCCACCTATTTCTTATCTGGAACA  
GCTCTAGATGAAGTACCAAACGACAACCAGTGGTAAAACAGACAGAGTTAAGTAAAAGTGGTGGTATTTCTGC  
TCGGGAATCAACCATTTTGAATCAACAGTTAGCGGGACTGGTAACTGCACCTGTTGAACTGGAAGCACCTGTA  
ATCATGATTGATGGGAACTTTGCCAAGAGGCTTCGGATTGGGAGCATTGGACAGCTGATGAATATATAATTG  
TGTGATACACTGATGGTTGAGCTATGGACAAATTTGGACTAATACTGCTTTTCAACCTCCACAGGGACAATG  
TTTTATCAGACTGAGAGGGAGGGTTTAGCTGATATGCTGAAATACATGCAGTGGATATGAAGATTGAAGATAC  
TGCAAGTTCATCTGGACTTAATGAAAGTTACAATGGCCTGCTCAAACAAAAAAGAGCTGACCCCCACAAATAC  
ATTGATAGATTGGGTTTGGGTTGTGTACAAGCCTCATTTTTGTAAATCAGTGGGTGGTGGGGGTAGTACAC  
CATTCC TTCACATGTTAGGTTAGGGACAACAAAGAATTTTCTGAACTAGTTTTTTATTGTTAAAAAGTGAACTC  
AGTTACAGGACAAGATAGATGTTTTTGGGGGGTCCATTGTGGGAGAAAACTGTGAGTTTGTATAAACTGGAC  
TACCGTATTCTATCAGGCGTACATAAAAAGATGATGTGACTATGACCCATTGCCTGACTGATATGACAGTGAC  
TTGACCCAAGACATTTTTCAATAATGTTATATGATTATTTGCATGGATATGGATAATATCGAGTATATTAGAT  
AGAGGAAGGGAAAGTAAGAAGAAAGATGAAGTATTTGCTAGTAAATGCTAATACTAATGTAAACTCAGAGAT  
GTTGATGTTACCCTGTTTATTTTCCCTCCACAGACTAGTTCCAATCTTGGTGGCTCTAATTGGTTTTCACTA  
TGACCTGGAGTGGATTCTGATTATCAACATCTTATACAGGACACGCTTGAAAAAAAATTATTGTATATGAATC  
ACCGTTATGCCCAGCTGATGAATAAGACGGACTACTAAATATGTTCTCATAGTCCATTGTCATCTAGAATAT  
GCCATGTATTATCATTCTAGTACTACCGGAAGAACTTTTAAAAAGGACATGGATTGTTTATGGGGACCTGACT  
TTGGGAACATTATATTATACAAAAACAGGAATCAAATATACTCCGATGGAAGAAAAGAGTGACTGAAATCTAA  
AATGGCCAAATTGCTAATCCTGGTTAAATCCTGTCAATTTGATTCTCAGGGGTTGGGGGTGGATTGGAGGTAT  
ATTACATGTTTTATGGTATATAGTAATTGTTTTAGTAATTATATATATATGATTTCGTCATTTTTGCTGTTCT  
ATATCAAAATGTACTGCTTCAACAGTGAAGTTCTGCCCTTGCCTACAGTTGGTGTTCATTATGATGTTGGT  
GAGCCAGGGAGTGGAGTGTGGGTTAGCACAAATTTATTTAATATCAATCATGTCTCACCAACAATAATGCTTT  
GTCAGTATATACTGGTATATGTATAACCAGACATGAGGTCATCCTAAAGAAATGTAGCATATCCTGTAAGGGTT  
AGAATGATTATGGGTGAGTACTGGTCAAACACCAGCCATTGTCTTAGTTCCCTTCCCTGAGTAGTTAAAAACAC  
AGTGCCATACCTAATGAAGGAGTCTTGACCAGAGCTTGCTGGATGCAACATGTTTTCTTTGATCATCTGCCAAG  
TTATTGATTTCCAGCAGAACTTTGGGTGAATTCAGTTTTCTTCCGCAGCTAAGTATCTTTTGTACCCTTTA  
TTAATTATTATTACAGTATTGCATTGTTTTGTCTATCTATCTTATTAATAAATAGTATAATCATTCAAGTCTT  
TGTATTATCTCTCTTTGTACACTTCAAATTTGAATCCCATCAATATTTGCATAAACTGTCACAAATTATATCCG  
TGACATAACAGTA
