# Supplementary material
Source: PubMed Central journal article supplement (PMC8278674)
Supplement: 12977_2021_564_MOESM6_ESM.pdf [file 12977_2021_564_MOESM6_ESM.pdf]

```

                ** **   ** ***** *
XtERV-S        FAQKGGETILEWVLRVWDLG
African bullfrog ERV  YR.IP..G..T.L..I..Q.
MuERV-L        .K..P..YVW..I.....K.
HERV-L         YK..S..QAW..I.....N.

Ruff ERV       .GRLP..H.VT.L..C..N.
Turtle dove ERV  .SRRE..N..T.L..C..N.
HERV-S         CQ.LP..PLPA.L.CL..E.

PERV-C         VM.GPN.PPSVFLE.LLEAF
GALV           VL.GPA.PPSVFI..LMEAY
BAEV           IT.GKD.SPAAFME.LLEGF
FeLV          VV.GKE..PAAFLE.LKEAY
AKV           IT.GPN.SPSAFLE.LKEAY
EIAV          IR.GAK.PYP.F.D.LLSQI
FIV           LR.GAK.DYSSFID.LFAQI
VISNA         VK..NT.SYEDFIA.LLEAI
HIV-1         IR.GPK.PFRDY.D.FYKTL
HTLV-1        IL.GLE.PYHAF...LNIAL
IAP           II.GPQ.SFSDF.A.MTEAA
MTV           LK.GNE.SYETFIS.LEEAV
JSRV          IR.GPD.PYSDFIS.LQE.A
SMRV          IR.GPD.SYSDF.S.LQETA
MgLDV         VT.GL..PF.SFAE.LLNAY
ALV           IT.GPS.SFVDFAN.LIKAV
Consensus     xxQxxxExxxxφxxRxxxxx

```

Figure 6
