# Supplementary material
Source: PubMed Central journal article supplement (PMC8278674)
Supplement: 12977_2021_564_MOESM7_ESM.pdf [file 12977_2021_564_MOESM7_ESM.pdf]

|                      | 10                     | 20         | 30                      | 40          | 50                     | 60           | 70            |
|----------------------|------------------------|------------|-------------------------|-------------|------------------------|--------------|---------------|
| XtERV-S              | VAKAVQMMRRMSRIIEHAL    | <b>NNT</b> | -----LDGLTSLTEEV        | QMRLLV      | <b>LQNRASLDYILASKG</b> | --GVC        | CALIG-DECC    |
| XlERV-S              | -.RS...K.....          |            | -----*R.....D.K.....    |             |                        |              |               |
| Alligator ERV        | IGRTI.KI.LLAN.LKQVN    | <b>D</b>   | -----AES.DH..Q.MIAL     | .TM.....    | <b>IA..FT.....</b>     |              | ---I....-K..Y |
| Coel-ERV             | T.RSI.EI.AL.T.V.QLA    | <b>K</b>   | -----SGS.LA.ST.ETAT     | .A.A.....   | <b>MA..F.....</b>      |              | ---V.-K..     |
| Turtle ERV           | ..Y..REI..LEVAF.KVA    | <b>A</b>   | -----TKA.RAINM.LGEV     | .QM.....    | <b>MA..V.....</b>      |              | ---V.-K..     |
| RSV                  | A.Q.LREIE.LACWSVKQA    | <b>L</b>   | -----TSL.GD.LDD.TSI     | .HA.....    | <b>AI..FL.LAH</b>      | --HG         | EDVA-GM..     |
| ALV-J                | A.Q.LKEIE.LACWSVKQA    | <b>L</b>   | -----SLI.NAIL.DTNSI     | .HA.....    | <b>AI..FL.LAQ</b>      | --HG         | QDVE-GM..     |
| African bullfrog ERV | ---S..NAHTIEKFA.LFD    | <b>V</b>   | -----DEMF.T.NIINDAL     | KWHTK.      | <b>IA.YGLV..</b>       | <b>LT..Q</b> | --M.TIV.-TT.. |
| Bos-Rum1             | -----TADIMVKV.ALN      | <b>F</b>   | -----KQALLDSKKAIEA      | .N..QS...KA | <b>M..MA..ILT.AQ</b>   | --T          | .I.K-V..      |
| Cat-SynCar1          | -----IEDIWHV.ALT       | <b>Y</b>   | -----TKALNDSMR..SL      | .NS..TL..KA | <b>..MA..ILT.AQ</b>    | --T          | .IVK-T..      |
| HERV-S               | .ITVEMQVTAL.EHRAQN     | <b>C</b>   | -----HVI.LLF.D..DHI     | .KA.....    | <b>M..IVTTAQ</b>       | --T          | .V.-TR..      |
| Chimp ERV-S          | FITVEMQITALAEHTVQV     | <b>Y</b>   | -----RVA.LL.ID..D.T     | .K....      | <b>WMA..IVT.DQ</b>     | --T          | .T.-SQ..      |
| Platyfish            | .MSSLDQIADL.KA..VIA    | <b>E</b>   | -----GKA.IILMSN.LASV    | .LA.....    | <b>A..FL..AQ</b>       | --T          | .I..S..       |
| Giant mudskipper     | .MS.LDQISDL.HA..TIA    | <b>E</b>   | -----GRA.QLMSS.LASV     | .LA.....    | <b>A..FL..AQ</b>       | --T          | .I..Q..       |
| ZFERV                | PN.N.DRINYIHYNVQRLS    | <b>L</b>   | -----R.AVSG.K.QLAATS    | .MAI...     | <b>LA..ML.SER</b>      | --T          | .SMFL-.T..    |
| Syn-Mar1             | PIYMLNRII.LQAVL.IIT    | <b>Q</b>   | -----ATAFDL.ATQQT..     | .AAIY...    | <b>LA..L..EE</b>       | --T          | .GKFNSSD..    |
| Syn-Cav1             | SIYMLNRII.LQDAL.ITA    | <b>ES</b>  | -----AYA.NP.ANQQTNIQNA  | .Y...       | <b>LA..L..KE</b>       | --T          | .GKFNLS..     |
| Syn-Ten1             | F.YHEATL.NLTQVVRNIAMS  |            | -----GKAIE.QQRSLDSL     | .AN..D..    | <b>IA..FL..EQ</b>      | --T          | .IAN-TS..     |
| AKV                  | ALV.T.QFQQLQAAMHDD     | .KEV       | -----EKSIN.EKSLTSLSE    | .....       | <b>RG..LLFLKE</b>      | --T          | .ALK-E..      |
| FeLV                 | ALLETAQF.QLQMAMHTDIQAL |            | -----EESISA.EKSLTSLSE   | .....       | <b>RG..LLFLQE</b>      | --T          | .ALK-E..      |
| GALV                 | PIDLQ.GLTSLQIA.DAD     | .RAL       | -----Q.SVSK.EDSLTSLSE   | .....       | <b>RG..LLFLKE</b>      | --T          | .ALK-E..      |
| PERV-C               | PQOLETGLSNLH..VTED     | .QAL       | -----EKSVSN.E.SLTSLSE   | .....       | <b>RG..LLFLKE</b>      | --T          | .VALK-E..     |
| HTLV-1               | GSMASLASGKSLHEVDKDISQL |            | -----TQAIIVKNHKNLLKIAQY | .A...       | <b>RG..LLFWEQ</b>      | --T          | .KALQ-EQ..    |
| BLV                  | S.LSH.RLTSLIHVL.QDQQL  |            | -----ITAINQTHYNLLN      | .VAS..A...  | <b>RG..WLYIRL.FQSL</b> | --T          | .PT.N-EP..    |
| mouse-SynA           | ITTSTVYFQQL.KALS       | .SDS.DEI   | -----ATSII..QDQIDSLAG   | .....       | <b>RA..L.V.ER</b>      | --T          | .LFLQ-E..     |
| mouse-SynB           | L.TSTLYFQQL.KVLSET     | .EEI       | -----AASIT.QNQIDSLAG    | .....       | <b>RA..L.T.E</b>       | --T          | .LFLQ-E..     |
| Syncytin-1           | ITTST.FYYKL.QELNGDMERV |            | -----A.S.VT.QDQLNSLAA   | .....       | <b>RA..LLT.ER</b>      | --T          | .LFL.-E..     |
| Syncytin-2           | IT..SLTYSQL.KE.ANNIDTM |            | -----AKA..TMQ.QIDSLAA   | .....       | <b>RG..MLT.AQ</b>      | --T          | .LALD-EK..    |
| Syn-ory              | LGI..HKY.EL.QQLINDVQTL |            | -----STTIQD.QDQIDSLAE   | .....       | <b>RG..LLT.ER</b>      | --T          | .LALQ-EK..    |
| Dasy-Env1-1          | LGLSLTQYTQI.NQLVSDVRAL |            | -----SNTIKEIQDQIDSLAD   | .....       | <b>RG..LLT.ER</b>      | --T          | .LALQ-EQ..    |
